# Supplementary material
Source: publisher figshare collection journal article supplement (https://future-science-group.figshare.com/articles/dataset/_/22116839)

HEJ-ICCBS  
10/8/2021 12:52:40 PM

File: GIA-II-189a  
Sample: IRFAN ALI /PROF. DR. KHALID  
Instrument: JEOL 600H-1  
Inlet: Direct Probe

Date Run: 10-08-2021 (Time Run: 12:46:23)

Ionization mode: EI+

Run By: MASS LAB 104

Scan: 5

Base: m/z 145; 42%FS TIC: 1147328

#Ions: 134

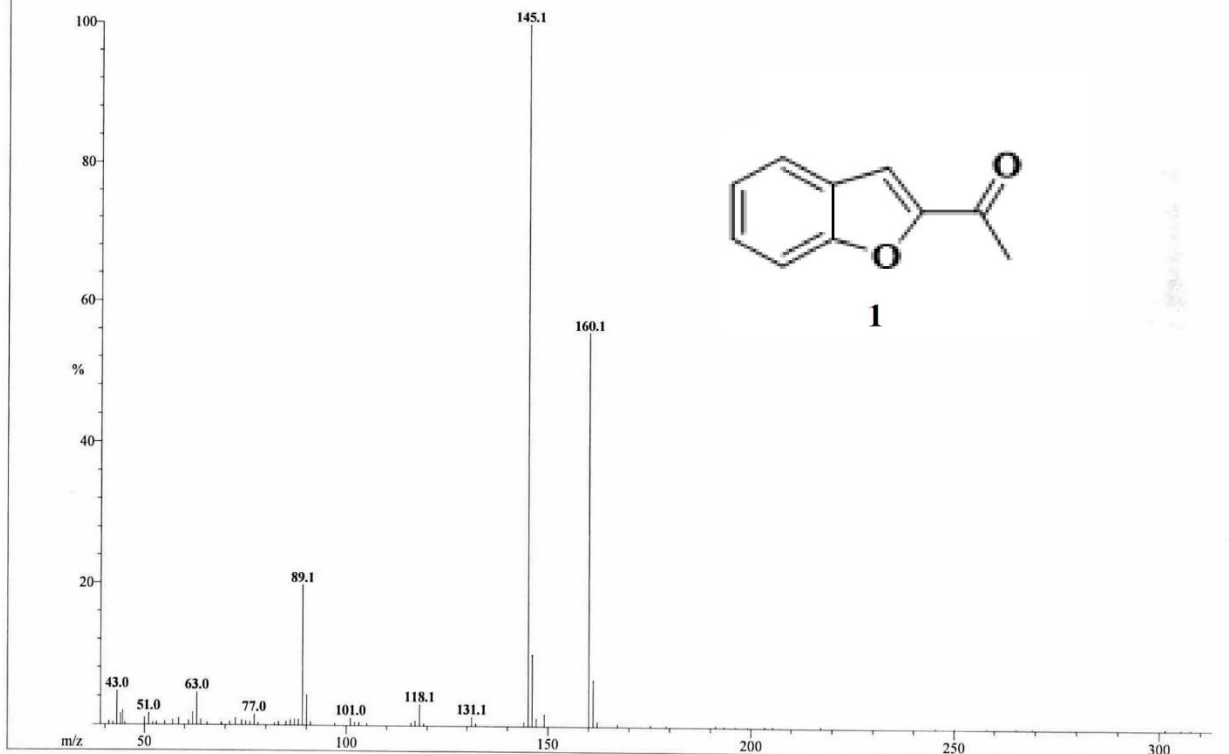

HEJ-ICCBS  
10/8/2021 12:52:40 PM

File: GIA-II-189a  
Sample: IRFAN ALI /PROF. DR. KHALID  
Instrument: JEOL 600H-1  
Inlet: Direct Probe

Date Run: 10-08-2021 (Time Run: 12:46:23)

Ionization mode: EI+

Run By: MASS LAB 104

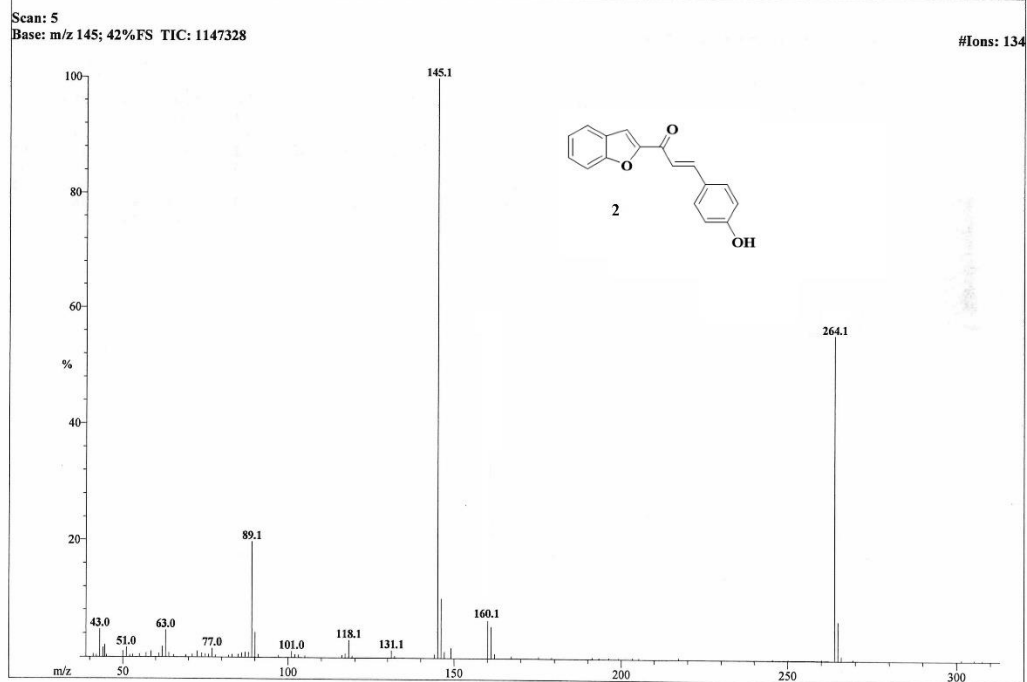

HEJ-ICCBS  
10/6/2021 12:16:43 PM

File: GIA-II-129a  
Sample: IRFAN ALI /PROF. DR. KHALID  
Instrument: JEOL 600H-1  
Inlet: Direct Probe

Date Run: 10-06-2021 (Time Run: 12:11:03)

Ionization mode: EI+

Run By: MASS LAB 104

Scan: 14

Base: m/z 293; 89.9%FS TIC: 4110160

#Ions: 193

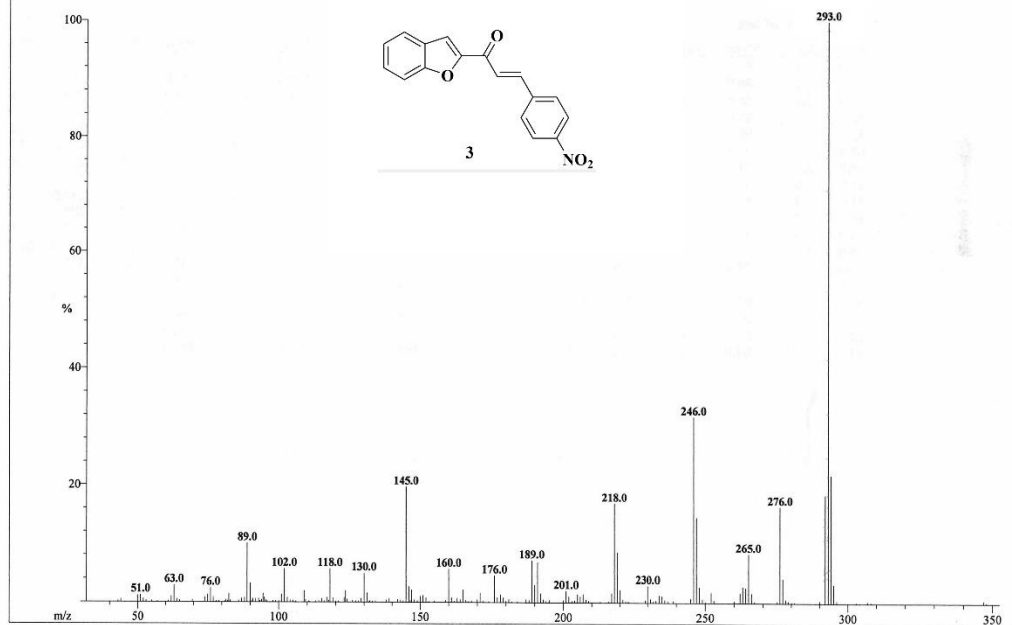

HEJ-ICCBS  
11/7/2020 12:59:06 PM

File: GIA-II-145a  
Sample: IRFAN ALI /DR. KHALID  
Instrument: JEOL 600H-1  
Inlet: Direct Probe

Date Run: 11-07-2020 (Time Run: 12:43:46)

Ionization mode: EI+

Run By: MASS LAB-104

Scan: 9

Base: m/z 247; 9.1%FS TIC: 968878

#Ions: 455

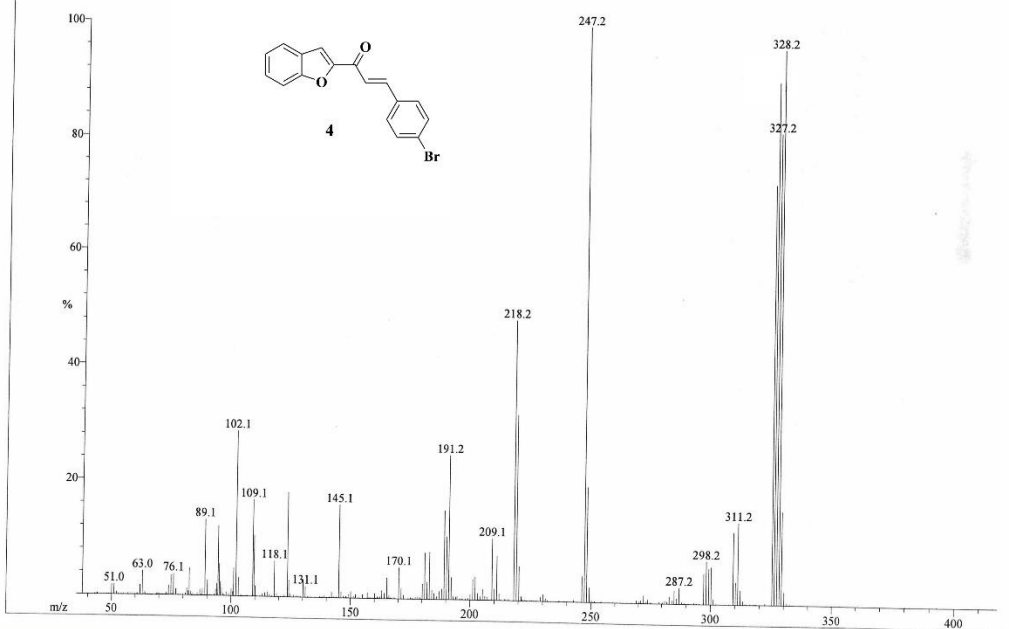

HEJ-ICCBS  
10/29/2020 4:51:19 PM

File: GIA-II-6D  
Sample: IRFAN ALI /DR. KHALID  
Instrument: JEOL 600H-1  
Inlet: Direct Probe

Date Run: 10-29-2020 (Time Run: 16:28:06)

Ionization mode: EI+

Run By: MASS LAB-104

Scan: 5

Base: m/z 287; 2.5%FS TIC: 344542

#Ions: 407

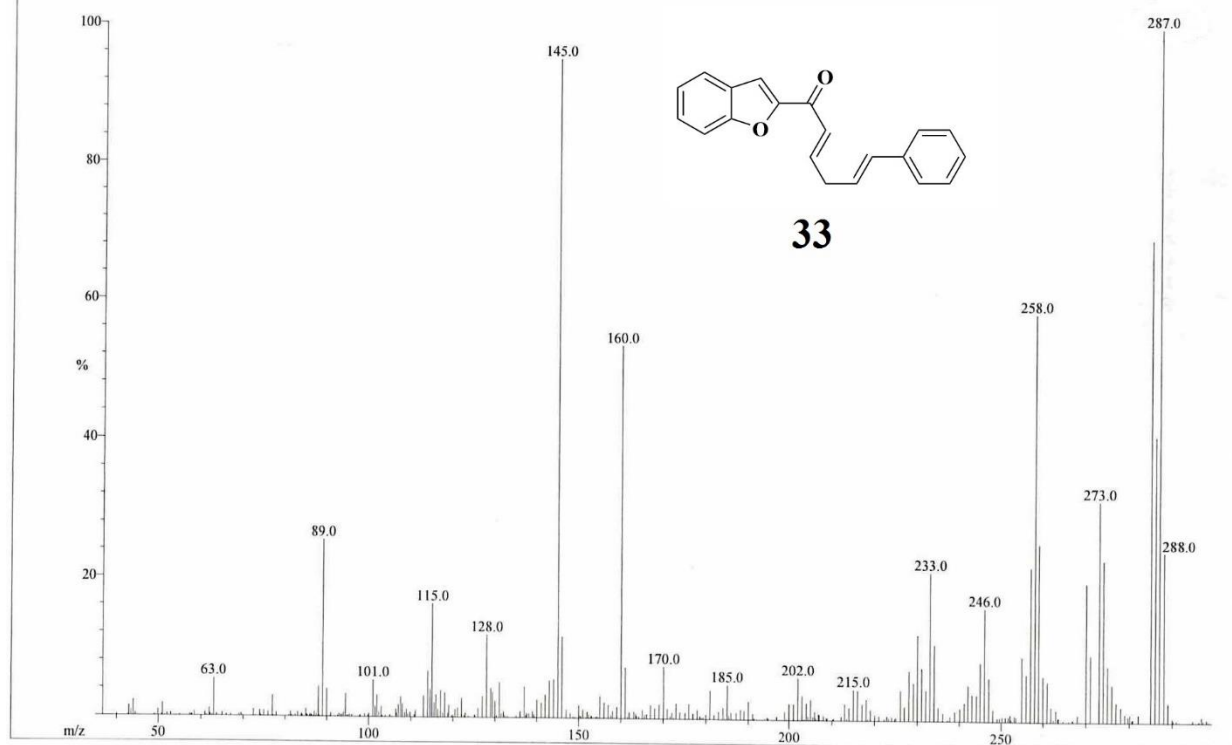

HEJ-ICCBS  
11/12/2020 10:46:11 AM

File: GIA-II-183a  
Sample: IRFAN / DR. KHALID  
Instrument: JEOL 600H-1  
Inlet: Direct Probe

Date Run: 11-12-2020 (Time Run: 10:26:02)

Ionization mode: EI+

Run By: MASS LAB-104

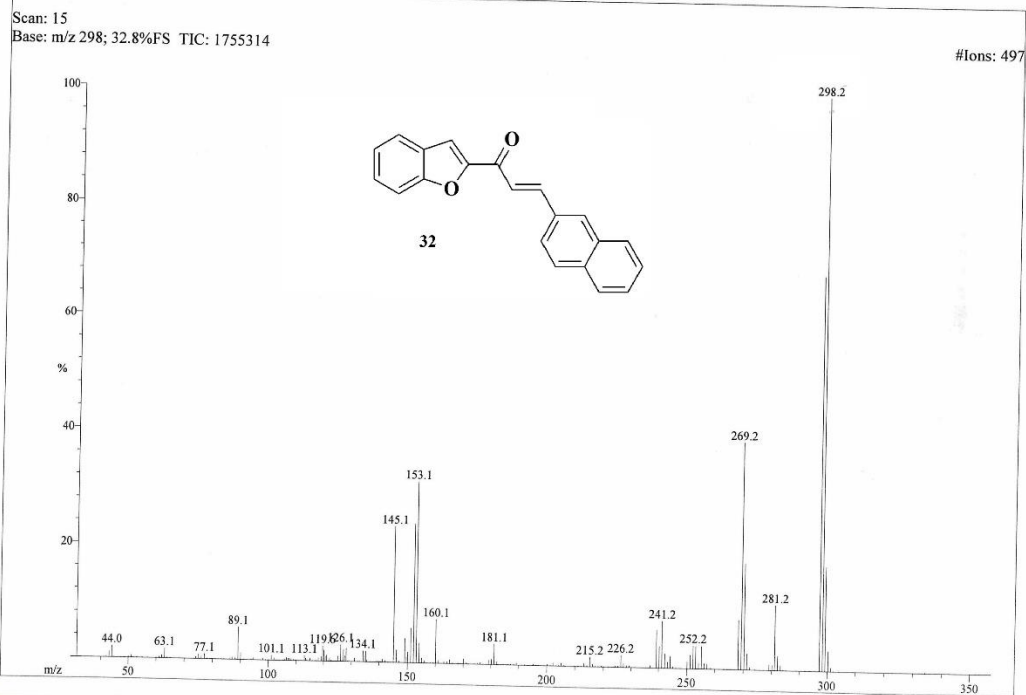

HEJ-ICCBS  
11/12/2020 10:46:11 AM

File: GIA-II-173a  
Sample: IRFAN / DR. KHALID  
Instrument: JEOL 600H-1  
Inlet: Direct Probe

Date Run: 11-12-2020 (Time Run: 10:26:02)

Ionization mode: EI+

Run By: MASS LAB-104

Scan: 15

Base: m/z 298; 32.8%FS TIC: 1755314

#Ions: 497

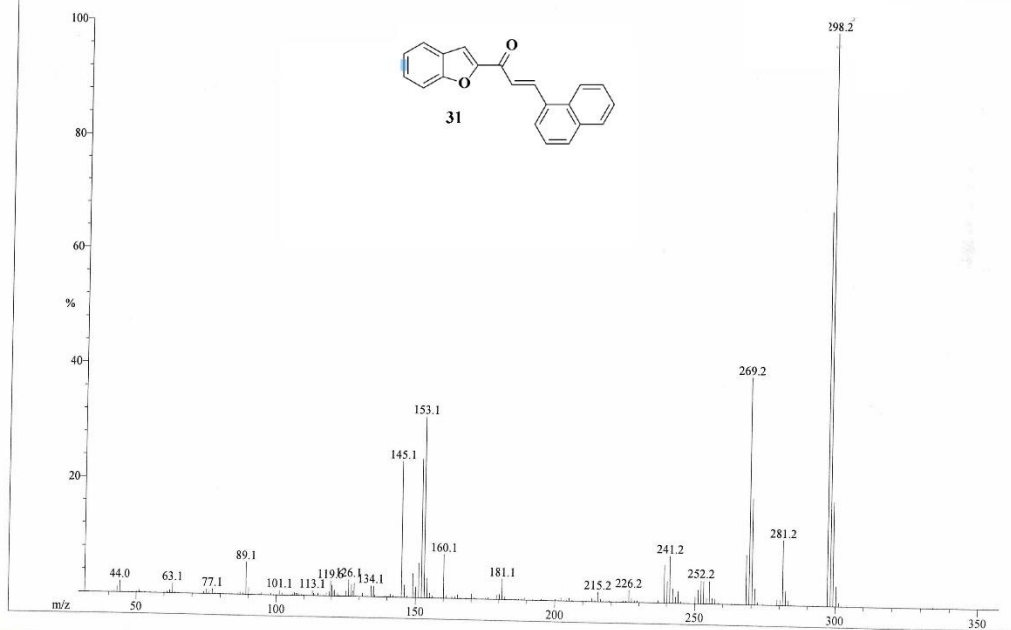

HEJ-ICCBS

11/7/2020 12:19:47 PM

File: GIA-II-127a

Sample: IRFAN ALI /DR. KHALID

Instrument: JEOL 600H-1

Inlet: Direct Probe

Date Run: 11-07-2020 (Time Run: 12:12:09)

Ionization mode: EI+

Run By: MASS LAB-104

Scan: 11

Base: m/z 227; 2.9%FS TIC: 221974

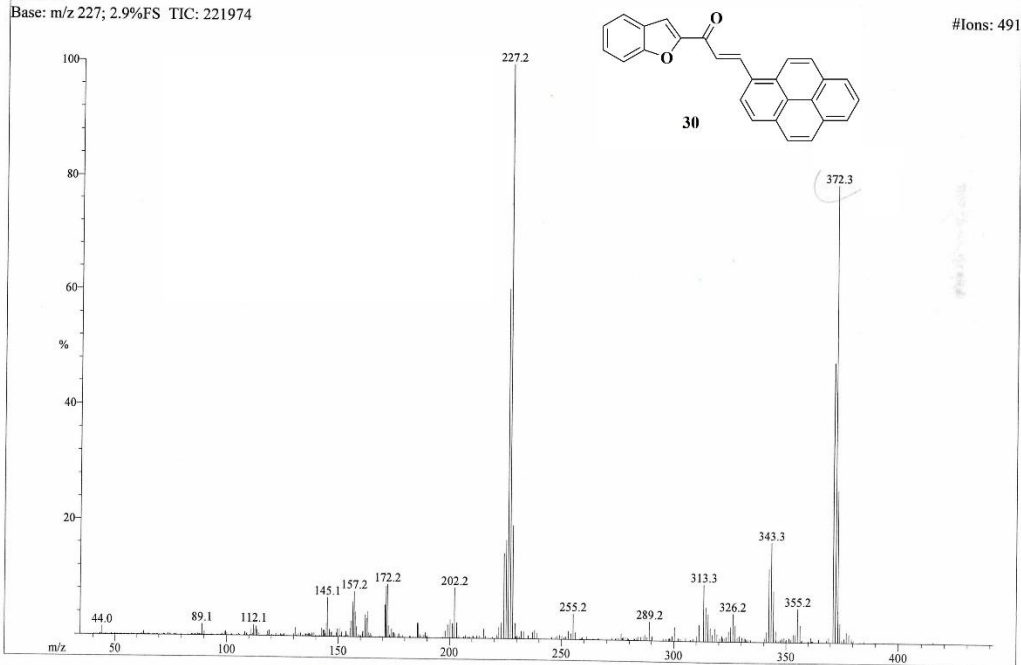



HEJ-ICCBS  
11/3/2020 3:08:31 PM

File: GIA-II-6J  
Sample: IRFAN ALI/DR. KHALID KHAN  
Instrument: JEOL 600H-1  
Inlet: Direct Probe

Date Run: 11-03-2020 (Time Run: 15:00:16)

Ionization mode: EI+

Run By: MASS LAB-104

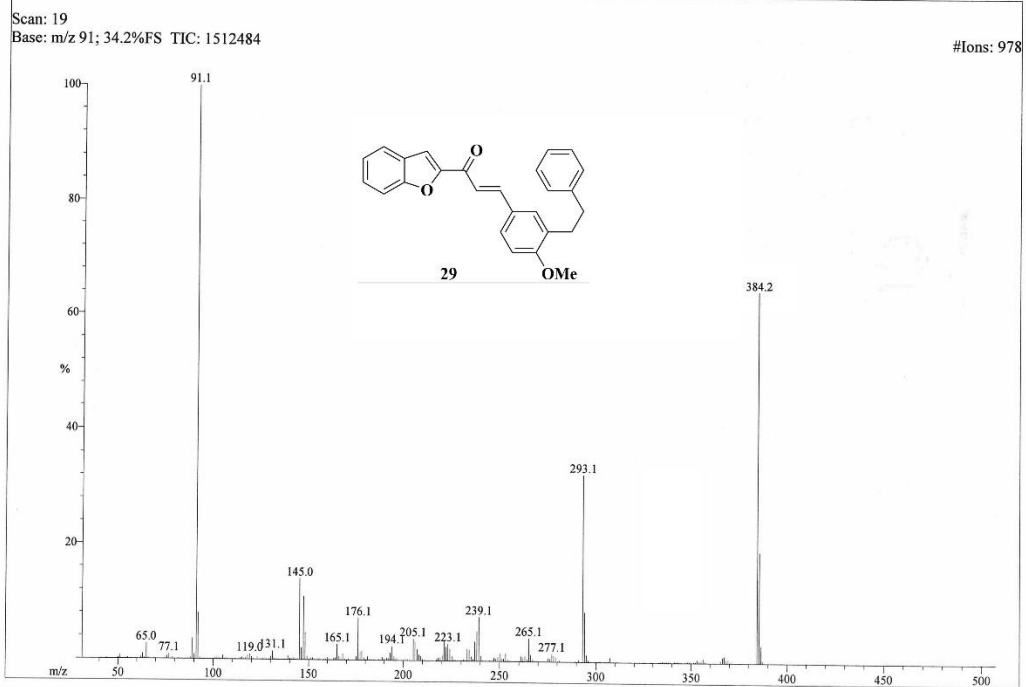

HEJ-ICCBS

11/3/2020 2:41:22 PM

File: GIA-II-6i (1230)

Sample: IRFAN ALI /DR. KHALID

Instrument: JEOL 600H-1

Inlet: Direct Probe

Date Run: 11-03-2020 (Time Run: 14:32:00)

Ionization mode: EI+

Run By: MASS LAB-104

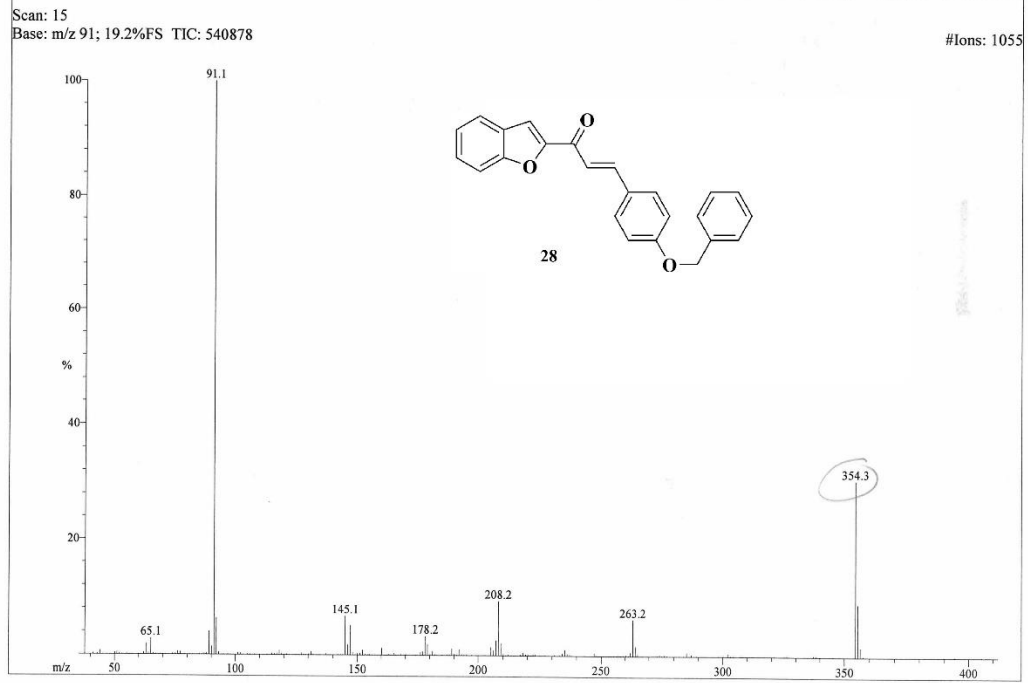

HEJ-ICCBS  
11/3/2020 2:41:22 PM

File: GIA-II-121a  
Sample: IRFAN ALI /DR. KHALID  
Instrument: JEOL 600H-1  
Inlet: Direct Probe

Date Run: 11-03-2020 (Time Run: 14:32:00)

Ionization mode: EI+

Run By: MASS LAB-104

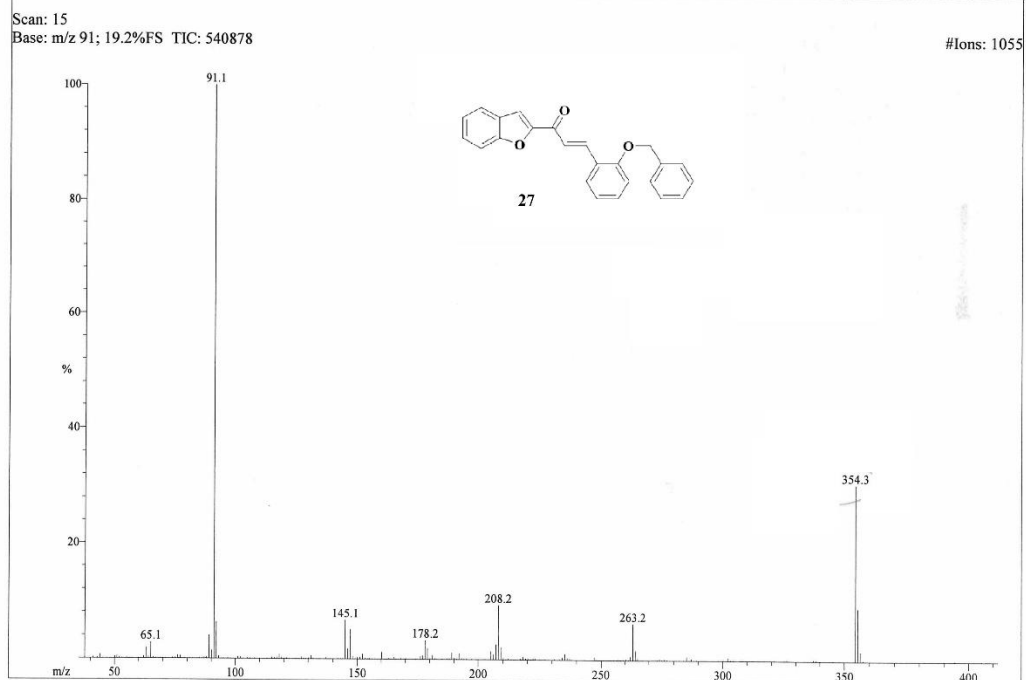

HEJ-ICCBS

12/15/2020 12:39:11 PM

File: GIA-II-159a

Sample: IRFAN ALI /DR. KHALID

Instrument: JEOL 600H-1

Inlet: Direct Probe

Date Run: 12-15-2020 (Time Run: 12:24:59)

Ionization mode: EI+

Run By: MASS LAB-104

Scan: 16

Base: m/z 238; 7.9%FS TIC: 634532

#Ions: 1194

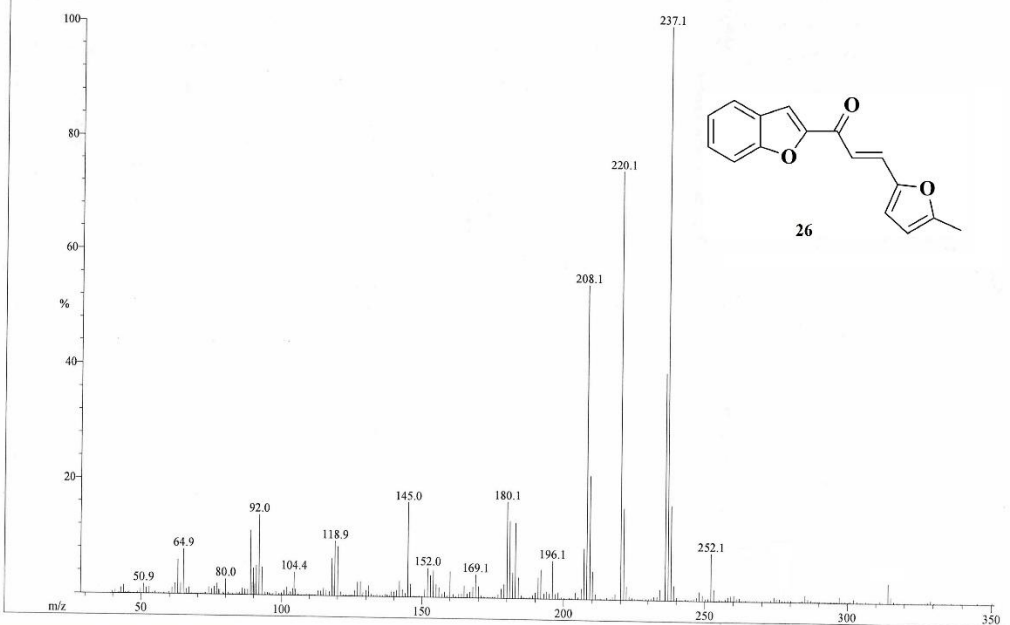

HEI-ICBS  
11/3/2020 3:00:58 PM

File: GIA-II-9F  
Sample: IRFAN ALI /DR. KHALID  
Instrument: JEOL 600H-1  
Inlet: Direct Probe

Date Run: 11-03-2020 (Time Run: 14:45:26)

Ionization mode: EI+

Run By: MASS LAB-104

Scan: 8

Base: m/z 268; 10.7%FS TIC: 718824

#Ions: 1188

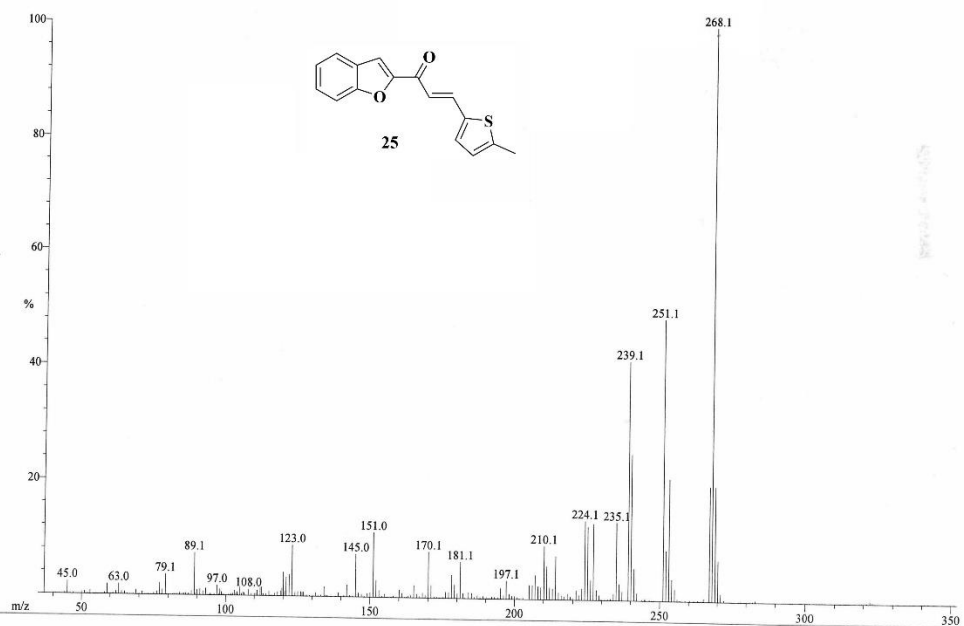

HEJ-ICCBS  
11/2/2020 3:12:40 PM

File: GIA-II-6e  
Sample: IRFAN ALI /DR. KHALID  
Instrument: JEOL 600H-1  
Inlet: Direct Probe

Date Run: 11-02-2020 (Time Run: 15:04:10)

Ionization mode: EI+

Run By: MASS LAB-104

Scan: 8

Base: m/z 268; 9.6%FS TIC: 771472

#Ions: 792

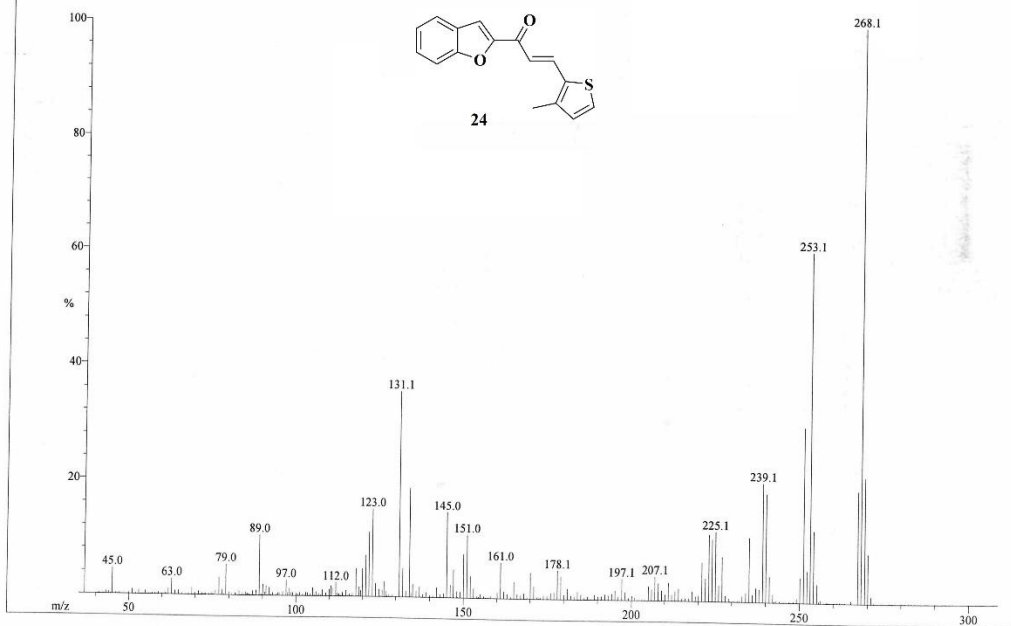

HEI-ICCBS  
12/15/2020 12:37:28 PM

File: GIA-II-135a  
Sample: IRFAN ALI /DR. KHALID  
Instrument: JEOL 600H-1  
Inlet: Direct Probe

Date Run: 12-15-2020 (Time Run: 12:24:59)

Ionization mode: EI+

Run By: MASS LAB-104

Scan: 4

Base: m/z 237; 6.1%FS TIC: 461406

#Ions: 1287

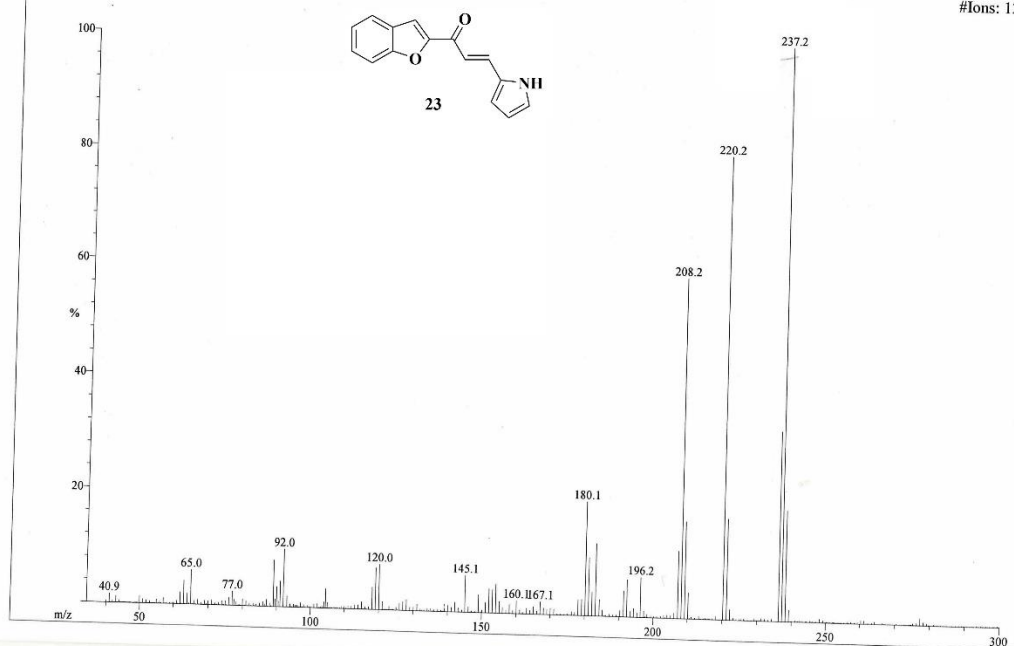

HEJ-ICCBS  
11/24/2020 11:12:58 AM

177  
1472  
File: GIA-II-185a  
Sample: IRFAN ALI/DR. KHALID  
Instrument: JEOL 600H-1  
Inlet: Direct Probe

Date Run: 11-24-2020 (Time Run: 11:01:52)

Ionization mode: EI+

Run By: MASS LAB-104

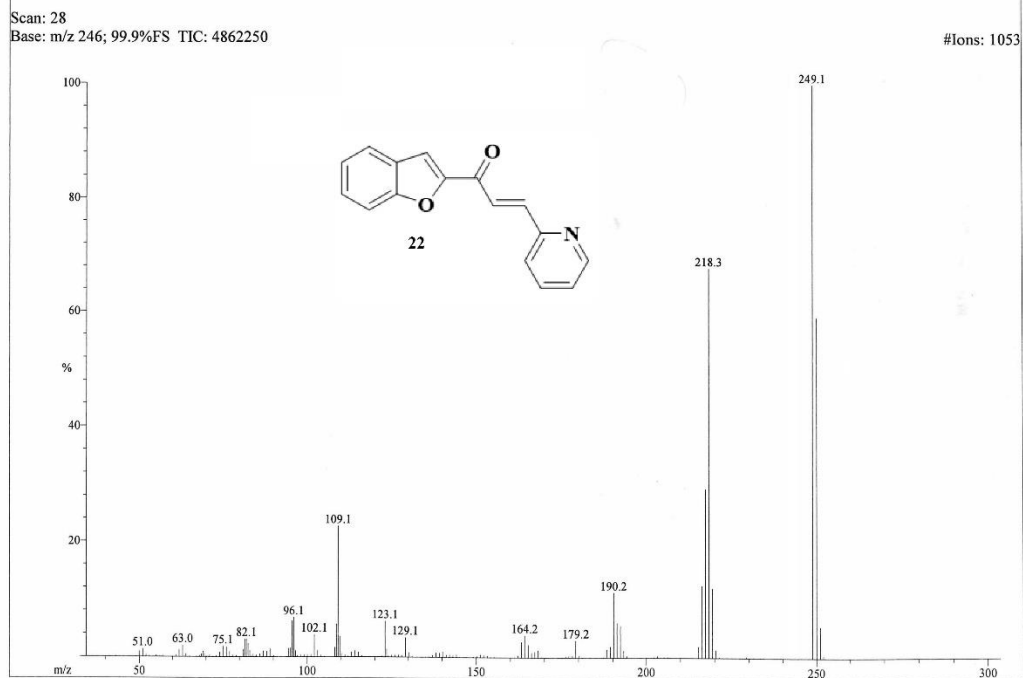



HEJ-ICCBS  
10/8/2021 12:43:11 PM

File: GIA-II-151a  
Sample: IRFAN ALI /PROF. DR. KHALID  
Instrument: JEOL 600H-1  
Inlet: Direct Probe

Date Run: 10-08-2021 (Time Run: 12:36:02)

Ionization mode: EI+

Run By: MASS LAB 104

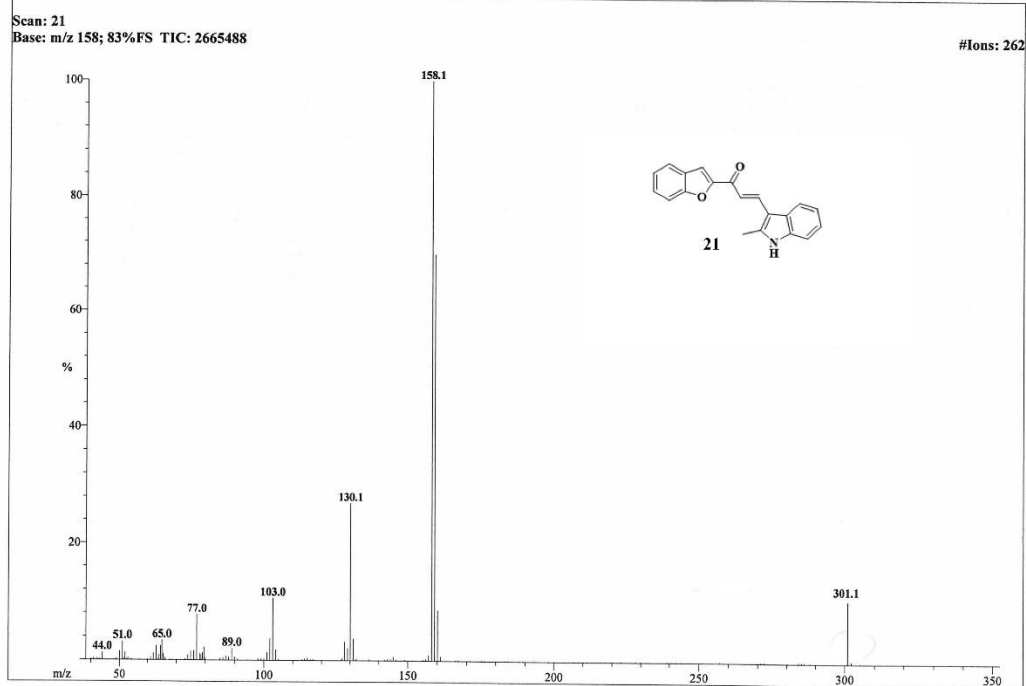

HEJ-ICCBS  
10/29/2020 4:51:19 PM

File: GIA-II-6D (113a)  
Sample: IRFAN ALI /DR. KHALID  
Instrument: JEOL 600H-1  
Inlet: Direct Probe

Date Run: 10-29-2020 (Time Run: 16:28:06)

Ionization mode: EI+

Run By: MASS LAB-104

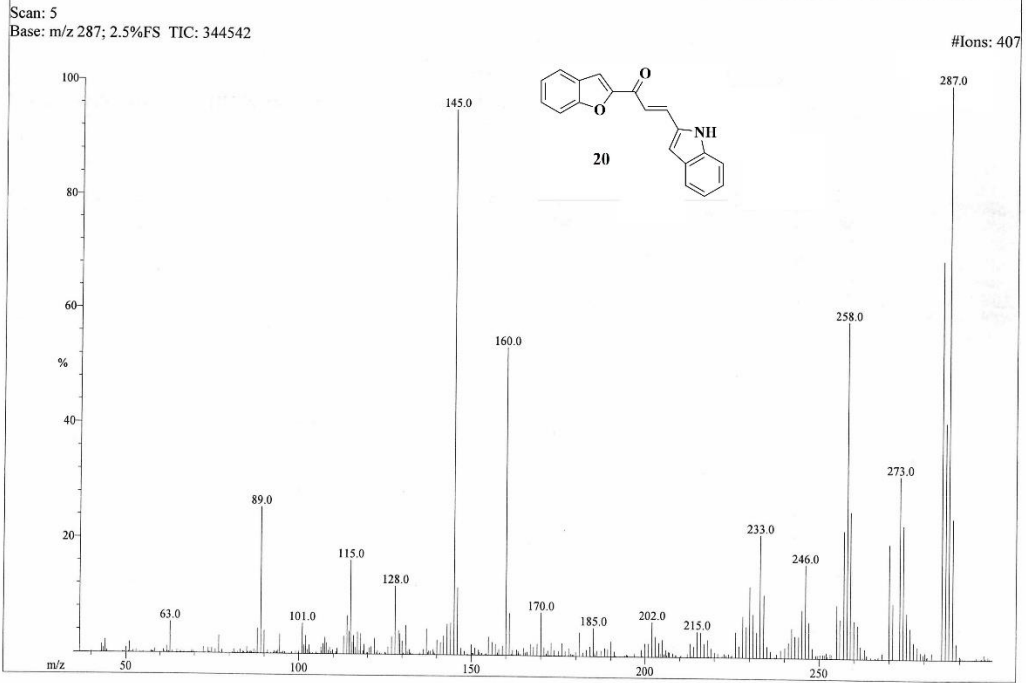

HEJ-ICCBS  
10/6/2021 12:39:04 PM

File: GIA-II-149a  
Sample: IRFAN ALI/PROF. DR. KHALID  
Instrument: JEOL 600H-1  
Inlet: Direct Probe

Date Run: 10-06-2021 (Time Run: 12:32:56)

Ionization mode: EI+

Run By: MASS LAB 104

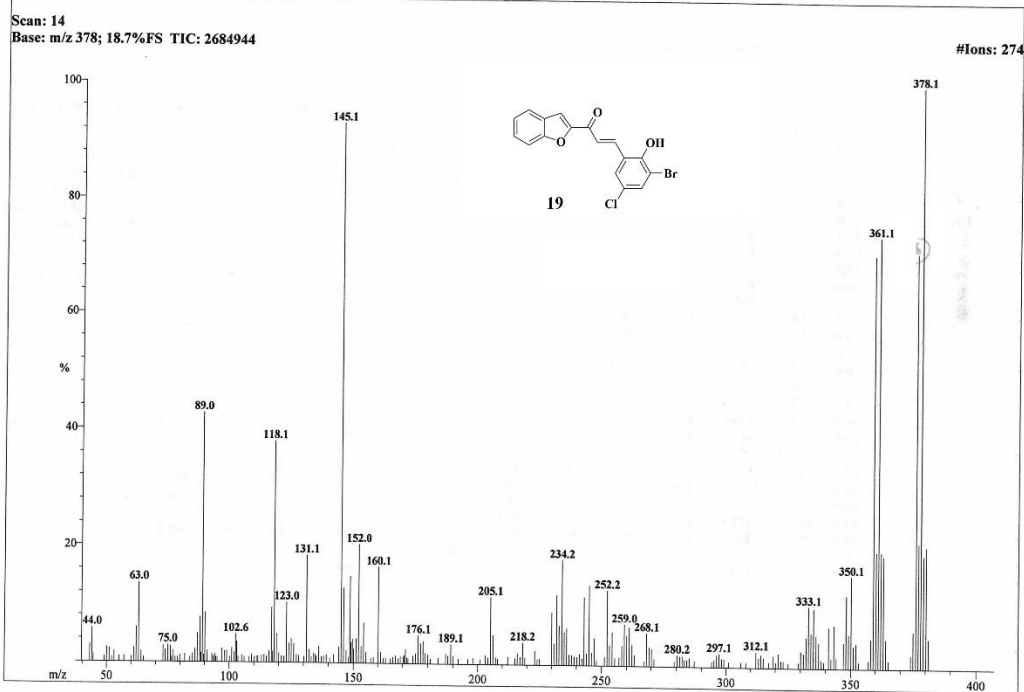

HEJ-ICCBS  
11/25/2020 11:43:48 AM

File: GIA-II-W  
Sample: IRFAN ALI /DR. KHALID  
Instrument: JEOL 600H-1  
Inlet: Direct Probe

Date Run: 11-25-2020 (Time Run: 10:34:16)

Ionization mode: EI+

Run By: MASS LAB-104

Scan: 8  
Base: m/z 388; 81.8%FS TIC: 9421484

#Ions: 806

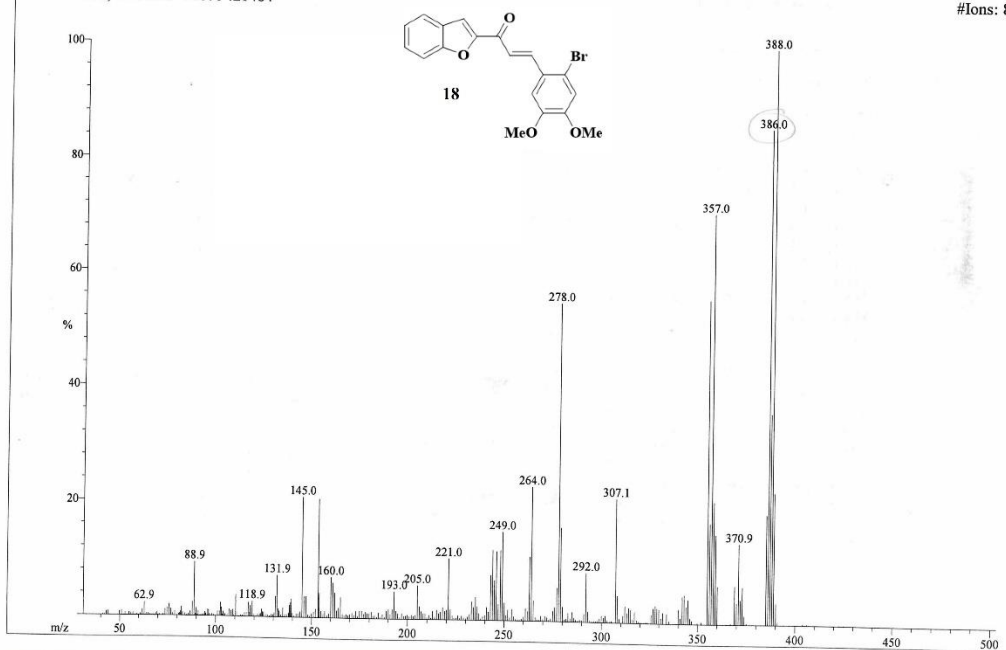

HEJ-ICCBS  
11/21/2020 10:45:41 AM

File: GIA-II-191a  
Sample: IRFAN ALI /DR. KHALID  
Instrument: JEOL 600H-1  
Inlet: Direct Probe

Date Run: 11-21-2020 (Time Run: 10:33:16)

Ionization mode: EI+

Run By: MASS LAB-104

Scan: 14

Base: m/z 386; 2.3%FS TIC: 358000

#Ions: 320

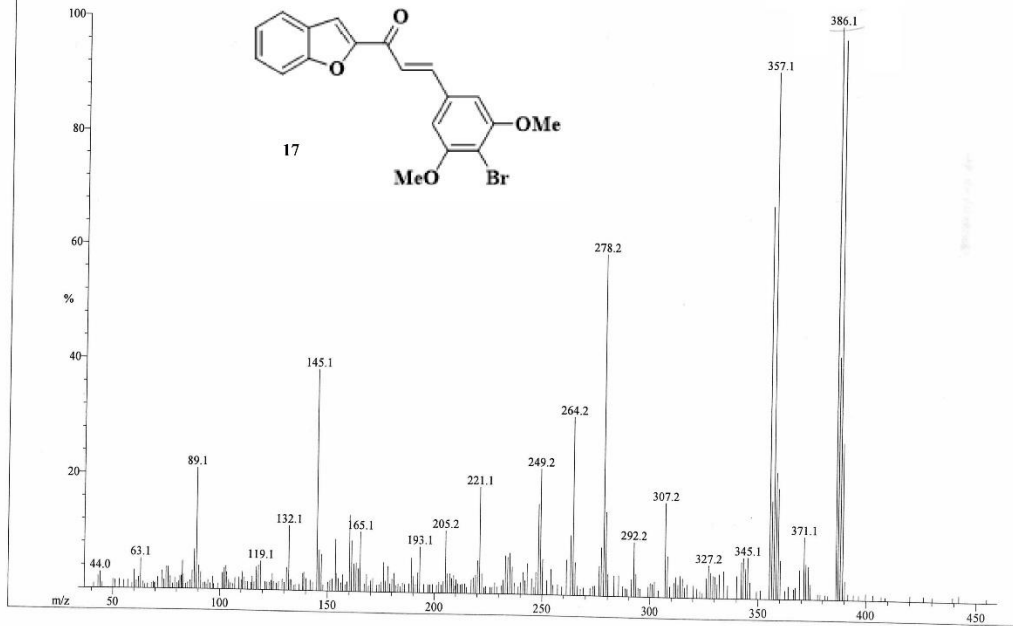

HEJ-ICCBS  
11/21/2020 11:17:03 AM

File: GIA-II-~~24~~  
Sample: IRFAN ALI /DR. KHALID  
Instrument: JEOL 600H-1  
Inlet: Direct Probe

Date Run: 11-21-2020 (Time Run: 11:07:28)

Ionization mode: EI+

Run By: MASS LAB-104

Scan: 10

Base: m/z 247; 8.4%FS TIC: 823742

#Ions: 383

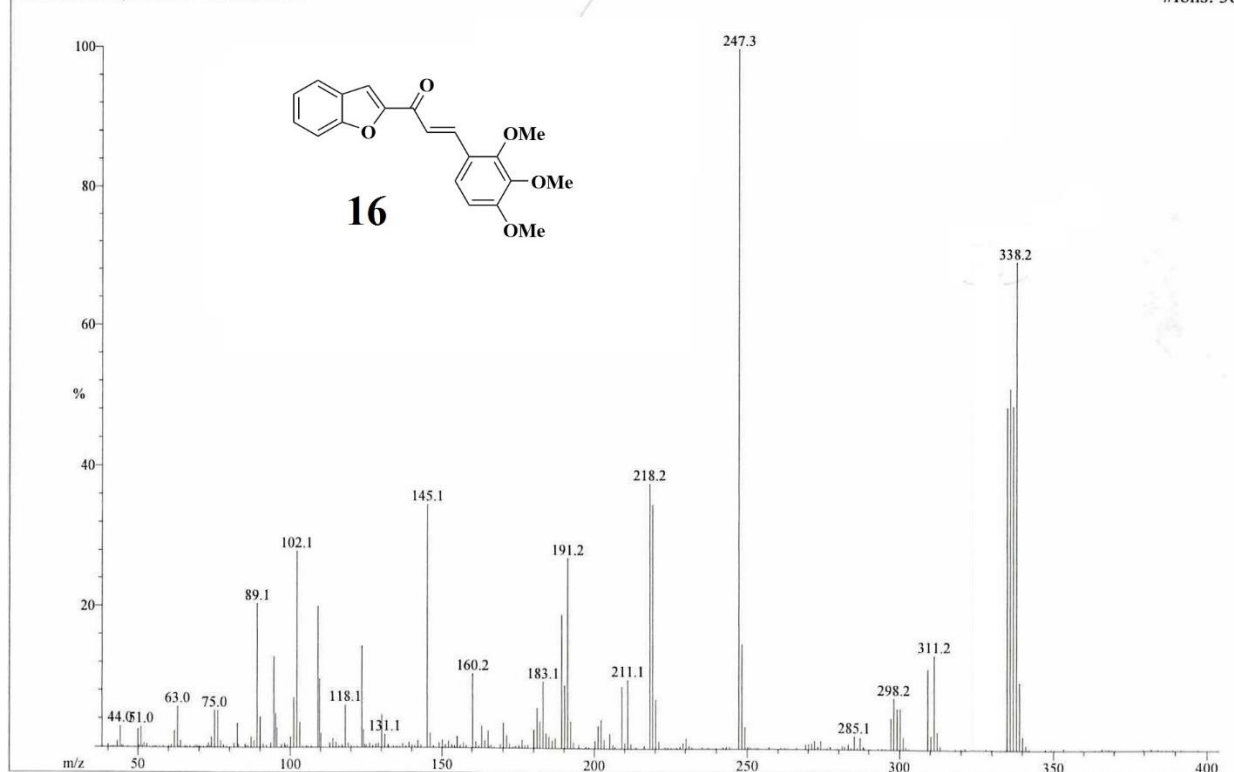

HEJ-ICCBS  
12/15/2020 2:03:35 PM

File: GIA-II-137A  
Sample: IRFAN ALI/DR. KHALID  
Instrument: JEOL 600H-1  
Inlet: Direct Probe

Date Run: 12-15-2020 (Time Run: 12:47:48)

Ionization mode: EI+

Run By: MASS LAB-104

Scan: 9

Base: m/z 278; 87.8%FS TIC: 5205966

#Ions: 895

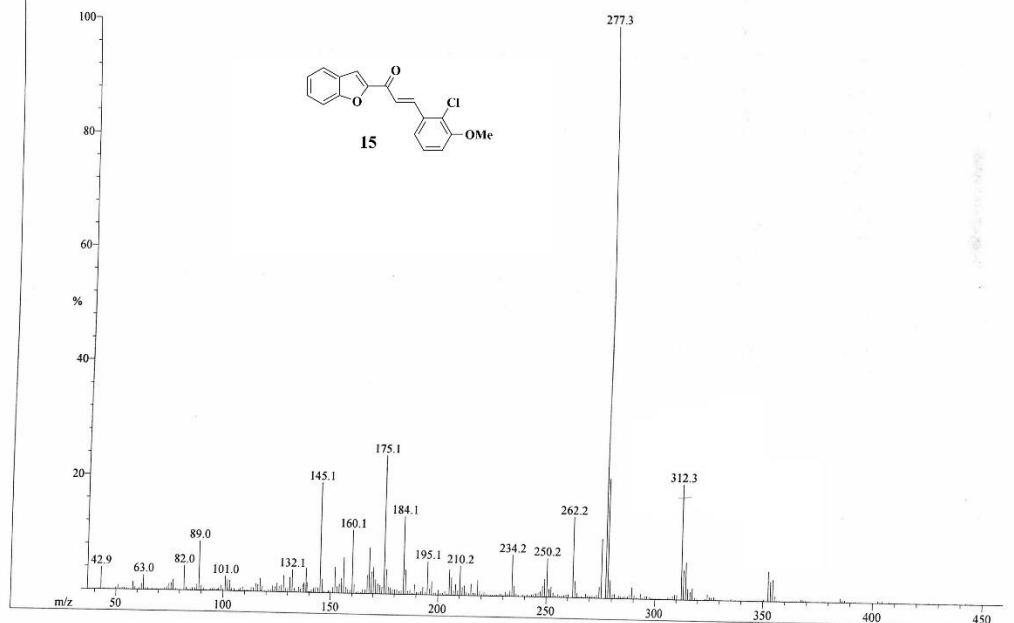

HEJ-ICCBS

11/5/2020 12:14:53 PM

File: GIA-II-6n

Date Run: 11-05-2020 (Time Run: 12:06:12)

Sample: IRFAN ALI /DR. KHALID

Instrument: JEOL 600H-1

Inlet: Direct Probe

Ionization mode: EI+

Run By: MASS LAB-104

Scan: 10

Base: m/z 277; 40.2%FS TIC: 1048158

#Ions: 495

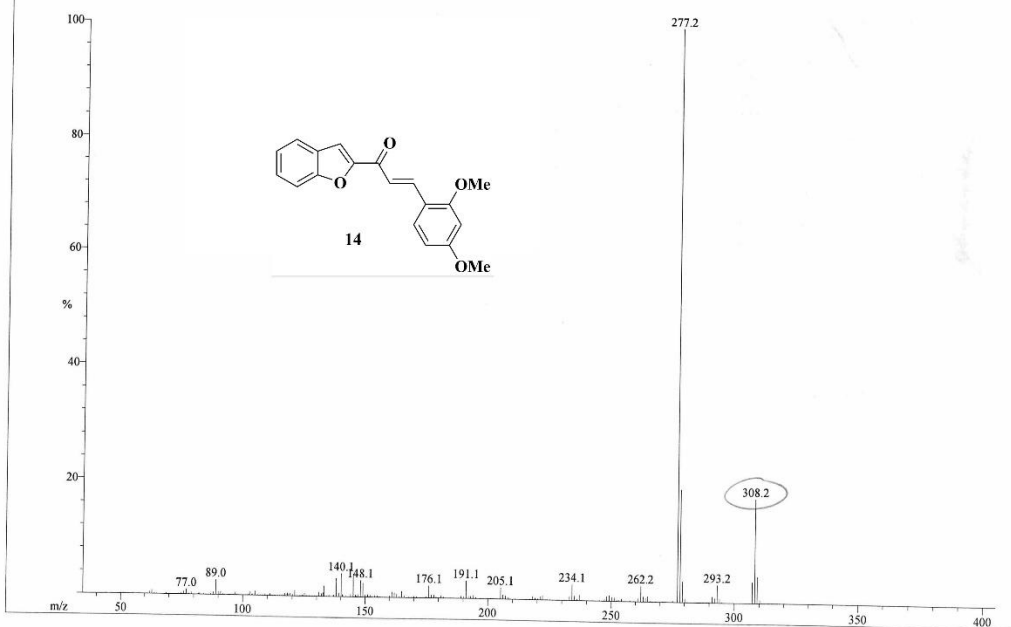



HEJ-ICCBS  
11/10/2020 12:38:47 PM

File: GIA-II-161a  
Sample: IRFAN ALI /DR. KHALID  
Instrument: JEOL 600H-1  
Inlet: Direct Probe

Date Run: 11-10-2020 (Time Run: 12:31:41)

Ionization mode: EI+

Run By: MASS LAB-104

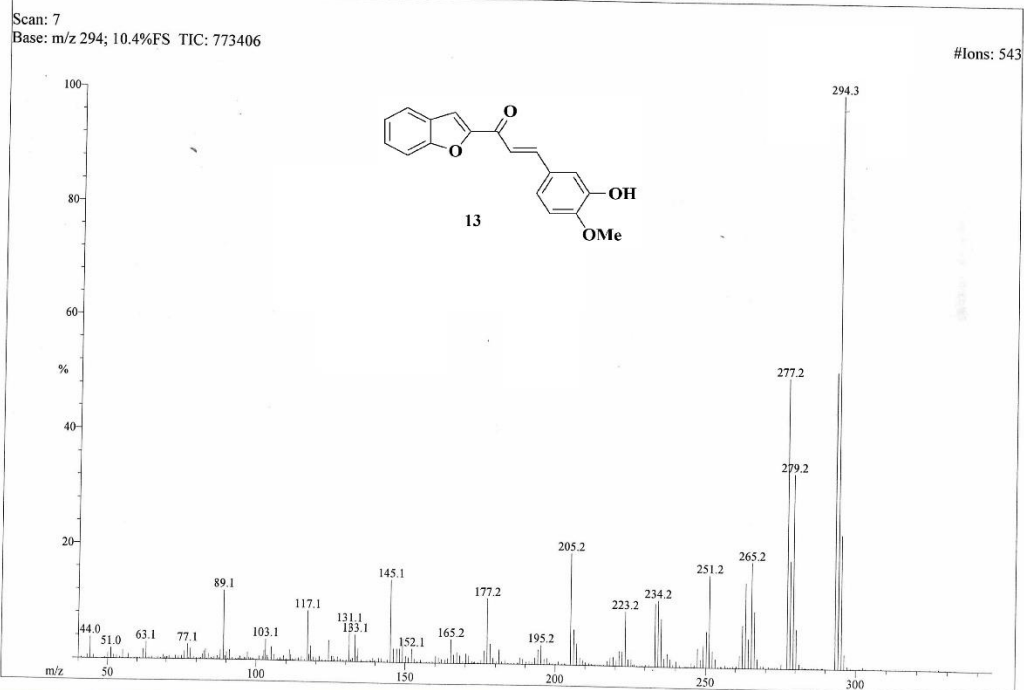

HEJ-ICCBS  
11/25/2020 10:43:40 AM

File: GIA-II-W  
Sample: IRFAN ALI /DR. KHALID  
Instrument: JEOL 600H-1  
Inlet: Direct Probe

Date Run: 11-25-2020 (Time Run: 10:34:16)

Ionization mode: EI+

Run By: MASS LAB-104

Scan: 8

Base: m/z 388; 81.8%FS TIC: 9421484

#Ions: 806

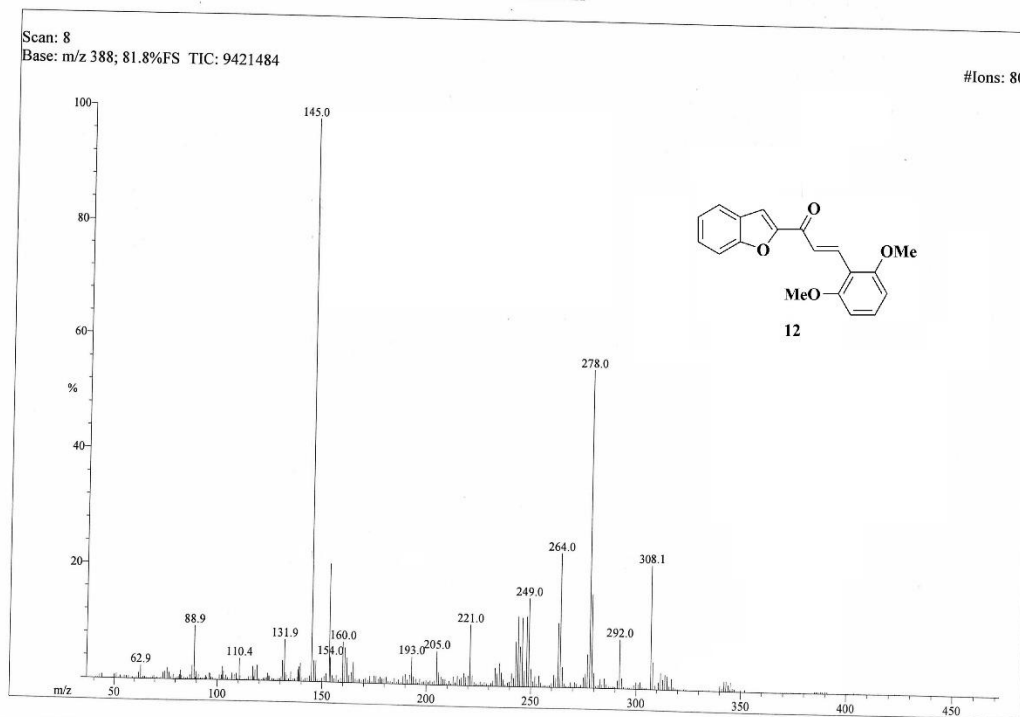

HEJ-ICCBS  
11/10/2020 12:24:59 PM

File: GIA-II-171a  
Sample: IRFAN ALI /DR. KHALID  
Instrument: JEOL 600H-1  
Inlet: Direct Probe

Date Run: 11-10-2020 (Time Run: 12:18:45)

Ionization mode: EI+

Run By: MASS LAB-104

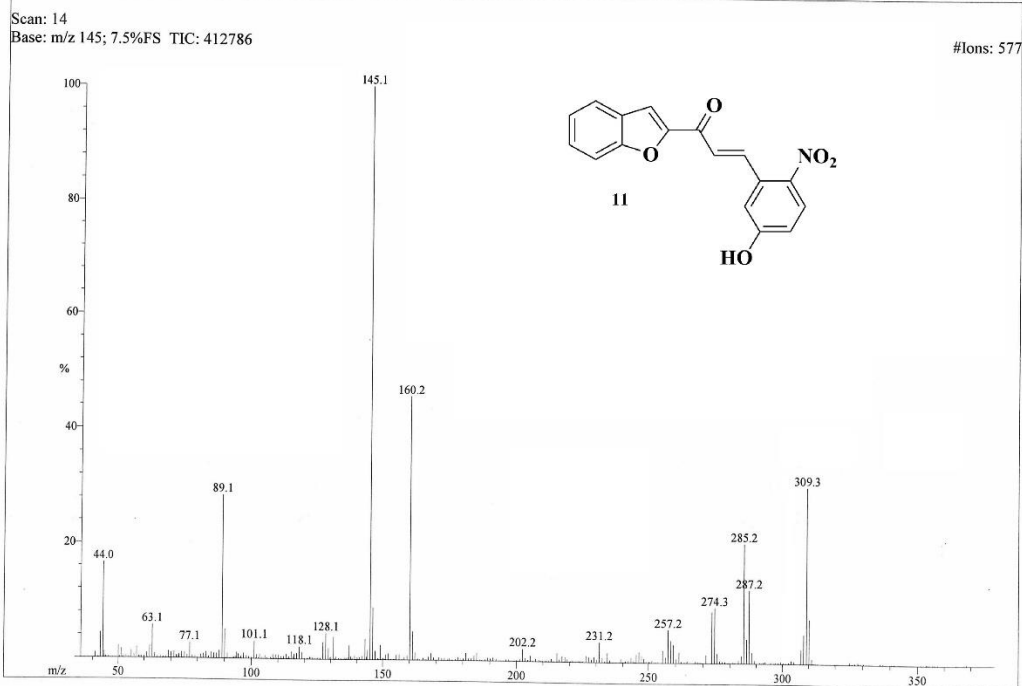

HEJ-ICCBS  
11/21/2020 11:35:12 AM

File: GIA-II-141a-  
Sample: IRFAN ALI/DR. KHALID  
Instrument: JEOL 600H-1  
Inlet: Direct Probe

Date Run: 11-21-2020 (Time Run: 11:20:40)

Ionization mode: EI+

Run By: MASS LAB-104

Scan: 18-21  
Base: m/z 292; 2.2%FS TIC: 278833

#Ions: 1044

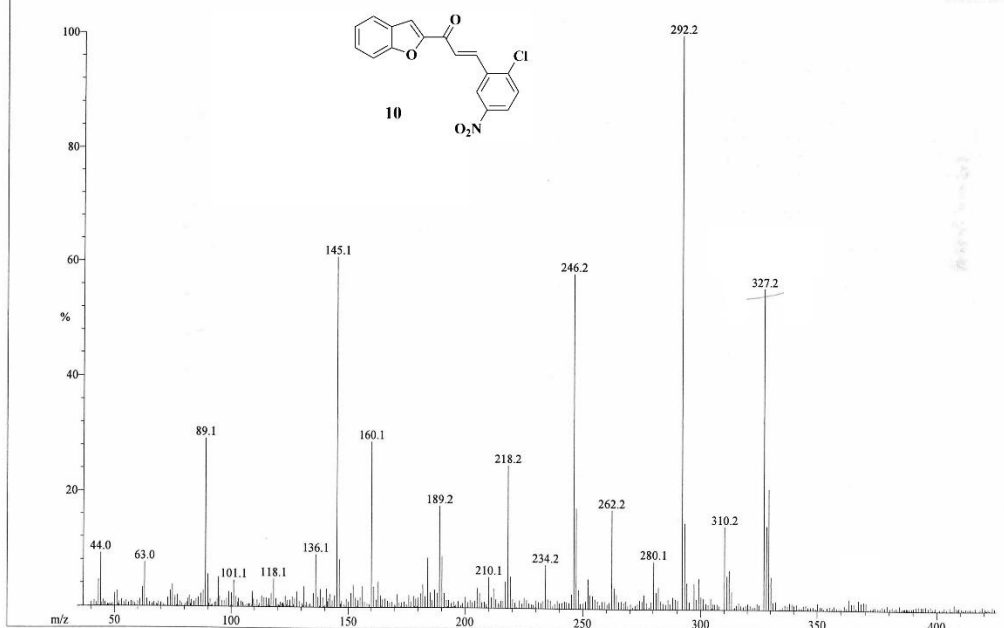

HEJ-ICCBS  
12/15/2020 2:26:36 PM

File: GIA-II-147a  
Sample: IRFAN ALI/DR. KHALID  
Instrument: JEOL 600H-1  
Inlet: Direct Probe

Date Run: 12-15-2020 (Time Run: 14:09:17)

Ionization mode: EI+

Run By: MASS LAB-104

Scan: 26

Base: m/z 262; 15.6%FS TIC: 705386

#Ions: 1021

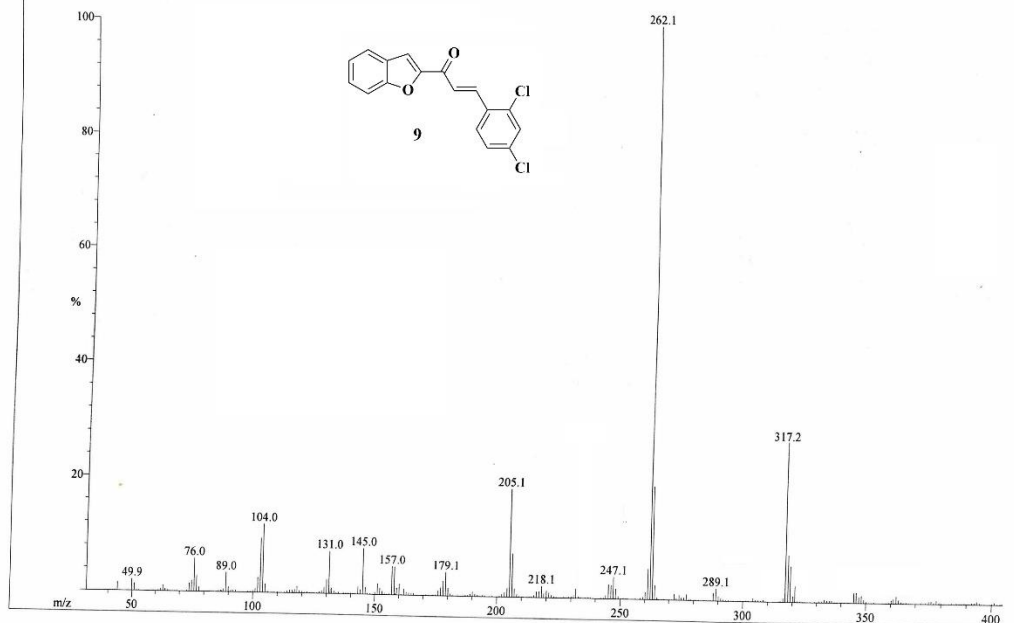

HEJ-ICCBS  
12/15/2020 2:23:46 PM

File: GIA-II-187a  
Sample: IRFAN ALI /DR. KHALID  
Instrument: JEOL 600H-1  
Inlet: Direct Probe

Date Run: 12-15-2020 (Time Run: 14:09:17)

Ionization mode: EI+

Run By: MASS LAB-104

Scan: 18

Base: m/z 247; 36.1%FS TIC: 1511912

#Ions: 780

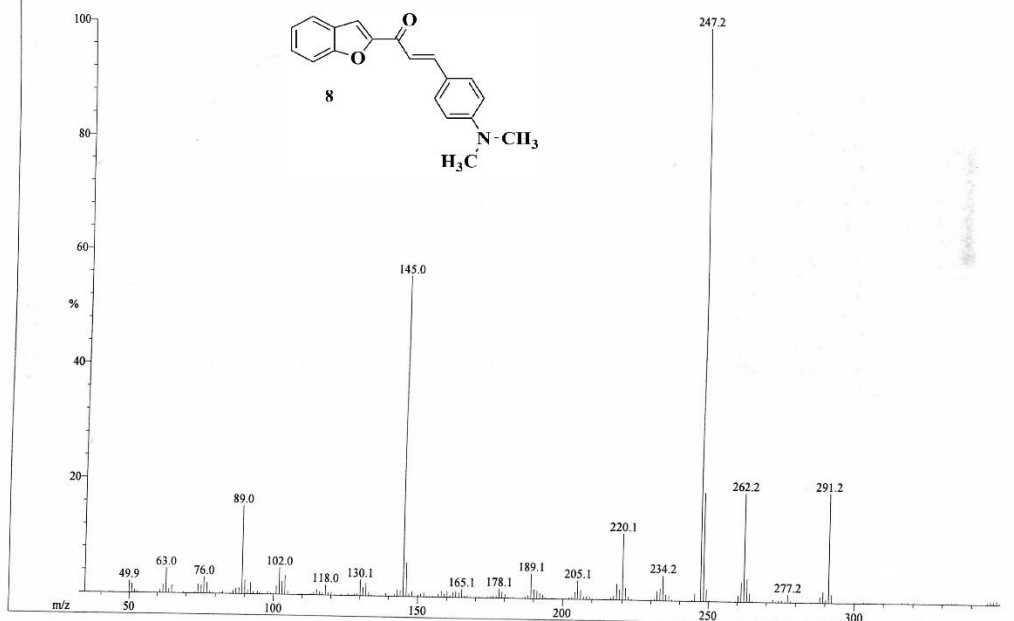

HEJ-ICCBS  
10/8/2021 12:31:43 PM

File: GIA-II-195a  
Sample: IRFAN ALI /PROF. DR. KHALID  
Instrument: JEOL 600H-1  
Inlet: Direct Probe

Date Run: 10-08-2021 (Time Run: 12:22:42)

Ionization mode: EI+

Run By: MASS LAB 104

Scan: 13

Base: m/z 145; 45.1%FS TIC: 3784704

#Ions: 249

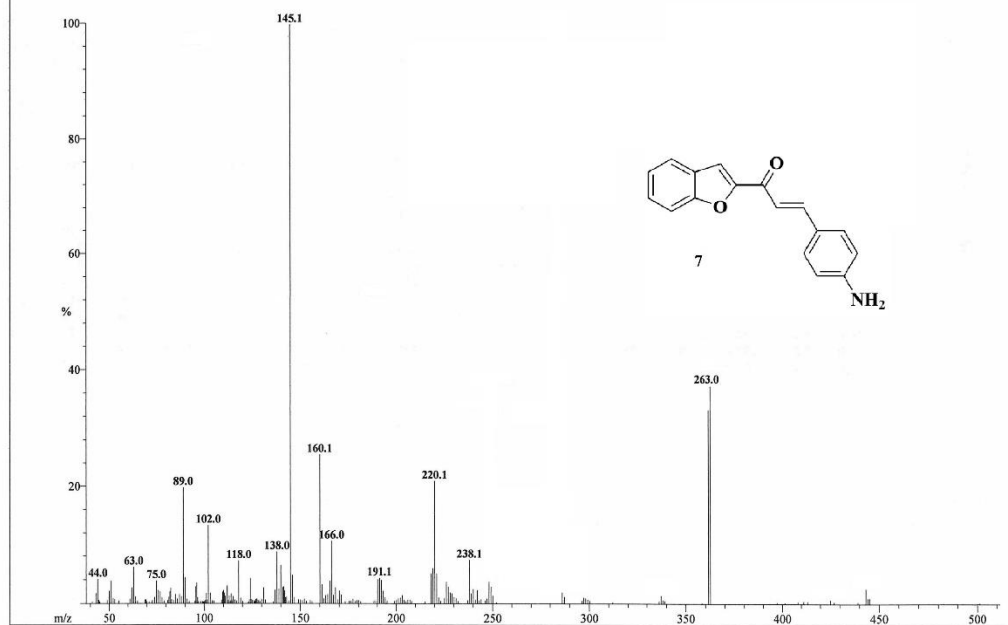

HEJ-ICCBS  
10/6/2021 12:16:43 PM

File: GLA-II-129a  
Sample: IRFAN ALI /PROF. DR. KHALID  
Instrument: JEOL 600H-1  
Inlet: Direct Probe

Date Run: 10-06-2021 (Time Run: 12:11:03)

Ionization mode: EI+

Run By: MASS LAB 104

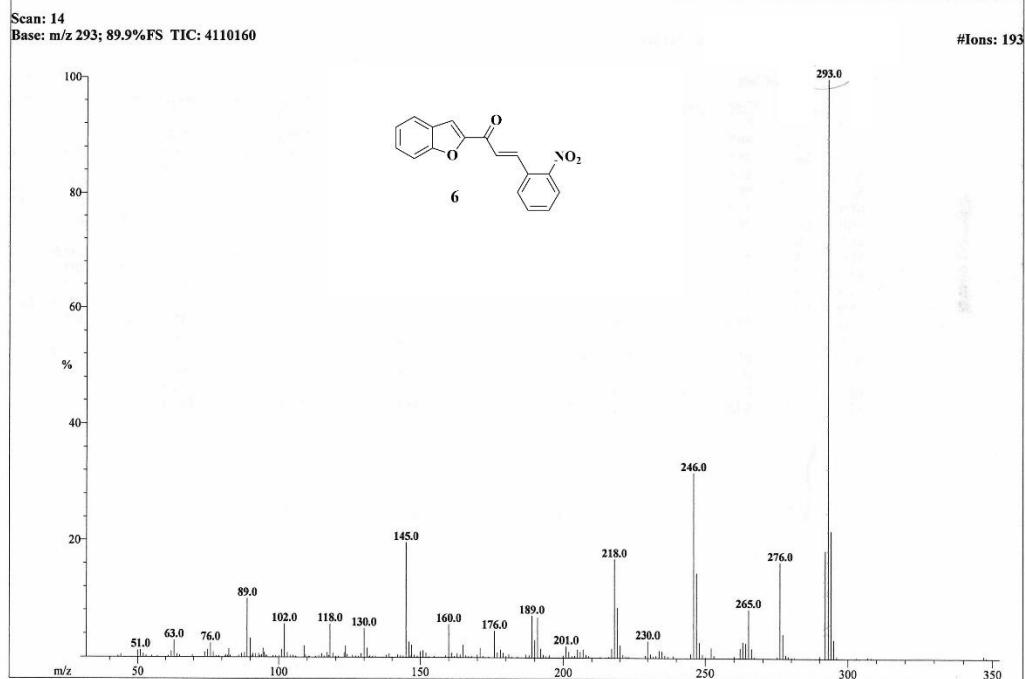



HEJ-ICCBS  
11/10/2020 12:15:19 PM

File: GIA-II-169a  
Sample: IRFAN ALI /DR. KHALID  
Instrument: JEOL 600H-1  
Inlet: Direct Probe

Date Run: 11-10-2020 (Time Run: 12:07:49)

Ionization mode: EI+

Run By: MASS LAB-104

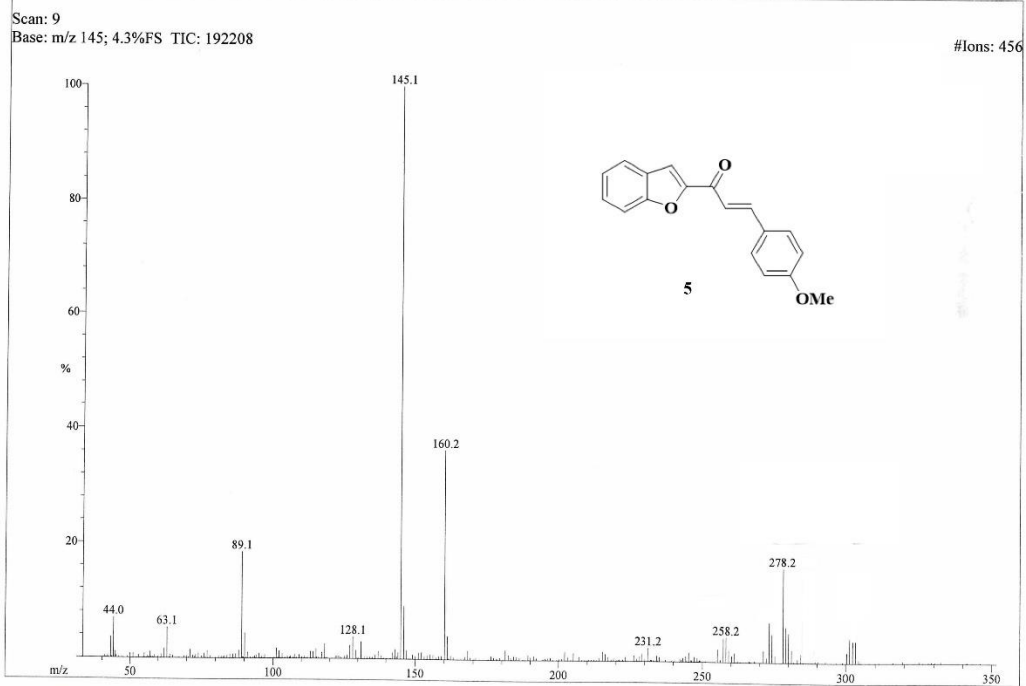

Supplement: Supplementary file 1 [file 1]
