# Supplementary material
Source: publisher figshare collection journal article supplement (https://future-science-group.figshare.com/articles/dataset/_/22116839)
Supplement: Supplementary file 2 [file 1]

Irfan/Dr,Khalid/GIA-II-7a/Dmso/  
1H

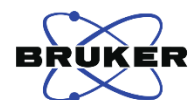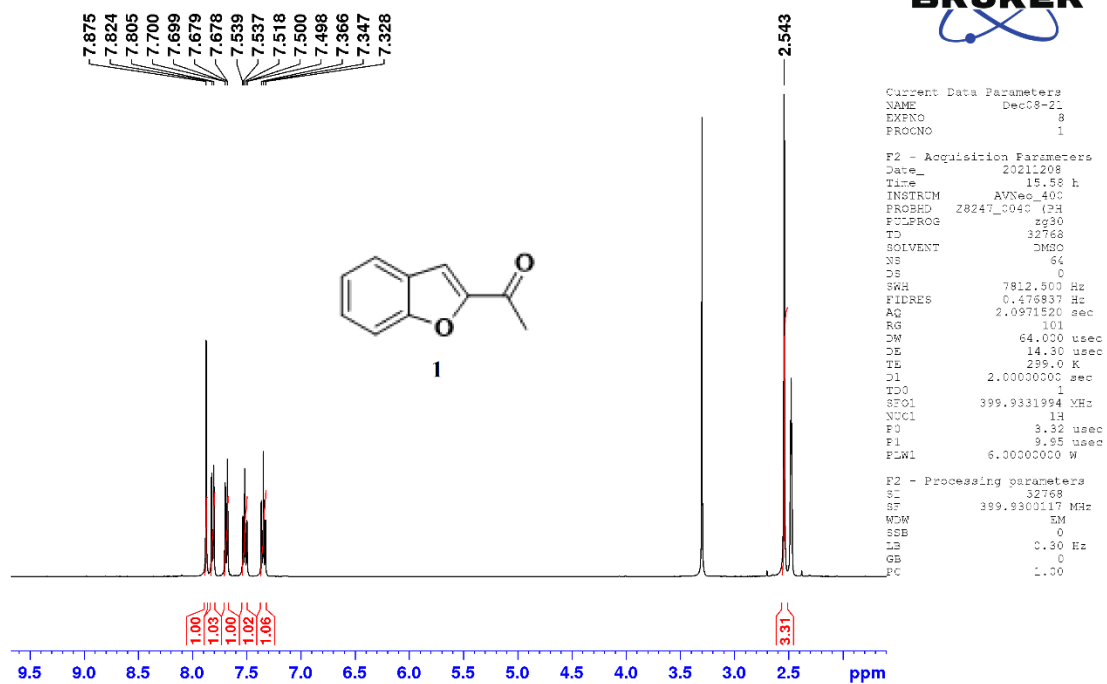

Irfan/Dr,Khalid/GIA-II-189a/DMSO/  
<sup>1</sup>H  
 300K

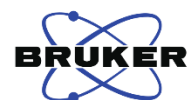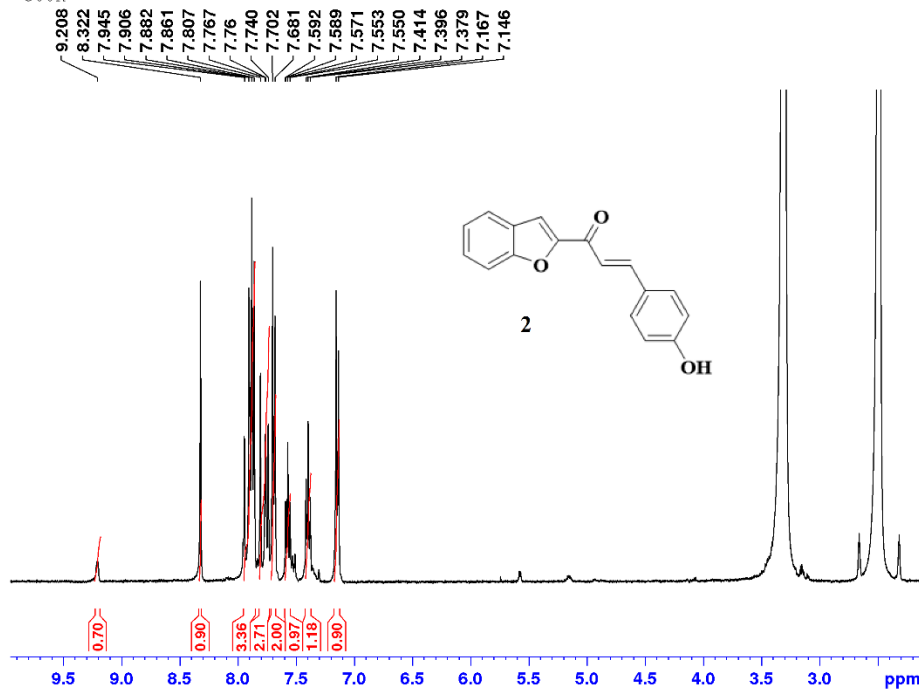

Current Data Parameters  
 NAME Nov09-20  
 EXPNO 6  
 PROCNO 1

F2 - Acquisition Parameters  
 Date\_ 20201109  
 Time 12.06 h  
 INSTRUM AVNec\_400  
 PROBRD z8247\_0040 (PH  
 PULPROG zgpg  
 TD 32768  
 SOLVENT DMSO  
 NS 64  
 DS 4  
 SWH 7912.500 Hz  
 FIDRES 0.476837 Hz  
 AQ 2.0971520 sec  
 RG 101  
 DW 64.000 usec  
 DE 14.30 usec  
 TE 300.0 K  
 D1 1.50000000 sec  
 TDO 1  
 SFO1 399.9331994 MHz  
 NUC1 1H  
 PC 3.32 usec  
 PL 9.95 usec  
 PLW1 6.00000000 W

F2 - Processing parameters  
 SI 65536  
 SF 399.930068 MHz  
 WDW EM  
 SSB 0  
 GB 0  
 CB 0.30 Hz  
 PC 1.00

Irfan Ali/Dr,Khalid/GIA-II-129a/Dmso/  
1H

8.396  
8.326  
8.304  
8.196  
8.174  
8.098  
8.059  
7.925  
7.901  
7.886  
7.774  
7.754  
7.608  
7.588  
7.569  
7.427  
7.408  
7.390

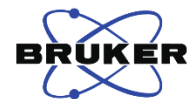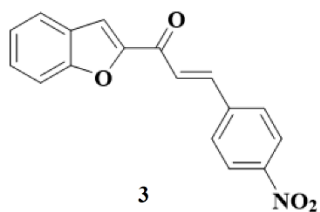

3

Current Data Parameters  
NAME Oct08-21  
EXPNO 4  
PROCNO 1  
  
F2 - Acquisition Parameters  
Date\_ 20211008  
Time\_ 12.06 h  
INSTRUM AVNec\_400  
PROBHD zgpg304C (2H)  
PULPROG zgpg30  
TD 32768  
SOLVENT DMSO  
NS 64  
DS 0  
SWH 7812.500 Hz  
FIDRES 0.476837 Hz  
AQ 2.0971920 sec  
RG 101  
DM 64.000 usec  
DE 14.30 usec  
TE 299.0 K  
D1 1.50000000 sec  
TDO 1  
SFO1 399.9301994 MHz  
NUC1 1H  
PQ 3.32 usec  
PI 9.95 usec  
PLW1 6.00000000 W  
  
F2 - Processing parameters  
SI 32768  
SF 399.9300070 MHz  
WDW EM  
SSB 0  
GB 0.30 Hz  
GB 0  
PC 1.00

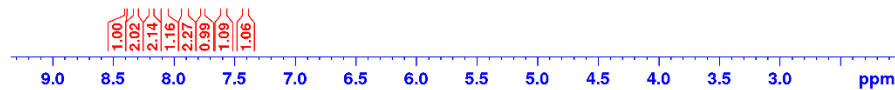

Irfan/Dr,Khalid/GIA-II-145c/DMSO/  
<sup>1</sup>H  
 300K

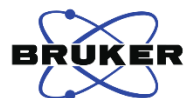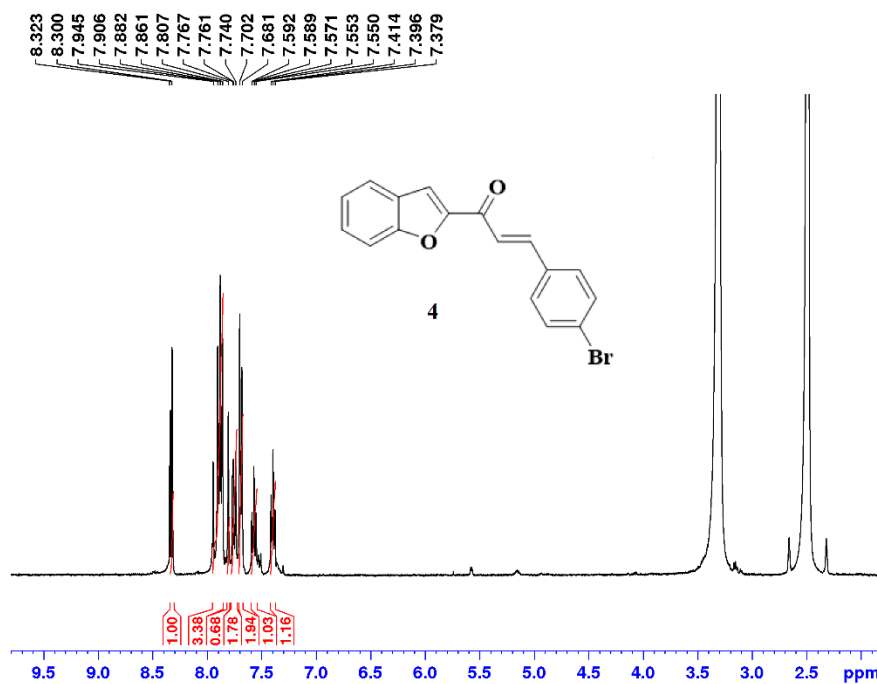

Current Data Parameters  
 NAME Nov09-20  
 EXPNO 6  
 PROCNO 1

F2 - Acquisition Parameters  
 Date\_ 20201109  
 Time 12.35 h  
 INSTRUM AVNec\_400  
 PROBRD z8247\_0040 (P4)  
 PULPROG zgpg30  
 TD 32768  
 SOLVENT DMSO  
 NS 64  
 DS 0  
 SWH 7812.500 Hz  
 FIDRES 0.476837 Hz  
 AQ 2.0971520 sec  
 RG 101  
 DW 64.000 usec  
 DE 14.30 usec  
 TE 300.2 K  
 D1 1.50000000 sec  
 TDO 1  
 SF01 399.9331994 MHz  
 NUC1 1H  
 PC 3.32 usec  
 P1 9.95 usec  
 PLW1 6.00000000 W

F2 - Processing parameters  
 ST 65536  
 SF 399.930068 MHz  
 WDW EM  
 SSB 0  
 GB 0.30 Hz  
 PC 1.00

Irfan/Dr,Khalid/GIA-II-169a/DMSO.

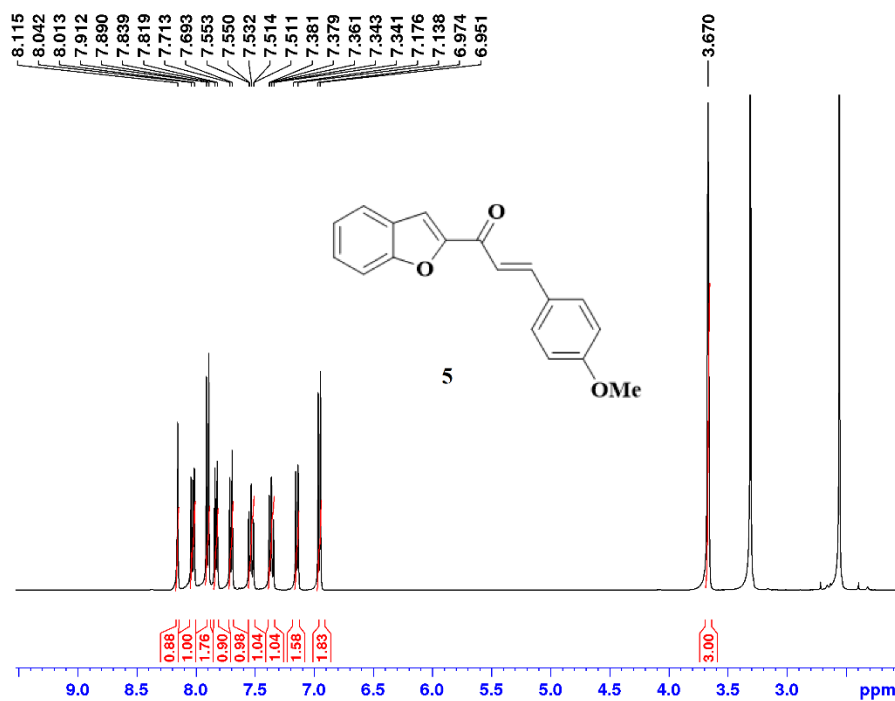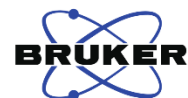

Current Data Parameters  
NAME July16-21  
EXPNO 17  
PROCNO 1

F2 - Acquisition Parameters  
Date\_ 20210716  
Time 17:11 h  
INSTRUM AVNec\_400  
PROBHD 28247\_0040 (PH  
PULPROG zg30  
TD 32768  
SOLVENT DMSO  
NS 64  
DS C  
SWE 7812.500 Hz  
FIDRES 0.476837 Hz  
AQ 2.0971520 sec  
RG 1.00  
DW 64.000 usec  
DE 14.30 usec  
TE 299.1 K  
D1 1.50000000 sec  
D11 1  
SFO1 399.9330994 MHz  
NUC1 1H  
P0 3.32 usec  
PL 9.95 usec  
PLW1 6.00000000 W

F2 - Processing parameters  
SI 32768  
SF 399.9330994 MHz  
WDW EM  
SSB C  
LB 0.30 Hz  
GB C  
PC 1.00

Irfan/Dr,Khalid/GIA-II-143a/Dmsd/

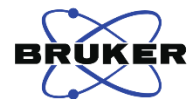

8.352  
8.207  
8.187  
8.125  
8.104  
8.084  
8.045  
7.951  
7.928  
7.925  
7.910  
7.893  
7.865  
7.854  
7.847  
7.828  
7.772  
7.754  
7.722  
7.700  
7.565  
7.557  
7.544  
7.537  
7.523  
7.406  
7.386  
7.367  
7.349

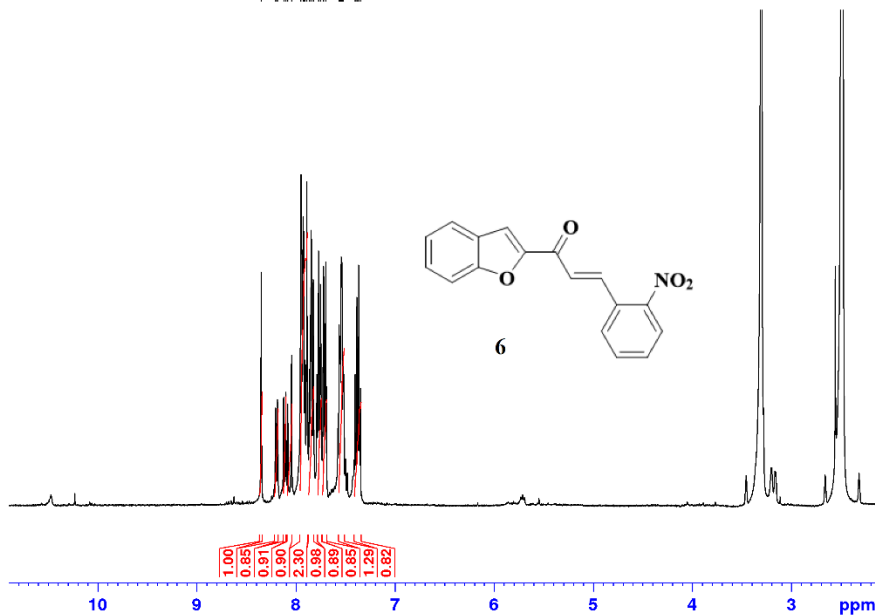

Current Data Parameters  
NAME July27-21  
EXPNO 8  
PROCNO 1

F2 - Acquisition Parameters  
Date\_ 20210727  
Time 13.10 h  
INSTRUM AVNec\_400  
PROBHD Z8247\_0040 (2H  
PULPROG zgpg30  
TD 32768  
SOLVENT DMSO  
NS 64  
DS 0  
SWH 7812.500 Hz  
FIDRES 0.476837 Hz  
AQ 2.0971520 sec  
RG 101  
DM 64.000 usec  
DE 14.30 usec  
TE 299.0 K  
D1 2.00000000 sec  
TD0 1  
SFO1 399.9331994 MHz  
NUC1 1H  
P0 3.32 usec  
P1 9.95 usec  
PLW1 6.00000000 W

F2 - Processing parameters  
SI 32768  
SF 399.9300668 MHz  
WDW EM  
SSB 0  
LB 0.30 Hz  
GB 0  
PC 1.00

Irfan/Dr,Khalid/GIA-II-195a/DMSO/  
<sup>1</sup>H  
 300K

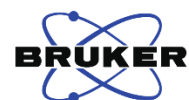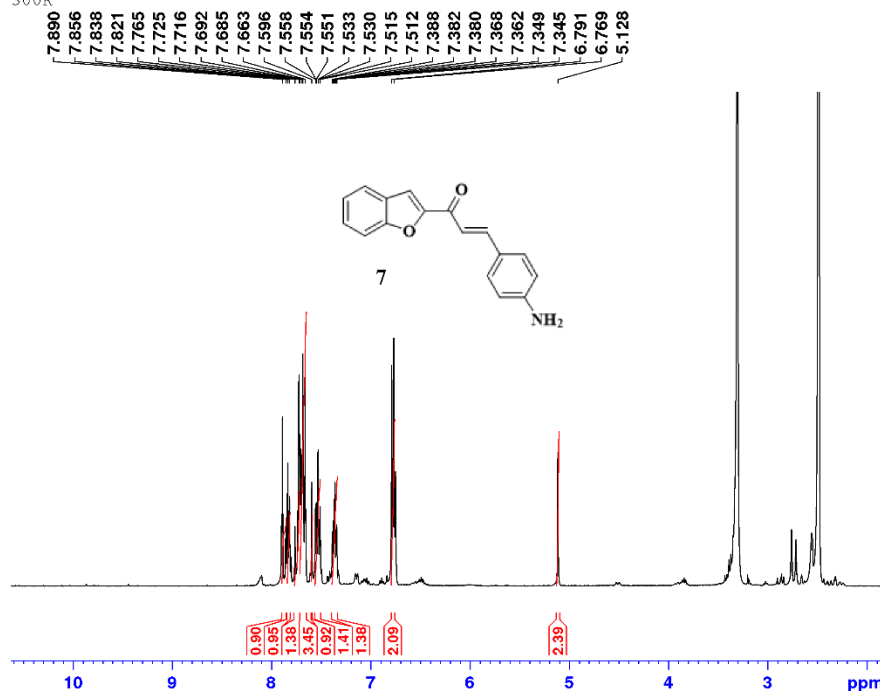

Current Data Parameters  
 NAME Nov6-20  
 EXPNO 2  
 PROCNO 1

F2 - Acquisition Parameters  
 Date\_ 20201116  
 Time 12.32 h  
 INSTRUM AVNec\_400  
 PROBHD zgpg30  
 PULPROG zgpg30  
 TD 32768  
 SOLVENT DMSO  
 NS 64  
 DS 0  
 SWH 7812.500 Hz  
 FIDRES 0.476837 Hz  
 AQ 2.0971520 sec  
 RG 101  
 DW 64.000 usec  
 DE 14.30 usec  
 TE 300.2 K  
 D1 2.00000000 sec  
 TD0 1  
 SFO1 399.9331994 MHz  
 NUC1 1H  
 P0 3.32 usec  
 P1 9.95 usec  
 PLW1 6.00000000 W

F2 - Processing parameters  
 ST 65536  
 SF 399.9300070 MHz  
 WDW EM  
 SSB 0  
 GB 0.30 Hz  
 PC 1.00

Irfan/Dr,Khalid/GIA-I-187a/DMSO/  
<sup>1</sup>H  
 300K

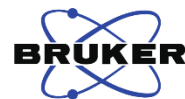

7.892  
7.856  
7.838  
7.737  
7.725  
7.716  
7.703  
7.692  
7.685  
7.680  
7.663  
7.558  
7.551  
7.533  
7.530  
7.515  
7.512  
7.388  
7.368  
7.362  
7.349  
7.345  
6.791  
6.773  
6.751

3.034  
3.017

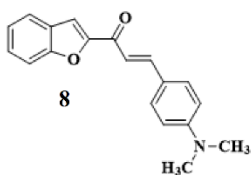

Current Data Parameters  
 NAME Nov16-20  
 EXPNO 2  
 PROCNO 1  
 F2 - Acquisition Parameters  
 Date\_ 20201116  
 Time 12.33 h  
 INSTRUM AVNec\_400  
 PROBRD 28247\_0040 (PH)  
 PULPROG zg30  
 TD 32768  
 SOLVENT DMSO  
 NS 64  
 DS 4  
 SWH 7812.500 Hz  
 FIDRES 0.476837 Hz  
 AQ 2.0971520 sec  
 RG 101  
 DW 64.000 usec  
 DE 14.30 usec  
 TE 300.0 K  
 D1 2.00000000 sec  
 TD0 1  
 SFO1 399.9331994 MHz  
 NUC1 <sup>1</sup>H  
 P0 3.32 usec  
 F1 9.95 usec  
 PLW1 6.00000000 W  
 F2 - Processing parameters  
 SI 65536  
 SF 399.930070 MHz  
 WDW EM  
 SSB 0  
 LB 0.30 Hz  
 GB 0  
 PC 1.00

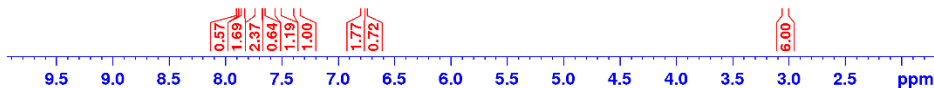



Irfan/Dr, Khalid/GIA-II-131a/DMSO/  
1H

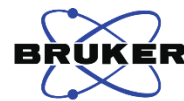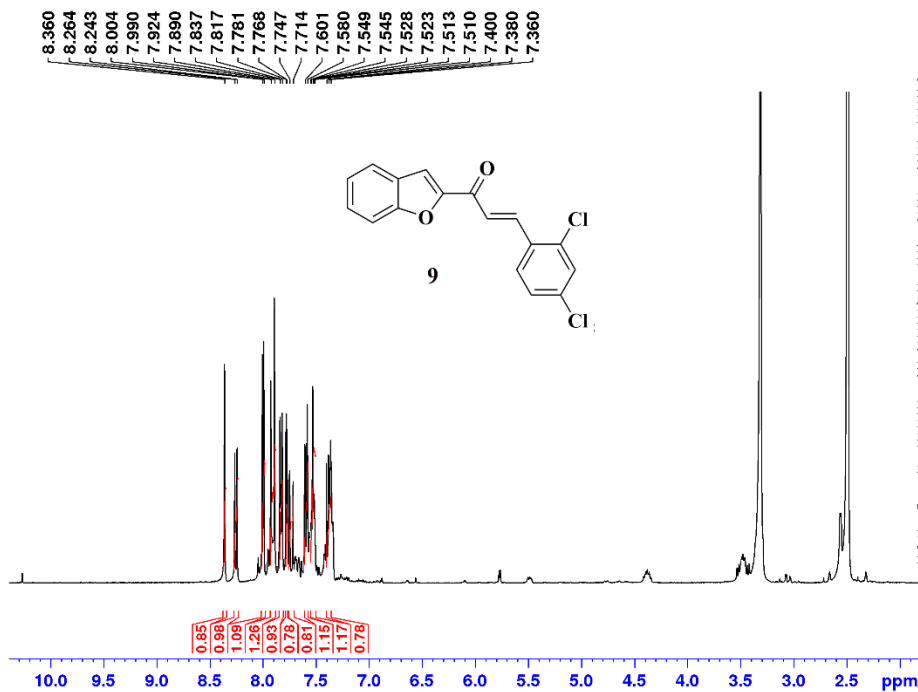

Current Data Parameters  
NAME Oct06-21  
EXPNO 1  
PROCNO 1

F2 - Acquisition Parameters  
Date\_ 2021006  
Time 12.11 h  
INSTRUM AVNeo\_400  
PROBHD Z8247\_004C (2H  
PULPROG zgpg30  
TD 32768  
SOLVENT DMSO  
NS 64  
DS 0  
SWH 7812.500 Hz  
FIDRES 0.476837 Hz  
AQ 2.0971520 sec  
RG 101  
DM 64.000 usec  
DE 14.30 usec  
TE 299.0 K  
D1 2.0000000 sec  
TD0 1  
SFO1 399.9331994 MHz  
NUC1 1H  
PC 3.32 usec  
P1 9.95 usec  
PLW1 6.0000000 W

F2 - Processing parameters  
SI 32768  
SF 399.9330073 MHz  
WDW EM  
SSB 0  
LB 0.30 Hz  
GB 0  
PC 1.00

Irfan/Dr,Khalid/GIA-II-175a/Dmsd/  
1H  
300K

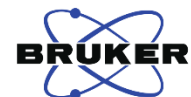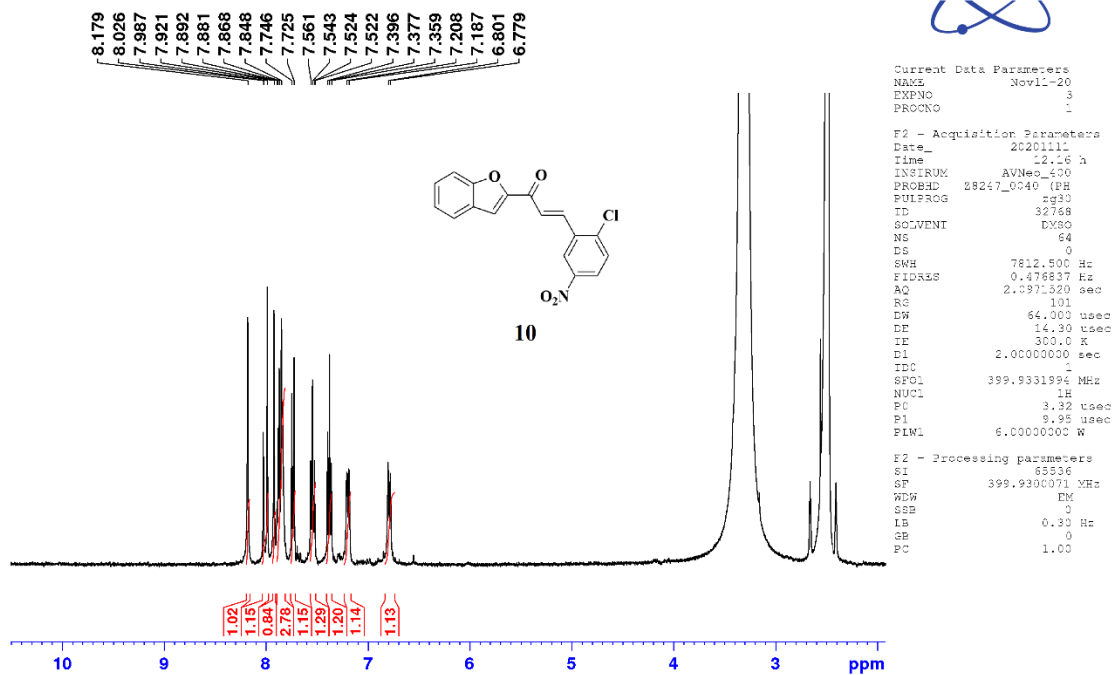

Irfan/Dr,Khalid/GIA-II-171a/DMSO.

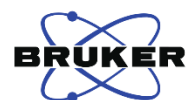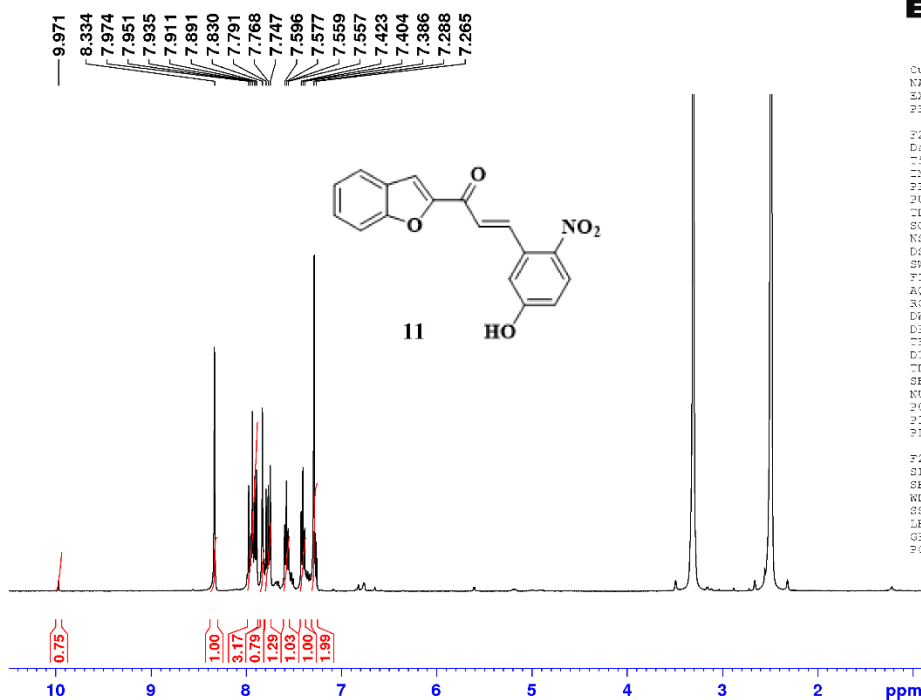

Current Data Parameters  
NAME July16-21  
EXPNO 16  
PROCNO 1

F2 - Acquisition Parameters  
Date\_ 20210716  
Time 16.54 h  
INSTRUM AVNec\_400  
PROBHD 28247\_0040 (PH  
PULPROG zgpg  
TD 32768  
SOLVENT DMSO  
NS 128  
DS 0  
SWH 7812.500 Hz  
FIDRES 0.476837 Hz  
AQ 2.0971520 sec  
RG 101  
DW 64.000 usec  
DE 14.30 usec  
TE 298.2 K  
DL 1.50000200 sec  
TD0 1  
SF01 399.9331994 MHz  
NUC1 1H  
PC 3.32 usec  
PC 9.93 usec  
PLW1 6.00000000 W

F2 - Processing parameters  
SI 32768  
SF 399.9330070 MHz  
WDW EX  
SSB C  
LB 0.30 Hz  
GB C  
PC 1.00

IRFAN / DR.KHALID / GIA-II-171 / DMSO  
BB

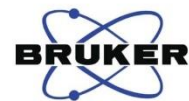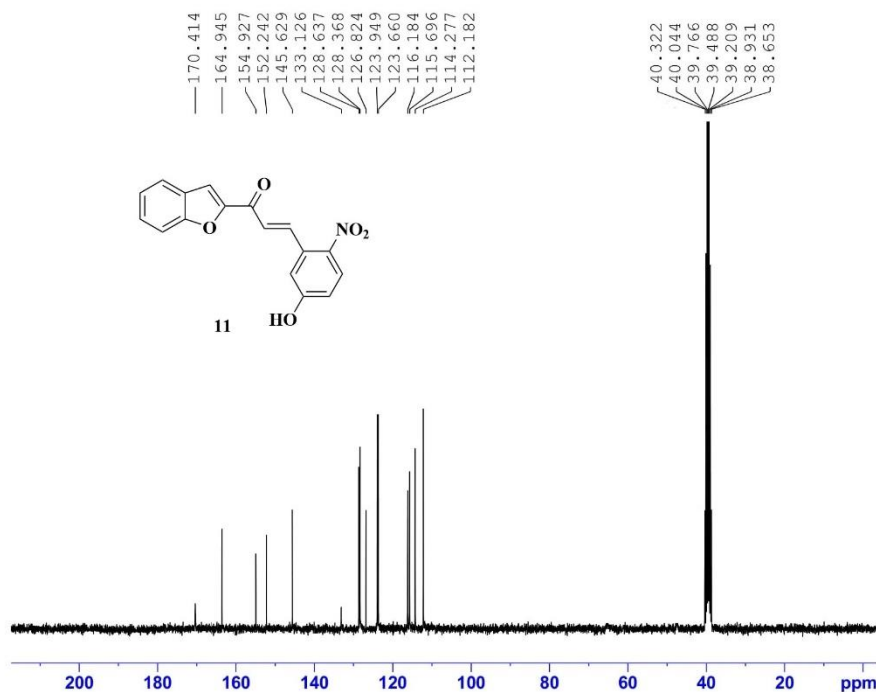

Current Data Parameters  
NAME GIA-II-171  
EXPNO 2  
PROCNO 1

F2 - Acquisition Parameters  
Date\_ 20220730  
Time 6.09 h  
INSTRUM Avance Neo 300  
PROBHD Z8284\_0948 (PH  
PULPROG zgpg  
TD 32768  
SOLVENT DMSO  
NS 16384  
DS 8  
SWH 17857.143 Hz  
FIDRES 1.089913 Hz  
AQ 0.9175040 sec  
RG 12.5649  
DW 28.000 usec  
DE 12.00 usec  
TE 300.0 K  
D1 2.00000000 sec  
D11 0.03000000 sec  
TD0 16  
SF01 75.4764278 MHz  
NUC1 13C  
P1 10.00 usec  
PLW1 53.07400131 W  
SF02 300.1312005 MHz  
NUC2 1H  
CPDPRG[2] waltz65  
PCPD2 90.00 usec  
PLW2 8.72920036 W  
PLW12 0.24247999 W  
PLW13 0.12196000 W

F2 - Processing parameters  
SI 16384  
SF 75.4677869 MHz  
WDW EM  
SSB 0  
LB 1.00 Hz  
GB 0  
PC 1.00

Irfan/Dr,Khalid/GIA-II-165a/Dmsd/

8.223  
8.183  
8.000  
7.988  
7.960  
7.864  
7.844  
7.757  
7.736  
7.566  
7.565  
7.546  
7.528  
7.438  
7.417  
7.397  
7.380  
7.361  
6.772  
6.750

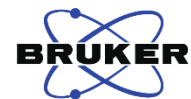

Current Data Parameters  
NAME July26-21  
EXPNO 3  
PROCNO 1

F2 - Acquisition Parameters  
Date\_ 20210726  
Time 10.28 h  
INSTRUM AVNec\_400  
PROBHD 28247\_004C (2H)  
PULPROG zg30  
TD 32768  
SOLVENT DMSO  
NS 64  
DS 0  
SWH 7812.500 Hz  
FIDRES 0.476837 Hz  
AQ 2.0971520 sec  
RG 101  
DM 64.000 usec  
DE 14.30 usec  
TE 299.3 K  
D1 2.0000000 sec  
TDO 1  
SFO1 399.9331994 MHz  
NUC1 1H  
P0 3.32 usec  
F1 9.95 usec  
PLW1 6.0000000 W

F2 - Processing parameters  
S 32768  
SF 399.9300668 MHz  
WDW EM  
SSE 0  
LB 0.30 Hz  
GB 0  
PC 1.00

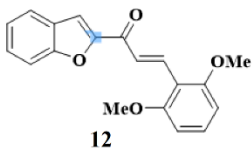

12

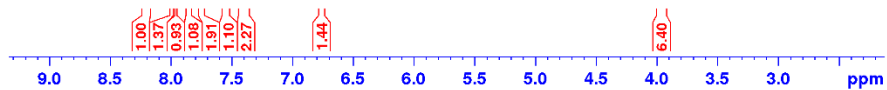

IRFAN / DR.KHALID / GIA-II-165a / DMSO  
BB

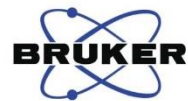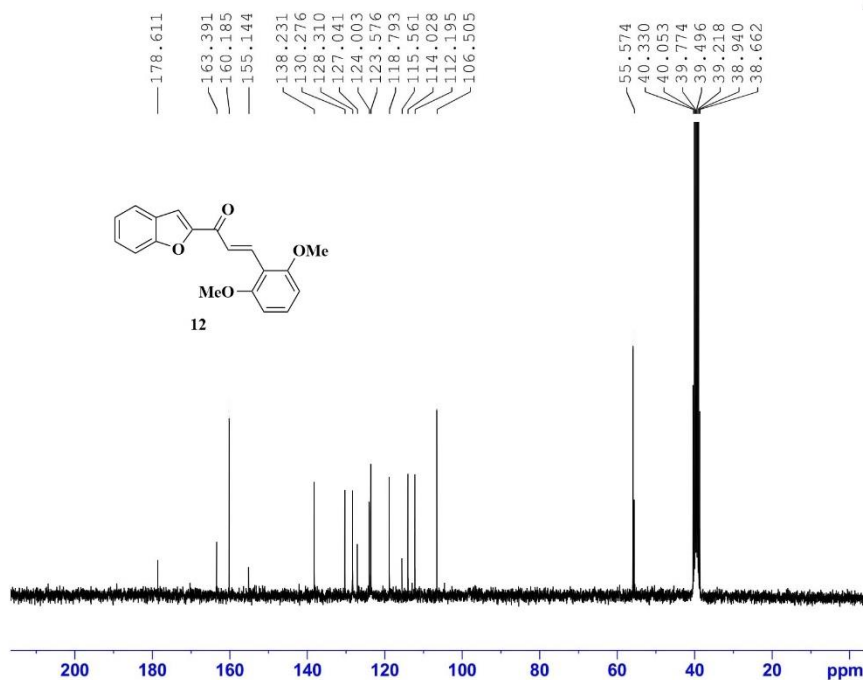

Current Data Parameters  
NAME GIA-II-165a  
EXPNO 2  
PROCNO 1

F2 - Acquisition Parameters  
Date\_ 20220723  
Time 4.43 h  
INSTRUM Avance Neo 300  
PROBHD Z8284\_0948 (PH)  
PULPROG zgpg  
TD 32768  
SOLVENT DMSO  
NS 20480  
DS 8  
SWH 17857.143 Hz  
FIDRES 1.089913 Hz  
AQ 0.9175040 sec  
RG 12.5649  
DW 28.000 usec  
DE 12.00 usec  
TE 300.0 K  
D1 2.00000000 sec  
D11 0.03000000 sec  
TDO 20  
SFO1 75.4764278 MHz  
NUC1 13C  
P1 10.00 usec  
PLW1 53.07400131 W  
SFO2 300.1312005 MHz  
NUC2 1H  
CPDPRG[2] waltz65  
PCPD2 90.00 usec  
PLW2 8.72920036 W  
PLW12 0.24247999 W  
PLW13 0.12196000 W

F2 - Processing parameters  
SI 16384  
SF 75.4677869 MHz  
WDW EM  
SSB 0  
LB 1.00 Hz  
GB 0  
PC 1.00

Irfan/Dr, Khalid/GIA-II-161a/DMSO/  
<sup>1</sup>H  
 300K

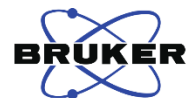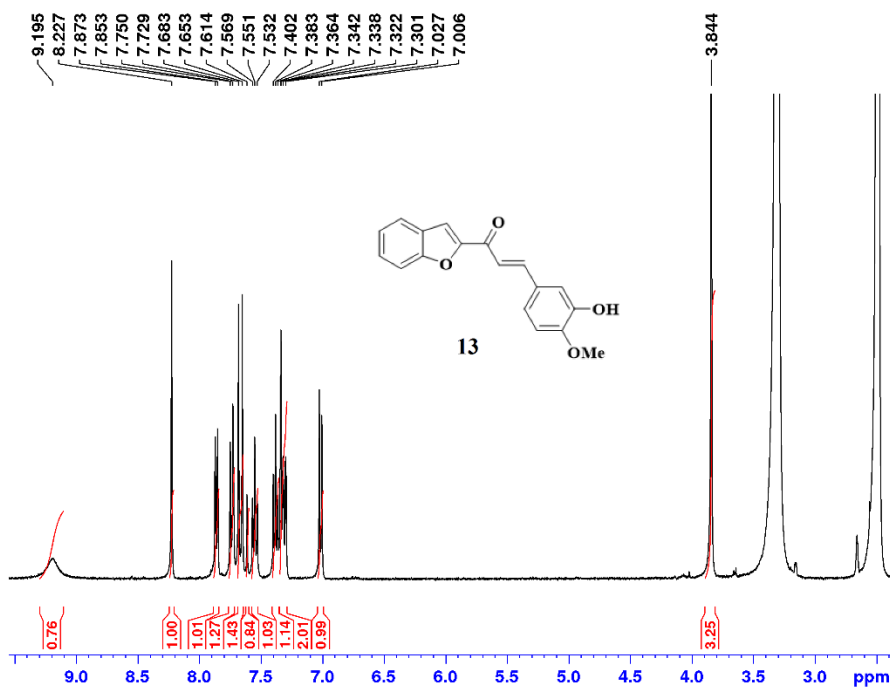

Current Data Parameters  
 NAME Nov09-20  
 EXPNO 4  
 PROCNO 1

F2 - Acquisition Parameters  
 Date\_ 20201108  
 Time 12.48 h  
 INSTRUM AVNeo\_400  
 PROSED Z824T\_0040 (PH  
 PULPROG zg30  
 TD 32768  
 SOLVENT DMSO  
 NS 64  
 DS C  
 SWH 7812.500 Hz  
 FIDRES 0.476937 Hz  
 AQ 2.0971520 sec  
 RG 101  
 DW 64.000 usec  
 DE 14.30 usec  
 TE 300.0 K  
 D1 1.30000000 sec  
 TDO 1  
 SFO1 399.9301994 MHz  
 NUC1 <sup>1</sup>H  
 P0 3.32 usec  
 P1 9.95 usec  
 PLW1 6.00000000 W

F2 - Processing parameters  
 SI 65536  
 SF 399.9300066 MHz  
 WDW EM  
 SSB 0  
 LB 0.30 Hz  
 GB C  
 FC 1.00

Irfan/Dr, Khalid/GIS-II-6n/DMSO/  
 1H  
 300K

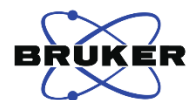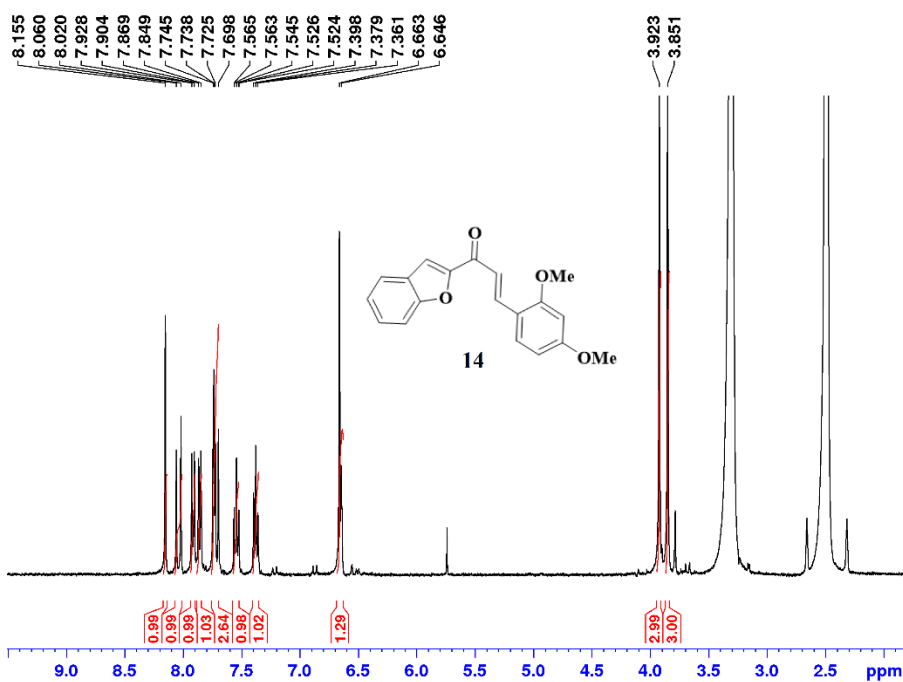

Current Data Parameters  
 NAME Nov06-20  
 EXPNO 6  
 PROCNO 1

F2 - Acquisition Parameters  
 Date\_ 20201106  
 Time 11.36 h  
 INSTRUM AVNec\_400  
 PROBHD 28247\_0040 (PH  
 PULPROG zgpg30  
 TD 32768  
 SOLVENT DMSO  
 NS 64  
 DS 4  
 SWE 7812.300 Hz  
 FIDRES 0.476837 Hz  
 AQ 2.0971520 sec  
 RG 101  
 DW 64.000 usec  
 DE 14.30 usec  
 TE 300.0 K  
 D1 1.30000000 sec  
 TDO 1  
 SFO1 399.931994 MHz  
 NUCL 1H  
 FO 300.132 usec  
 PC 9.93 usec  
 PLW1 6.0000000 W

F2 - Processing parameters  
 SI 65536  
 SF 399.930071 MHz  
 WDW EM  
 SSB 0  
 LB 0.30 Hz  
 GB 0  
 PC 1.00



Irfan/Dr,Khalid/GIA-II-137a/Dmsd/

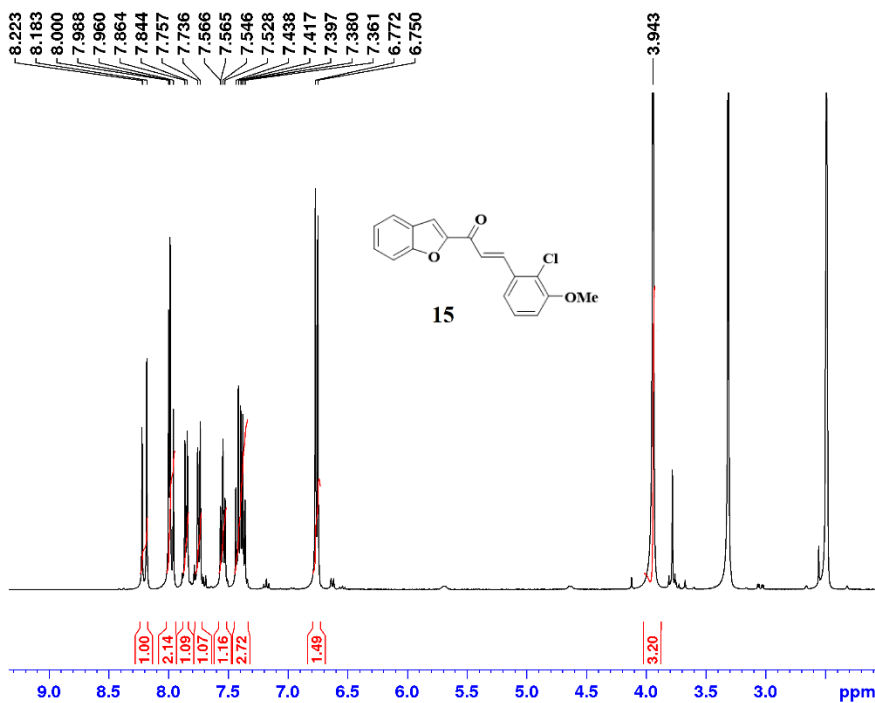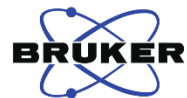

Current Data Parameters

NAME July26-21  
EXPNO 3  
PROCNO 1

F2 - Acquisition Parameters

Date\_ 20210726  
Time 10.28 h  
INSTRUM AVNeo\_400  
PROBHD zgpg30 (PH  
PULPROG zgpg30  
TD 32768  
SOLVENT DMSO  
NS 64  
DS 0  
SWH 7812.500 Hz  
FIDRES 0.476837 Hz  
AQ 2.0971520 sec  
RG 101  
DM 64.000 usec  
DE 14.30 usec  
TE 299.3 K  
D1 2.00000000 sec  
TD0 1  
SFO1 399.9301994 MHz  
NUC1 13  
PC 3.32 usec  
PI 9.95 usec  
PLW1 6.00000000 W

F2 - Processing parameters

SI 32768  
SF 399.9300068 MHz  
WDW EM  
SSB 0  
GB 0.30 Hz  
CB 0  
PC 1.00

IRFAN ALI/DR, KHALID/GIA-I-139a/DMSO/  
BB

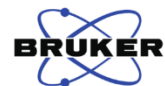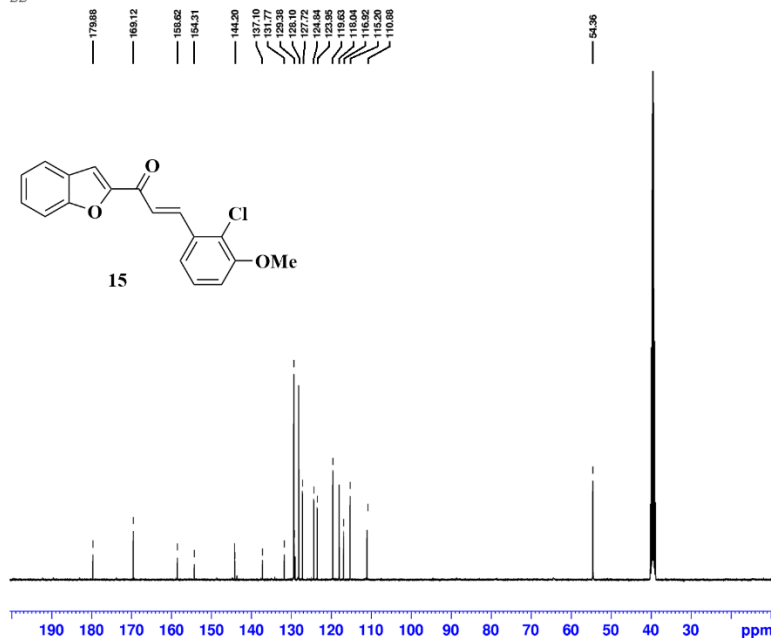

Current Data Parameters  
NAME Sep25-19  
EXPNO 7  
PROCNO 1

F2 - Acquisition Parameters  
Date\_ 20190926  
Time 7.20 h  
INSTRUM Avance NEO 400MHz  
PROBHD Z114854\_0013 (4  
PULPROG zgpg  
TD 32768  
SOLVENT DMSO  
NS 18432  
DS 8  
SWH 23809.523 Hz  
FIDRES 1.453214 Hz  
AQ 0.6881280 sec  
RG 23.4375  
DM 21.000 usec  
DE 6.50 usec  
TE 300.8 K  
D1 2.00000000 sec  
D11 0.03000000 sec  
TDO 18  
SFO1 100.6243395 MHz  
NUC1 13C  
P1 10.00 usec  
PLM1 56.43000031 W  
SFO2 400.1316005 MHz  
NUC2 1H  
CPDPRG2 waltz163  
PCPD2 90.00 usec  
PLM2 13.21300030 W  
PLM12 0.31972000 W  
PLM13 0.16080999 W

F2 - Processing parameters  
SI 32768  
SF 100.6128199 MHz  
WDW EM  
SSB 0  
LB 1.00 Hz  
GB 0  
PC 1.40

Irfan/Dr,Khalid/GIS-II-141a /DMSO/  
<sup>1</sup>H  
 300K

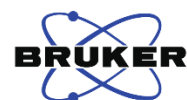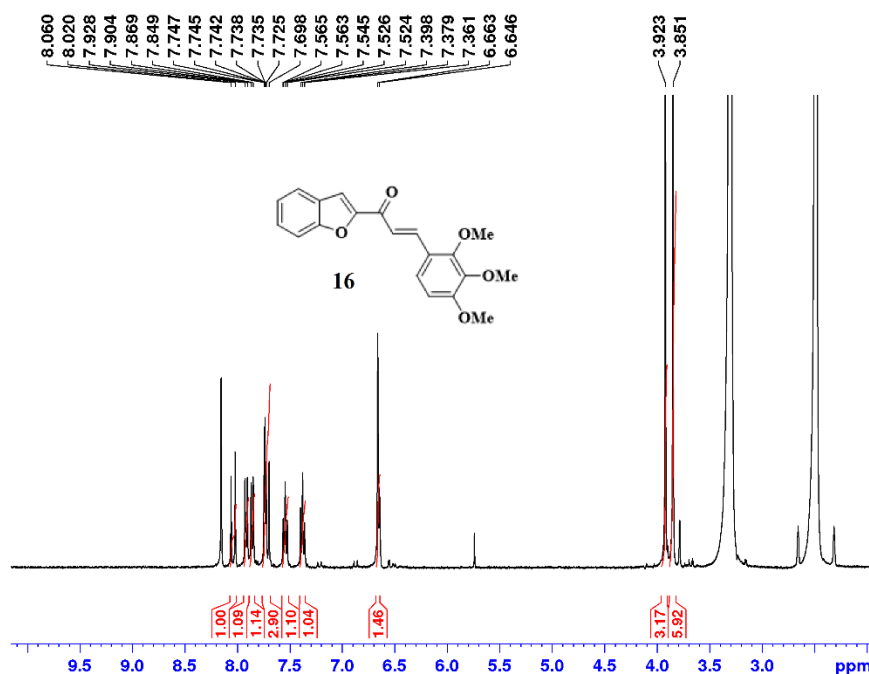

Current Data Parameters  
 NAME Nov06-20  
 EXPNO 6  
 PROCNO 1

F2 - Acquisition Parameters  
 Date\_ 20201106  
 Time 11:36 h  
 INSTRUM AVXSec\_400  
 PROBHD 28247\_0040 (2H)  
 PULPROG zg30  
 TD 32768  
 SOLVENT DMSO  
 NS 64  
 DS 0  
 SWH 7812.500 Hz  
 FIDRES 0.476837 Hz  
 AQ 2.0971520 sec  
 RG 101  
 DW 64.000 usec  
 DE 14.30 usec  
 TE 300.0 K  
 D1 1.50000050 sec  
 TDO 1  
 SFO1 399.9331994 MHz  
 NUC1 1H  
 FO 3.32 usec  
 FI 9.85 usec  
 PLW1 6.00000000 W

F2 - Processing parameters  
 SI 65536  
 SF 399.9300071 MHz  
 WDW EM  
 SSB 0  
 LB 0.30 Hz  
 GB 0  
 PC 1.00

Irfan Ali/Dr,Khalid/GIA-II-191a/Cd3od/  
 1H  
 300K

8.039  
 7.871  
 7.844  
 7.831  
 7.811  
 7.805  
 7.759  
 7.740  
 7.670  
 7.649  
 7.568  
 7.550  
 7.532  
 7.390  
 7.372  
 7.353  
 7.115

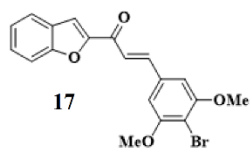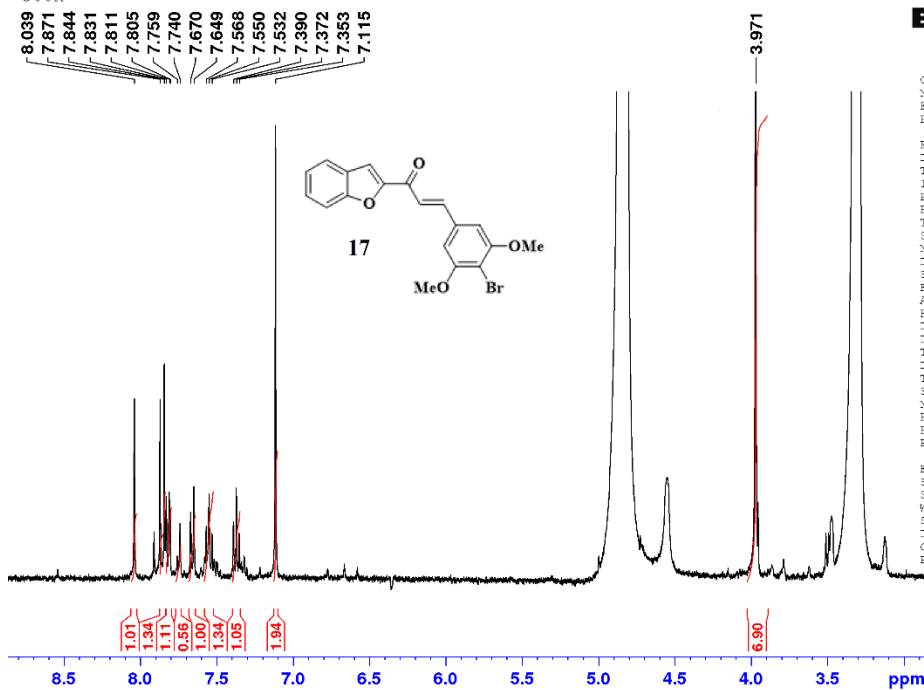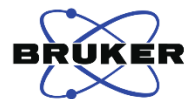

Current Data Parameters  
 NAME Nov25-20  
 EXPNO 3  
 PROCNO 1

F2 - Acquisition Parameters  
 Date\_ 20201125  
 Time\_ 13.11 h  
 INSTRUM AVNec\_400  
 PROBRD Z8247\_0040 (2H  
 F2PRG2020  
 TD 32768  
 SOLVENT MeOD  
 NS 128  
 DS 0  
 SWH 7812.500 Hz  
 FIDRES 0.476837 Hz  
 AQ 2.0971820 sec  
 RG 101  
 DM 64.000 usec  
 DE 14.30 usec  
 TE 300.2 K  
 D1 1.50000000 sec  
 TDO 1  
 SFO1 399.9301994 MHz  
 NUC1 1H  
 P0 3.32 usec  
 P1 9.95 usec  
 PLW1 6.00000000 W

F2 - Processing parameters  
 SI 65536  
 SF 399.9300118 MHz  
 RF 0  
 NDN 3M  
 SSB 0  
 LB 0.30 Hz  
 GB 0  
 PC 1.00

Irfan / Dr.Khalid / GIA-II-193 / DMSO  
BB

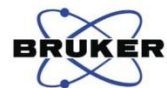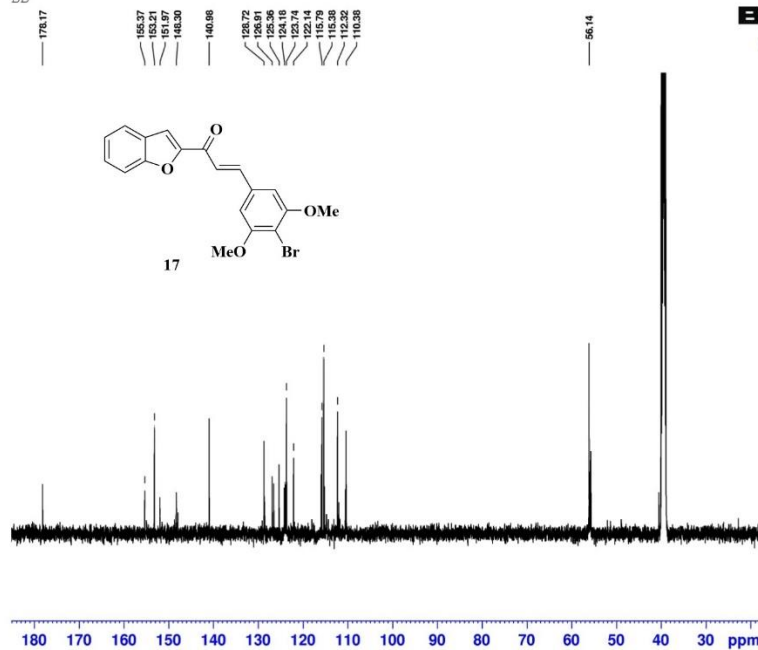

Current Data Parameters  
NAME GIA-II-193a  
EXPNO 4  
PROCNO 1

F2 - Acquisition Parameters  
Date\_ 20220724  
Time 5.25 h  
INSTRUM Avance Neo 500  
PROBHD Z8107\_0198 (9H)  
PULPROG zgpg  
TD 32768  
SOLVENT DMSO  
NS 20480  
DS 8  
SWH 30120.482 Hz  
FIDRES 1.838408 Hz  
AQ 0.5439488 sec  
RG 101  
DW 16.600 usec  
DE 6.50 usec  
TE 298.0 K  
D1 2.00000000 sec  
D11 0.03000000 sec  
TDO 20  
SFO1 125.8225465 MHz  
NUC1 13C  
P1 16.00 usec  
PLM1 145.00000000 W  
SFO2 500.3320013 MHz  
NUC2 1H  
CPDPRG2 waltz65  
PCPD2 80.00 usec  
PLM2 10.00000000 W  
PLM12 0.14854001 W  
PLM13 0.07471200 W

F2 - Processing parameters  
SI 16384  
SF 125.8081403 MHz  
WDW EM  
SSB 0  
LB 1.00 Hz  
GB 0  
PC 1.40

Irfan Ali/Dr,Khalid/GIA-II-193a/Cd3od/  
<sup>1</sup>H  
 300K

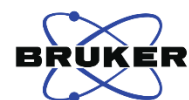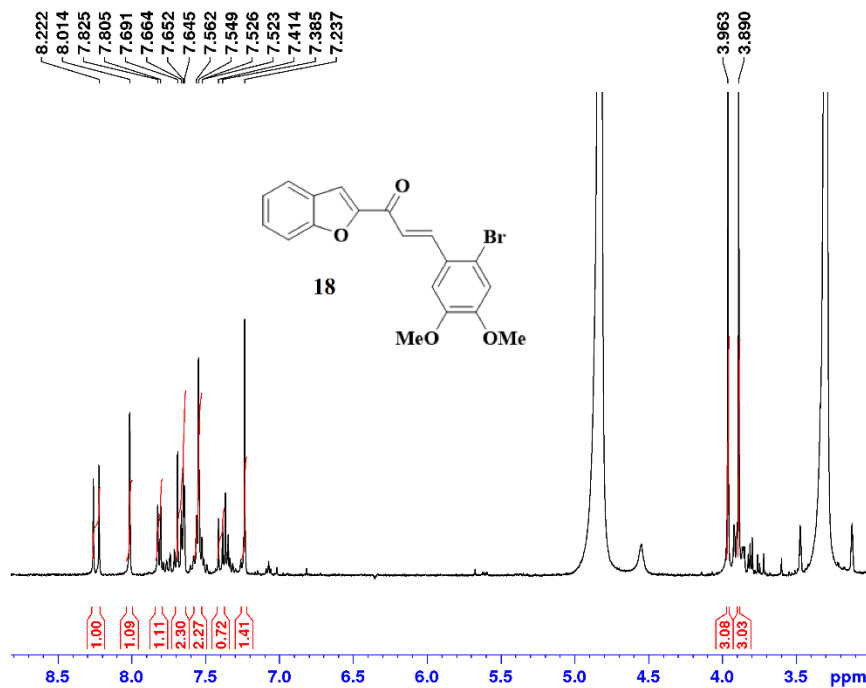

Current Data Parameters  
 NAME Nov25-20  
 EXPNO 5  
 PROCNO 1

F2 - Acquisition Parameters  
 Date\_ 20201125  
 Time 14.48 h  
 INSTRUM AVNec\_400  
 PROBRD 28247\_C04C (2H)  
 FULPROG zg30  
 TD 32768  
 SOLVENT MeOD  
 NS 128  
 DS 0  
 SWH 7812.500 Hz  
 FIDRES 0.476837 Hz  
 AQ 2.0971520 sec  
 RG 101  
 DM 64.000 usec  
 DE 14.30 usec  
 TE 300.3 K  
 D1 1.30000000 sec  
 TDO 1  
 SFO1 399.9331894 MHz  
 NUC1 <sup>1</sup>H  
 P0 3.32 usec  
 F1 9.85 usec  
 PLW1 6.00000000 W

F2 - Processing parameters  
 SI 65536  
 SF 399.9300116 MHz  
 WDW EM  
 SSB 0  
 LB 0.30 Hz  
 GB 0  
 PC 1.00

Irfan Ali/Dr,Khalid/GIA-II-149a/Dmso/  
1H

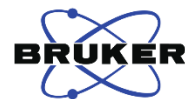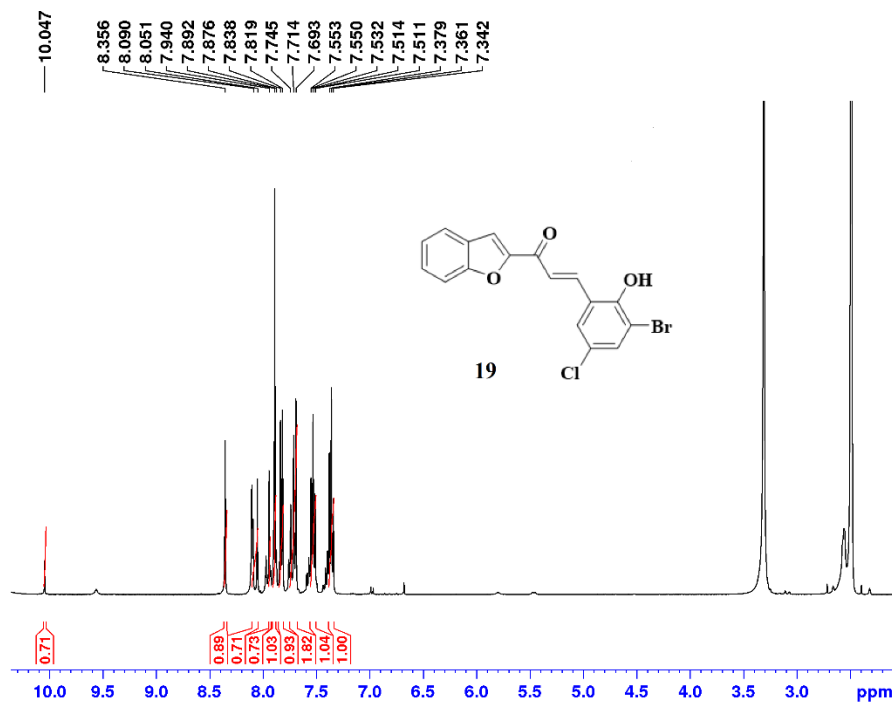

Current Data Parameters  
NAME Oct08-21  
EXPNO 5  
PROCNO 1

F2 - Acquisition Parameters  
Date\_ 20211008  
Time 12.18 h  
INSTRUM AVNec\_400  
PROBHD Z824T\_0040 (PH  
PULPROG zg30  
TD 32768  
SOLVENT DMSO  
NS 64  
DS C  
SWH 7812.500 Hz  
FIDRES 0.476887 Hz  
AQ 2.0971520 sec  
RG 101  
DW 64.000 usec  
DE 14.30 usec  
TE 299.0 K  
D1 1.50000000 sec  
TD0 1  
SFO1 399.9301994 MHz  
NUC1 1H  
P0 3.32 usec  
P1 9.95 usec  
PLW1 6.00000000 W

F2 - Processing parameters  
SI 32768  
SF 399.9300070 MHz  
WDW EM  
SSB 0  
LB 0.30 Hz  
GB C  
PC 1.00

Irfan / Dr.Khalid / GIA-II-159a / DMSO  
BB

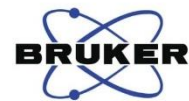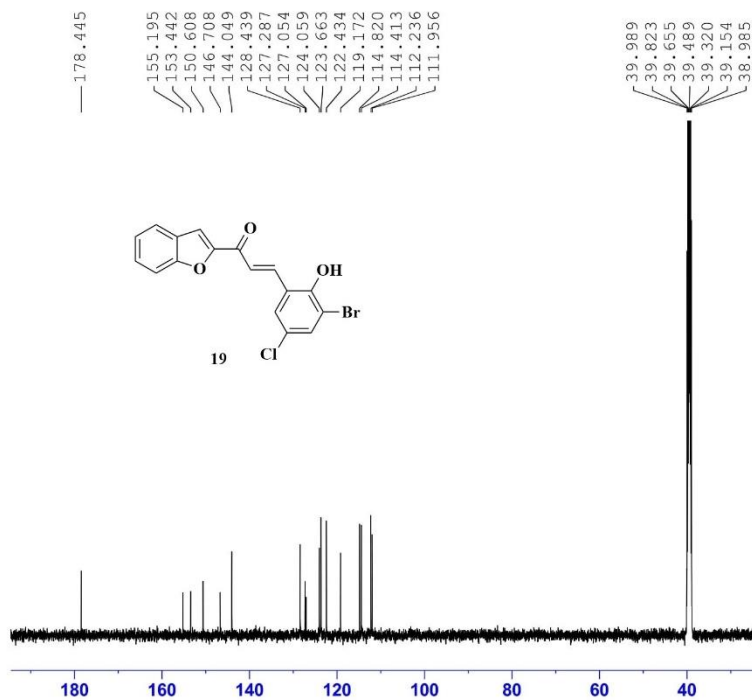

Current Data Parameters  
NAME GIA-II-159a  
EXPNO 3  
PROCNO 1

F2 - Acquisition Parameters  
Date\_ 20220727  
Time 1.50 h  
INSTRUM Avance Neo 500  
PROBHD 28107\_0198 (PH  
PULPROG zgpg  
TD 32768  
SOLVENT DMSO  
NS 20480  
DS 8  
SWH 30120.482 Hz  
FIDRES 1.838408 Hz  
AQ 0.5439488 sec  
RG 101  
DM 16.600 usec  
DE 6.50 usec  
TE 298.0 K  
D1 2.00000000 sec  
D11 0.03000000 sec  
TDO 20  
SFO1 125.8225465 MHz  
NUC1 13C  
P1 16.00 usec  
PLW1 145.00000000 W  
SFO2 500.3320013 MHz  
NUC2 1H  
CPDPRG2 waltz65  
PCPD2 80.00 usec  
PLW2 10.00000000 W  
PLW12 0.14854001 W  
PLW13 0.07471200 W

F2 - Processing parameters  
SI 16384  
SF 125.8081387 MHz  
WDW EM  
SSB 0  
LB 1.00 Hz  
GB 0  
PC 1.40



Irfan/Dr,Khalid/GIA-II-6d/Cdcl3/  
<sup>1</sup>H  
 300K

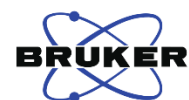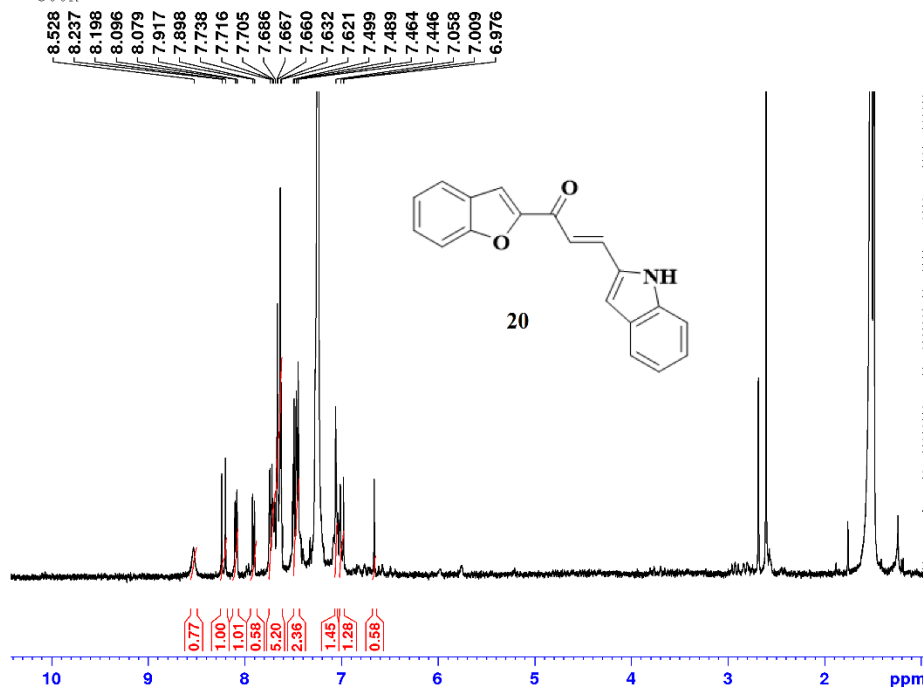

Current Data Parameters  
 NAME Nov02-20  
 EXPNO 29  
 PROCNO 1

F2 - Acquisition Parameters  
 Date\_ 20201102  
 Time 16.29 a  
 INSTRUM AVNec\_400  
 PROBHD 28247\_0040 (PH  
 PULPROG zg30  
 ID 32768  
 SOLVENT CDCl3  
 NS 128  
 DS 0  
 SWH 7612.500 Hz  
 FIDALS 0.476837 Hz  
 AQ 2.0971520 sec  
 RG 101  
 DW 64.000 usec  
 DE 14.30 usec  
 IE 300.0 K  
 DI 2.0000000 sec  
 IDC 1  
 SFO1 399.9331994 MHz  
 NUCL <sup>1</sup>H  
 PC 3.32 usec  
 P1 9.95 usec  
 PLW1 6.00000000 W

F2 - Processing parameters  
 SI 65536  
 SF 399.9300176 MHz  
 WDW EM  
 SSB 0  
 LB 0.30 Hz  
 GB 0  
 PC 1.00

Irfan/Dr,Khalid/GIA-II-151a/Cdc13/  
 1H  
 300K

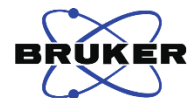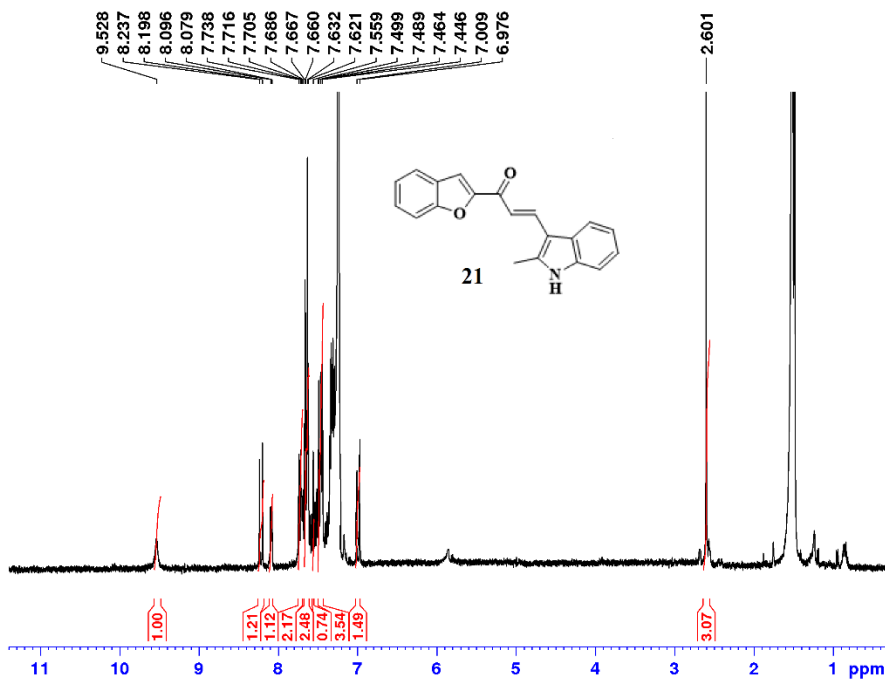

Current Data Parameters  
 NAME Nov2-20  
 EXPNO 29  
 PROCNO 1

F2 - Acquisition Parameters  
 Date\_ 20201102  
 Time 16.28 h  
 INSTRUM AVNeo-600  
 PROBE 38227\_0040 (1H)  
 PULPROG zg30  
 TD 32768  
 SOLVENT CDCl3  
 NS 128  
 DS 0  
 SWH 7812.500 Hz  
 FIDRES 0.476837 Hz  
 AQ 2.0971520 sec  
 RG 101  
 EW 64.000 usec  
 DE 14.30 usec  
 TE 300.0 K  
 D1 2.00000000 sec  
 ID0 1  
 SF01 399.9331994 MHz  
 NUC1 1H  
 P0 3.32 usec  
 P1 9.95 usec  
 PLW1 6.00000000 W

F2 - Processing parameters  
 SI 65536  
 SF 399.9300176 MHz  
 WDW EM  
 SSB 0  
 LB 0.30 Hz  
 GB 0  
 PC 1.00

IRFAN / DR.KHALID / GIA-II-149 / DMSO  
BB

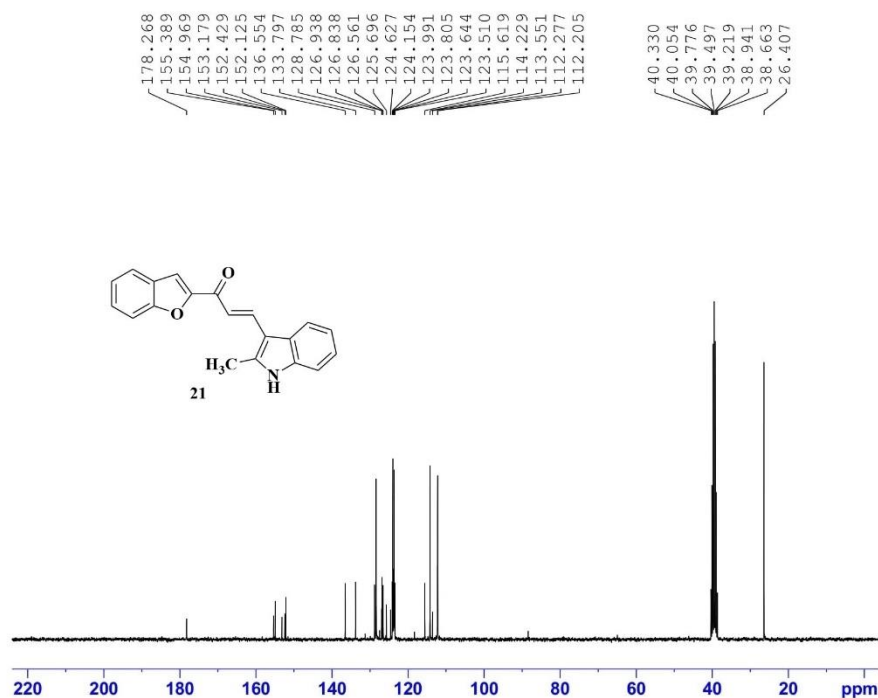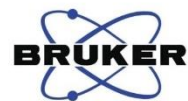

Current Data Parameters  
NAME GIA-II-149a  
EXPNO 3  
PROCNO 1

F2 - Acquisition Parameters  
Date\_ 20220727  
Time 1.00 h  
INSTRUM Avance Neo 300  
PROBHD Z8284\_0948 (PH  
PULPROG zgpg  
TD 32768  
SOLVENT DMSO  
NS 16384  
DS 8  
SWH 17857.143 Hz  
FIDRES 1.089913 Hz  
AQ 0.9175040 sec  
RG 12.5649  
DW 28.000 usec  
DE 12.00 usec  
TE 300.0 K  
D1 2.00000000 sec  
D11 0.03000000 sec  
TD0 16  
SFO1 75.4764278 MHz  
NUC1 13C  
P1 10.00 usec  
PLW1 53.07400131 W  
SFO2 300.1312005 MHz  
NUC2 1H  
CPDPRG[2] waltz65  
PCPD2 90.00 usec  
PLW2 8.72920036 W  
PLW12 0.24247999 W  
PLW13 0.12196000 W

F2 - Processing parameters  
SI 16384  
SF 75.4677848 MHz  
WDW EM  
SSB 0  
LB 1.00 Hz  
GB 0  
PC 1.00

Irfan/Dr,Khalid/GIA-II-177a/Dmsd/  
 1H  
 300K

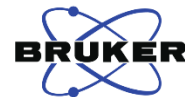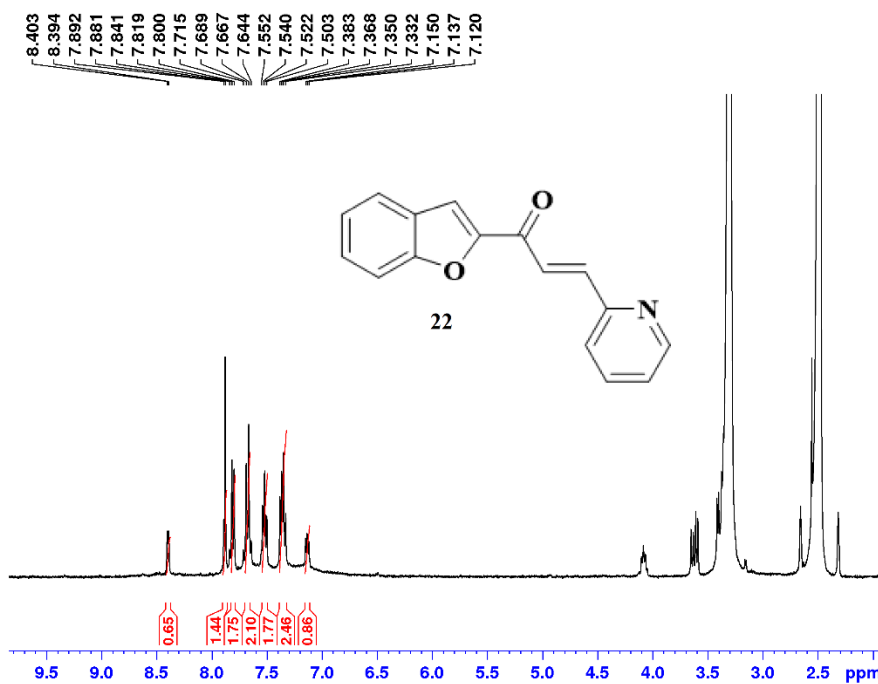

Current Data Parameters  
 NAME Nov11-20  
 EXPNO 1  
 PROCNO 1

F2 - Acquisition Parameters  
 Date\_ 20201111  
 Time 11.52 h  
 INSTRUM AVNeo\_400  
 PROBEID Z8247\_0040 (PH  
 PULPROG zgpg30  
 ID 32768  
 SOLVENT DMSO  
 NS 128  
 DS 0  
 SWH 7612.500 Hz  
 FIDRES 0.476837 Hz  
 AQ 2.0971320 sec  
 RG 101  
 DW 64.000 usec  
 DE 14.30 usec  
 TE 300.0 K  
 D1 2.0000000 sec  
 IDC 1  
 SFOL 399.9331994 MHz  
 NUCL 1H  
 PC 3.32 usec  
 P1 9.95 usec  
 PLWL 6.00000000 W

F2 - Processing parameters  
 SI 65536  
 SF 399.930071 MHz  
 WDW EM  
 SSB 0  
 LB 0.30 Hz  
 GB 0  
 PC 1.00

Irfan/Dr,Khalid/GIA-II-135a/DMSO/  
1H

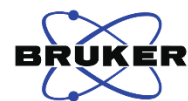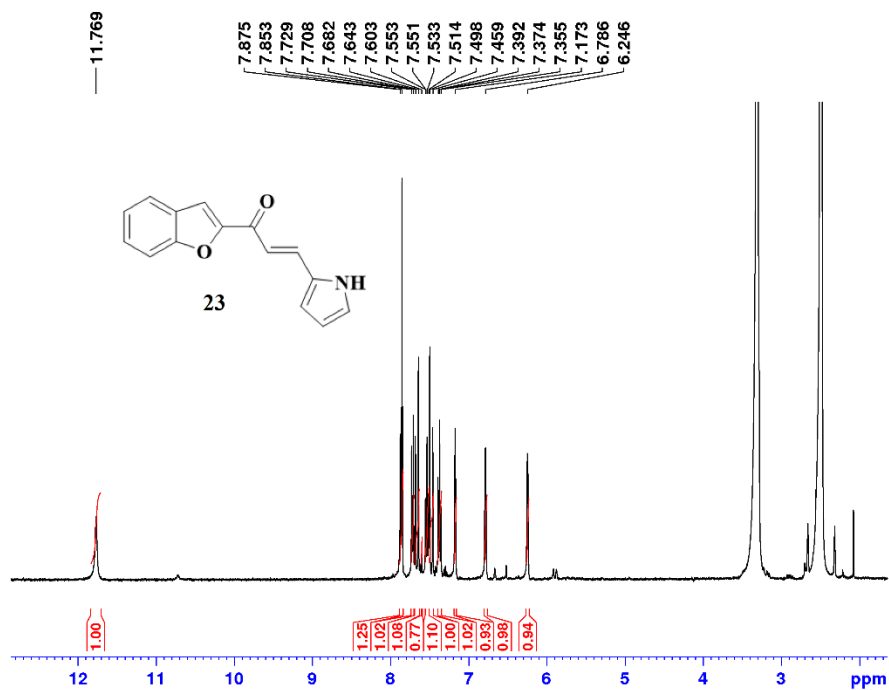

Current Data Parameters  
NAME Oct06-21  
EXPNO 3  
PROCNO 1

F2 - Acquisition Parameters  
Date\_ 20211106  
Time 12.35 h  
INSTRUM AVNec\_40C  
PROBHD Z8247\_004C (2H  
PULPROG zgpg30  
TD 32768  
SOLVENT DMSO  
NS 64  
DS 0  
SWH 7812.500 Hz  
FIDRES 0.476837 Hz  
AQ 2.0971820 sec  
RG 101  
DM 64.000 usec  
DE 14.30 usec  
TE 299.0 K  
D1 2.0000000 sec  
TD0 1  
SFO1 399.9331994 MHz  
NUC1 1H  
P0 3.32 usec  
P1 9.95 usec  
PLW1 6.00000000 W

F2 - Processing parameters  
SI 32768  
SF 399.9300073 MHz  
WDW EM  
SSB 0  
LB 0.30 Hz  
GB 0  
PC 1.00

Irfan Ali/Dr,Khalid/GIA-II-6e/  
1H  
300K

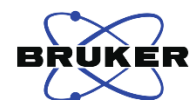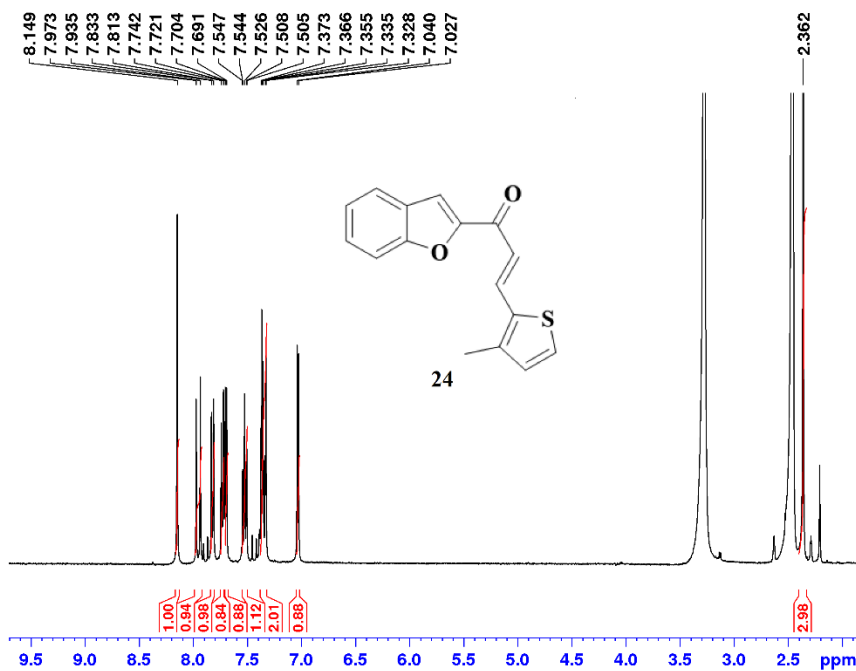

Current Data Parameters  
NAME Nov03-20  
EXPNO 10  
PROCNO 1

F2 - Acquisition Parameters  
Date\_ 2020103  
Time 12.37 h  
INSTRUM AVXec\_400  
PROBHD Z8247\_004C (2H)  
PULPROG zg30  
TD 32768  
SOLVENT DMSO  
NS 64  
DS 0  
SWH 7812.500 Hz  
FIDRES 0.476837 Hz  
AQ 2.0971520 sec  
RG 101  
DM 64.000 usec  
DE 14.30 usec  
TE 300.3 K  
D1 2.00000000 sec  
TD0 1  
SFO1 399.9331994 MHz  
NUC1 13  
P0 3.32 usec  
F1 9.95 usec  
PLW1 6.00000000 W

F2 - Processing parameters  
SI 65536  
SF 399.9300178 MHz  
WDW EM  
SSE 0  
LB 0.30 Hz  
GB 0  
PC 1.00

Irfan Ali/Dr,Khalid/GIA-II-6f/Dmso/  
 1H  
 300K

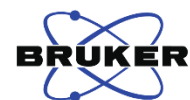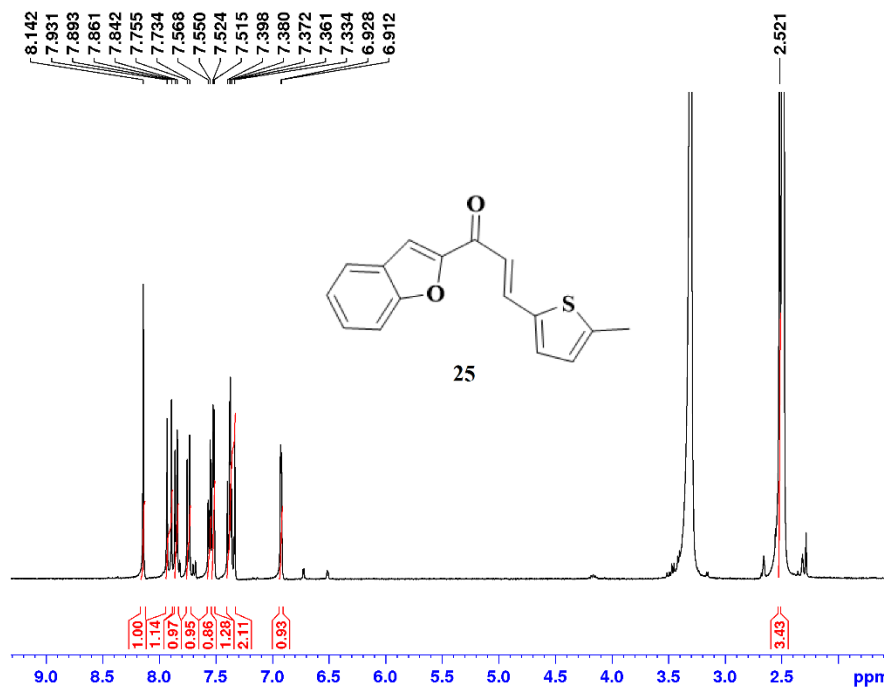

Current Data Parameters  
 NAME Nov04-20  
 EXPNO 11  
 PROCNO 1

F2 - Acquisition Parameters  
 Date\_ 20201104  
 Time 16.03 h  
 INSTRUM AVNec\_400  
 PROBED 26247\_0040 (PH)  
 PULPROG zg30  
 TD 32768  
 SOLVENT DMSO  
 NS 64  
 DS 0  
 SWE 7812.300 Hz  
 FIDRES 0.476837 Hz  
 AQ 2.0971520 sec  
 RG 101  
 DW 64.000 usec  
 DE 14.30 usec  
 TE 300.0 K  
 D0 1.30000000 sec  
 TD0 1  
 SF01 399.9331994 MHz  
 NU01 1H  
 F0 3.32 usec  
 P0 9.85 usec  
 PLW1 6.00000000 W

F2 - Processing parameters  
 SI 65536  
 SF 399.930069 MHz  
 WDW EM  
 SSB 0  
 LB 0.30 Hz  
 GB 0  
 PC 1.00



```

P2 - Acquisition Parameters
Date_      20201109
Time       11:48 h
INSTRUM    AVN60_400
PROBHD     28247_C04G_C2
PULPROG    zgpg30
TD         32768
SOLVENT     DMSO
NS         64
DS         782.500 Hz
SWH         0.1837 Hz
AQ         2.0971200 sec
RG          101
DE         64.000 usec
JE         14.30 usec
RE         300.3 K
CL         1.50000000 sec
TD0         1
SFOL       399.9331994 MHz
NJOCL      1H
PC         3.32 usec
PI         9.95 usec
PLW        6.00000000 W

```

```
F2 - Processing parameters
SI              65536
SF              399.9300068 MHz
WDW             EM
SSB             0
LB              0.30 Hz
GB              0
PC              0.00
```

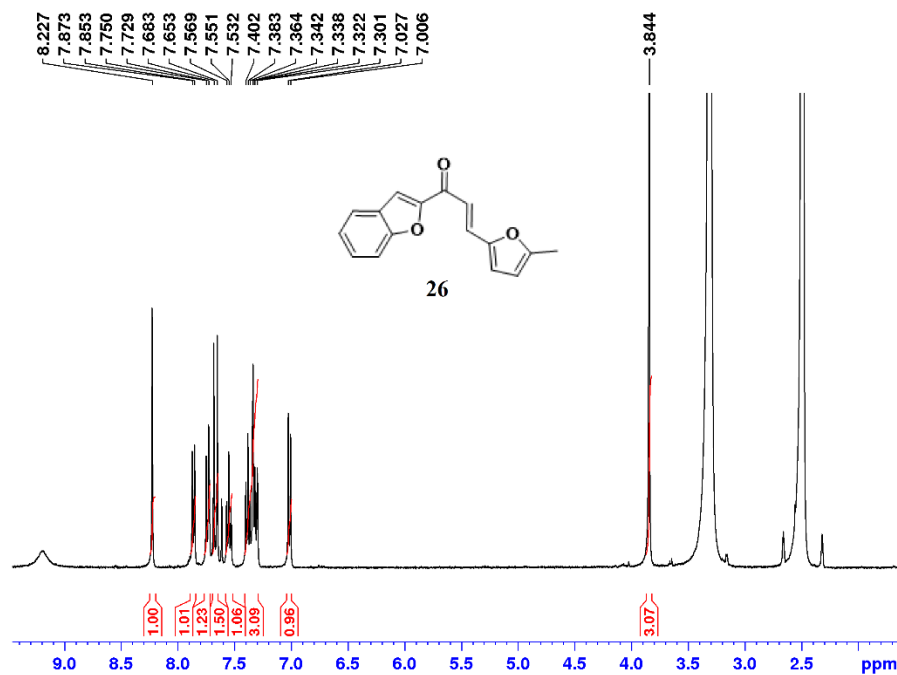



IRFAN / DR.KHALID / GIA-II-151a / DMSO  
BB

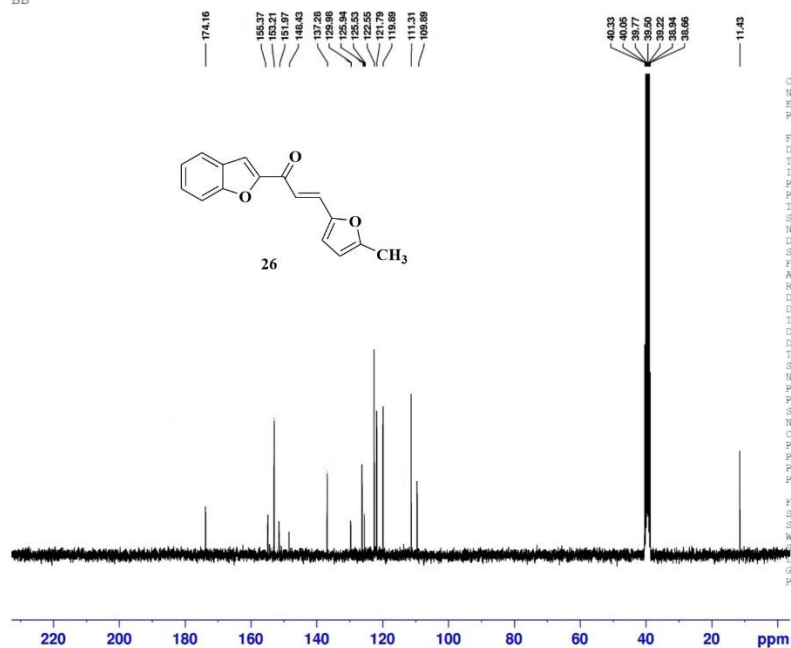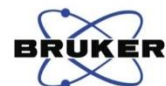

Current Data Parameters  
NAME GIA-II-151  
EXPNO 2  
PROCNO 1

F2 - Acquisition Parameters  
Date\_ 20220802  
Time 8.30 h  
INSTRUM Avance Neo 300  
PROBHD 28284\_0948 (PH  
PULPROG zgpg  
TD 32768  
SOLVENT DMSO  
NS 24576  
DS 8  
SWH 17857.143 Hz  
FIDRES 1.089913 Hz  
AQ 0.9175040 sec  
RG 12.5649  
DW 28.000 usec  
DE 12.00 usec  
TE 300.0 K  
D1 2.00000000 sec  
D11 0.03000000 sec  
TD0 24  
SFO1 75.4764278 MHz  
NUC1 13C  
P1 10.00 usec  
PLW1 53.07400131 W  
SFO2 300.1312005 MHz  
NUC2 1H  
CPDPRG2 waltz165  
PCPD2 90.00 usec  
PLW2 8.72920036 W  
PLW12 0.24247999 W  
PLW13 0.12196000 W

F2 - Processing parameters  
SI 16384  
SF 75.4677869 MHz  
WDW EM  
SS 0  
GB 1.00 Hz  
GB 0  
PC 1.00

Irfan Ali/Dr,Khalid/GIA-II-6J(125a)/Dmsd/  
<sup>1</sup>H  
 300K

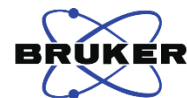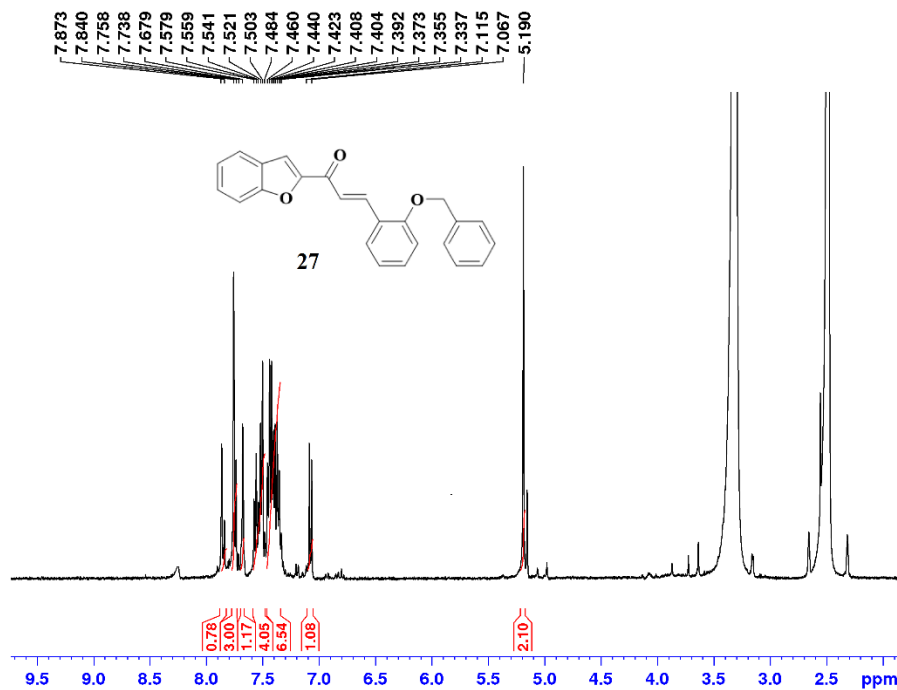

Current Data Parameters  
 NAME Nov04-20  
 EXPNO 9  
 PROCNO 1

F2 - Acquisition Parameters  
 Date\_ 20201104  
 Time 15.41 h  
 INSTRUM AVNec\_400  
 PROBHD 28247\_3040 (PH  
 PULPROG zg30  
 TD 32768  
 SOLVENT DMSO  
 NS 64  
 DS C  
 SWH 7812.500 Hz  
 FIDRES 0.476837 Hz  
 AQ 2.0971520 sec  
 RG 101  
 DW 64.000 usec  
 DE 14.30 usec  
 TE 300.0 K  
 D1 1.50000000 sec  
 TD0 1  
 SFO1 399.9331994 MHz  
 NUC01 <sup>1</sup>H  
 P0 3.32 usec  
 PL 9.95 usec  
 PLW1 6.00000000 W

F2 - Processing parameters  
 SI 65536  
 SF 399.9300069 MHz  
 WDW EM  
 SSB 0  
 LB 0.30 Hz  
 GB C  
 PC 1.00

Irfan Ali/Dr,Khalid/GIA-II-23a/DMSO/  
<sup>1</sup>H  
 300K

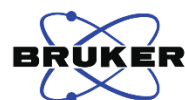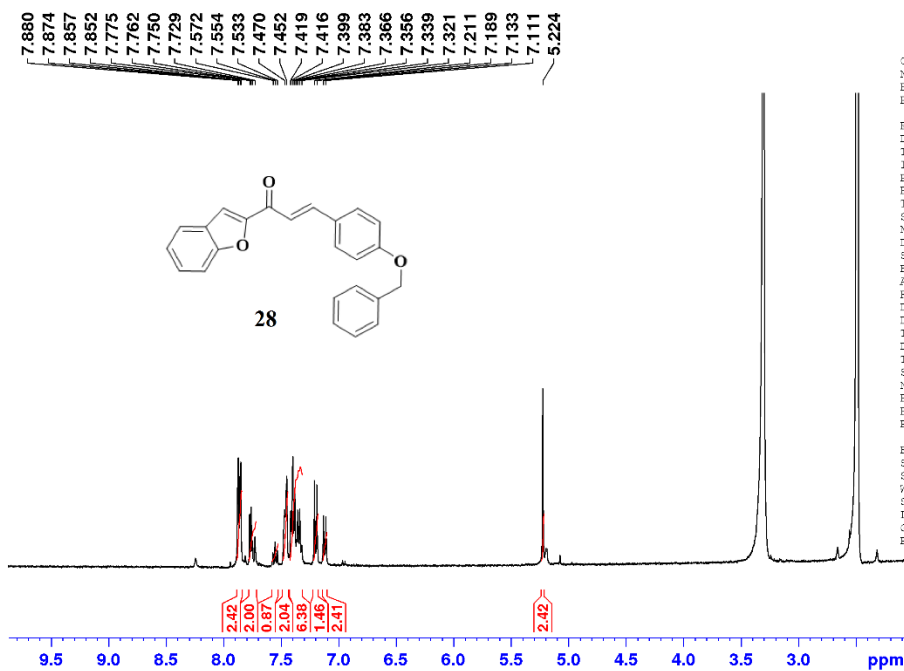

Current Data Parameters  
 NAME Nov04-20  
 EXPNO 10  
 PROCNO 1

F2 - Acquisition Parameters  
 Date\_ 20201104  
 Time 18.51 h  
 INSTRUM AVNeo\_400  
 PROBHD 28247\_0040 (PH)  
 PULPROG zgpg30  
 TD 32768  
 SOLVENT DMSO  
 NS 64  
 DS 0  
 SWH 7812.500 Hz  
 FIDRES 0.476837 Hz  
 AQ 2.0971320 sec  
 RG 101  
 DW 64.000 usec  
 DE 14.30 usec  
 TE 300.0 K  
 D1 1.50000000 sec  
 IDC 1  
 SFOL 399.9331994 MHz  
 NUC1 1H  
 PC 3.32 usec  
 P1 9.95 usec  
 FLM 6.00000000 W

F2 - Processing parameters  
 SI 65536  
 SF 399.930069 MHz  
 WDW EM  
 SSB 0  
 LB 0.30 Hz  
 GB 0  
 PC 1.00

Irfan Ali/Dr,Khalid/GIA-II-6J(125a)/DMSO/  
<sup>1</sup>H  
 300K

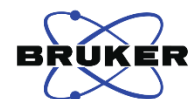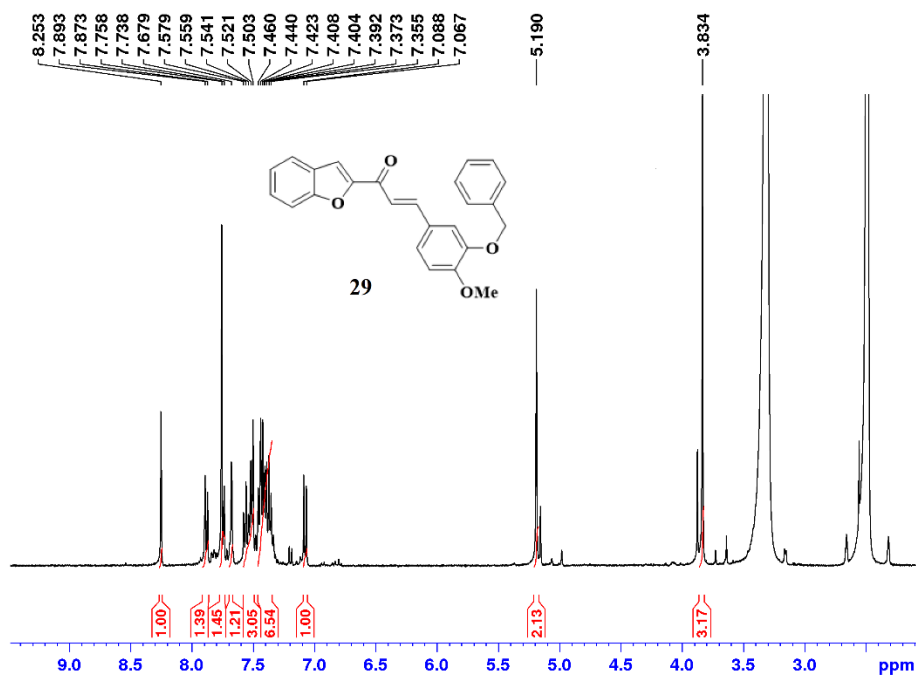

Current Data Parameters  
 NAME Nov04-20  
 EXPNO 9  
 PROCNO 1

F2 - Acquisition Parameters  
 Date\_ 20201104  
 Time 15:41 h  
 INSTRUM AVNec\_400  
 PROBED 28247\_0040 (PH  
 PULPROG zg30  
 TD 32768  
 SOLVENT DMSO  
 NS 64  
 DS 4  
 SWE 7812.500 Hz  
 FIDRES 0.476837 Hz  
 AQ 2.0971920 sec  
 RG 655  
 DW 64.000 usec  
 DE 14.30 usec  
 TE 300.0 K  
 D1 1.50000000 sec  
 CPO 1  
 CF01 399.9331994 MHz  
 NUC1 <sup>1</sup>H  
 P0 3.32 usec  
 PL 9.93 usec  
 PLW1 6.00000000 W

F2 - Processing parameters  
 SI 65536  
 SF 399.9330069 MHz  
 WDW EM  
 SSB 0  
 LB 0.30 Hz  
 GB 0  
 PC 1.00

Irfan/Dr,Khalid/GIA-II-127c/DMSO/  
1H  
300K

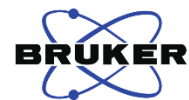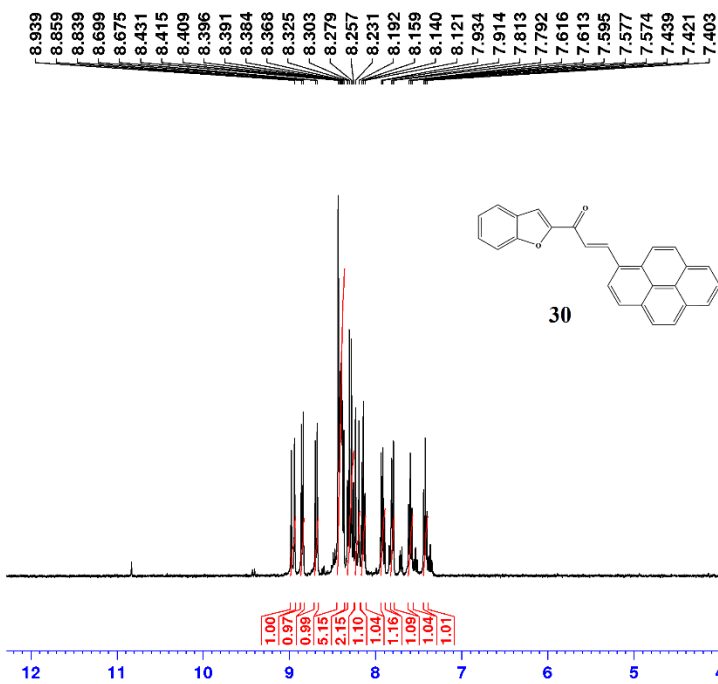

Current Data Parameters  
NAME Nov20-20  
EXPNO 3  
PROCNO 1

F2 - Acquisition Parameters  
Date\_ 20201109  
Time 11:56 h  
INSTRUM AVNeo-400  
PROBHD 28247\_0040 (PH  
PULPROG zg30  
TD 32768  
SOLVENT DMSO  
NS 64  
DS 0  
SWH 7812.500 Hz  
FIDRES 0.476837 Hz  
AQ 2.0971520 sec  
RG 101  
DW 64.000 usec  
DE 14.30 usec  
TE 300.0 K  
D1 1.50000000 sec  
TDC 1  
SFO1 399.933199 MHz  
NUC1 1H  
PC 3.32 usec  
PI 9.95 usec  
PL1 6.00000000 W

F2 - Processing parameters  
SI 65536  
SF 399.9300068 MHz  
WDW EM  
SSB 0  
LB 0.30 Hz  
GB 0  
PC 1.00

Irfan / Dr.Khalid / GIA-II-127 / DMSO  
BB

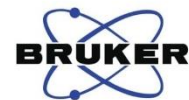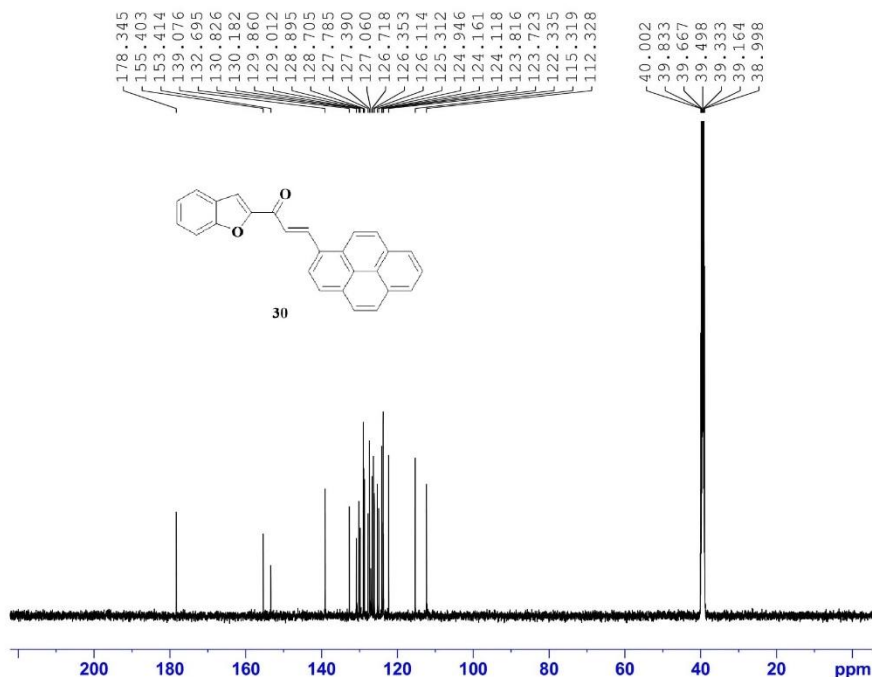

Current Data Parameters  
NAME GIA-II-127a  
EXPNO 2  
PROCNO 1

F2 - Acquisition Parameters  
Date\_ 20220723  
Time\_ 1.33 h  
INSTRUM Avance Neo 500  
PROBHD Z8107\_0198 (PH  
PULPROG zgpgg  
TD 32768  
SOLVENT DMSO  
NS 18432  
DS 8  
SWH 30120.482 Hz  
FIDRES 1.838408 Hz  
AQ 0.5439488 sec  
RG 101  
DW 16.600 usec  
DE 6.50 usec  
TE 298.0 K  
D1 2.00000000 sec  
D11 0.03000000 sec  
TD0 18  
SFO1 125.8225465 MHz  
NUC1 13C  
P1 16.00 usec  
PLW1 145.00000000 W  
SFO2 500.3320013 MHz  
NUC2 1H  
CPDPRG2 waltz65  
PCPD2 80.00 usec  
PLW2 10.00000000 W  
PLW3 0.14854001 W  
PLW13 0.07471200 W

F2 - Processing parameters  
SI 16384  
SF 125.8061403 MHz  
WDW EM  
SSB 0  
LB 1.00 Hz  
GB 0  
PC 1.40

Irfan/Dr, Khalid/GIA-II-173a/DMSO/  
<sup>1</sup>H  
 300K

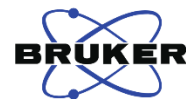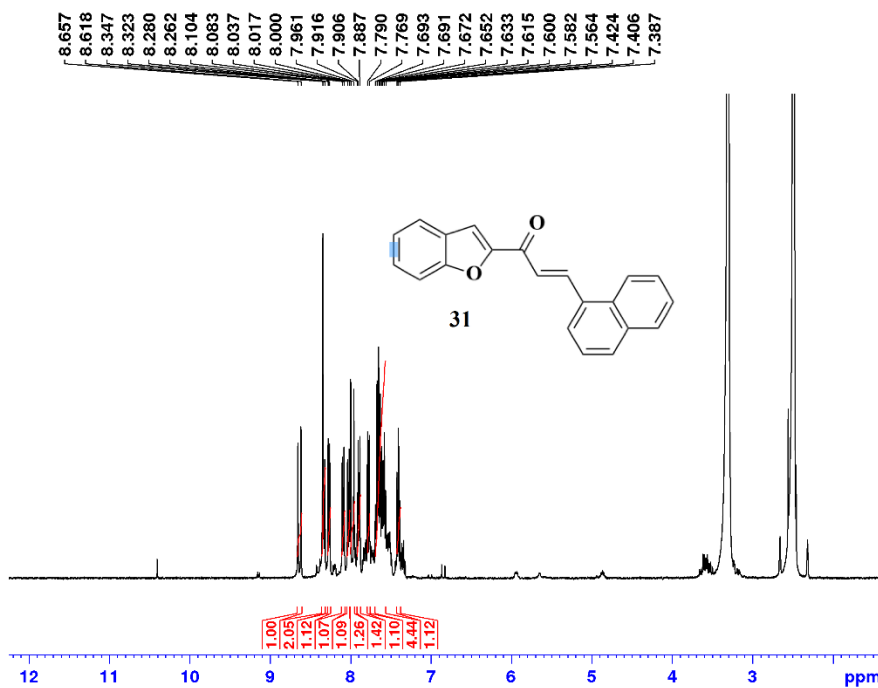

Current Data Parameters  
 NAME Nov11-20  
 EXPNO 2  
 F2ACQNO 1

F2 - Acquisition Parameters  
 Date\_ 20201111  
 Time 12.37 h  
 INSTRUM AVNec\_400  
 PROSED 28247\_0040 (PH  
 PULPROG zgpg30  
 TD 32768  
 SOLVENT DMSO  
 NS 64  
 DS 4  
 SWE 7812.500 Hz  
 FIDRES 0.476837 Hz  
 AQ 2.0971520 sec  
 RG 101  
 DW 64.000 usec  
 DE 14.50 usec  
 TE 300.0 K  
 D1 2.00000000 sec  
 TDO 1  
 SFO1 399.9331994 MHz  
 NUC1 1H  
 P0 3.32 usec  
 P1 9.95 usec  
 PLW1 6.00000000 W

F2 - Processing parameters  
 SI 65536  
 SF 399.9330071 MHz  
 WDW EM  
 SSB 0  
 LB 0.30 Hz  
 GB 0  
 PC 1.00

Irfan/Dr,Khalid/GIA-II-183a/DMSO/  
<sup>1</sup>H  
 300K

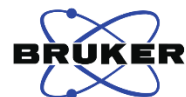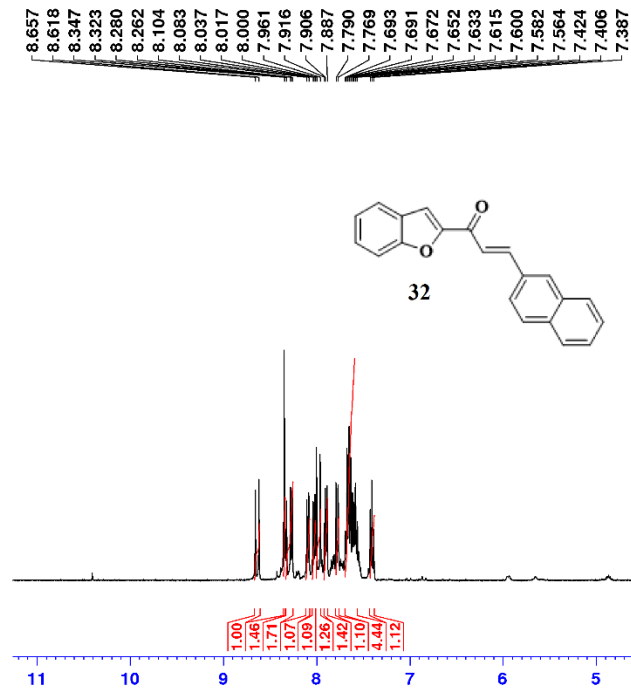

Current Data Parameters  
 NAME Novil-20  
 EXPNO 2  
 PROCNO 1

F2 - Acquisition Parameters  
 Date\_ 20201111  
 Time 12.37 h  
 INSTRUM AVNec\_400  
 PROBED 28247\_0040 (PH  
 PULPROG zg30  
 TD 32768  
 SOLVENT DMSO  
 NS 64  
 DS 4  
 SWE 7812.500 Hz  
 FIDRES 0.476837 Hz  
 AQ 2.0971520 sec  
 RG 101  
 DW 64.000 usec  
 DE 14.30 usec  
 TE 300.0 K  
 DL 2.00000000 sec  
 TDO 1  
 SFO1 399.9331994 MHz  
 NUC1 <sup>1</sup>H  
 P1 3.32 usec  
 PL1 9.95 usec  
 PLW1 6.00000000 W

F2 - Processing parameters  
 SI 65536  
 SF 399.9330071 MHz  
 WDW EM  
 SSB 0  
 LB 0.30 Hz  
 GB 0  
 PC 1.00



Irfan/Dr,Khalid/GIA-II-155a/DMSO/

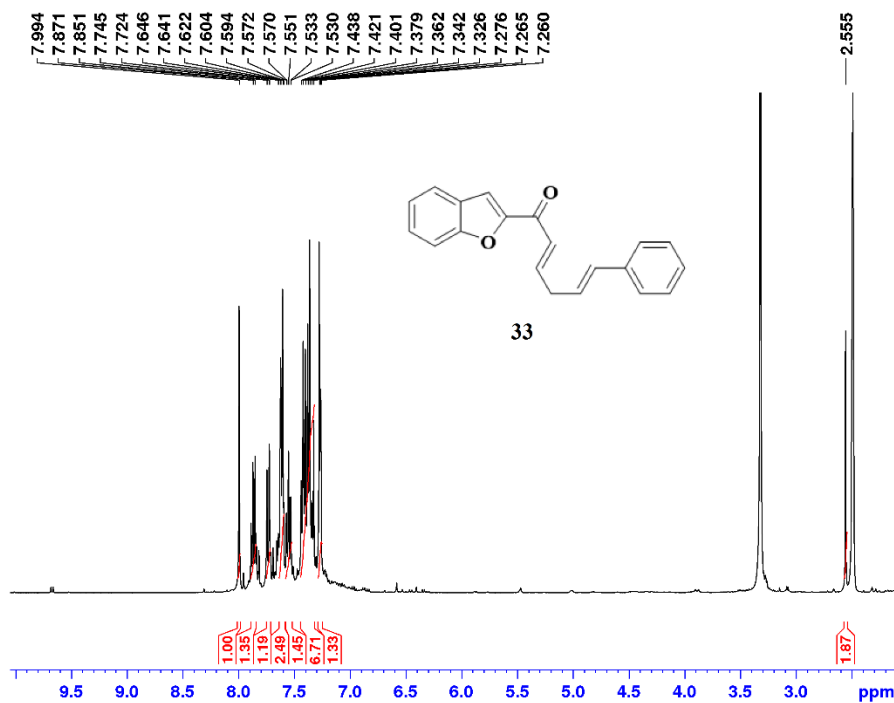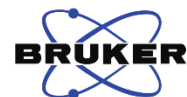

Current Data Parameters  
NAME July26-21  
EXPNO 4  
PROCNO 1

F2 - Acquisition Parameters  
Date\_ 20210726  
Time 10.39 h  
INSTRUM AVNec400  
PROBHD Z8247\_3040 (PH  
PULPROG zg30  
TD 32768  
SOLVENT DMSO  
NS 64  
DS 0  
SWH 7812.500 Hz  
FIDRES 0.476837 Hz  
AQ 2.0971520 sec  
RG 101  
DN 64.000 usec  
DE 24.30 usec  
TE 299.3 K  
D1 2.00000000 sec  
TD0 1  
SFO1 399.9331994 MHz  
NUC1 1H  
P0 3.32 usec  
P1 9.95 usec  
PLW1 6.00000000 W

F2 - Processing parameters  
SI 32768  
SF 399.9330066 MHz  
WDW EM  
SSB 0  
LB 0.30 Hz  
GB 0  
PC 1.00

IRFAN / DR.KHALID / GIA-II-155a / DMSO  
BB

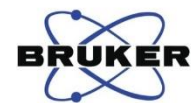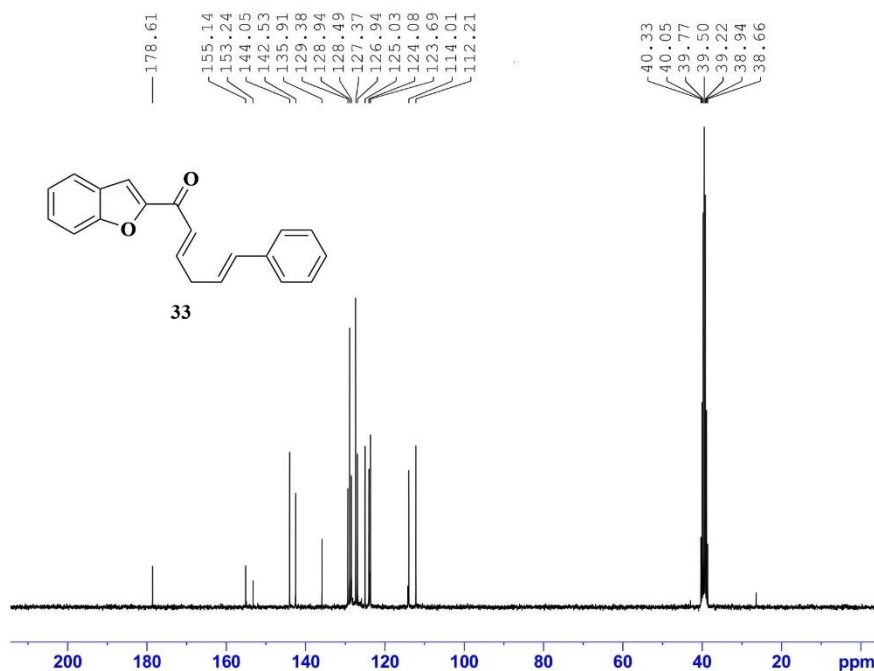

Current Data Parameters  
NAME GIA-II-155  
EXPNO 2  
PROCNO 1

F2 - Acquisition Parameters  
Date\_ 20220731  
Time 5.12 h  
INSTRUM Avance Neo 300  
PROBHD Z8284\_0948 (PH  
PULPROG zgpgg  
TD 32768  
SOLVENT DMSO  
NS 18432  
DS 8  
SWH 17857.143 Hz  
FIDRES 1.089913 Hz  
AQ 0.9175040 sec  
RG 12.5649  
DW 28.000 usec  
DE 12.00 usec  
TE 300.0 K  
D1 2.00000000 sec  
D11 0.03000000 sec  
TD0 18  
SFO1 75.4764278 MHz  
NUC1 13C  
P1 10.00 usec  
PLW1 53.07400131 W  
SFO2 300.1312005 MHz  
NUC2 1H  
CPDPRG[2] waltz65  
PCPD2 90.00 usec  
PLW2 8.72920036 W  
PLW12 0.24247999 W  
PLW13 0.12196000 W

F2 - Processing parameters  
SI 16384  
SF 75.4677869 MHz  
WDW EM  
SSB 0  
LB 1.00 Hz  
GB 0  
PC 1.00
