# Supplementary material
Source: publisher figshare collection journal article supplement (https://future-science-group.figshare.com/articles/dataset/_/22116839)
Supplement: Supplementary file 3 [file 1]

**(Compound 11)**

INDUSTRIAL ANALYTICAL CENTER

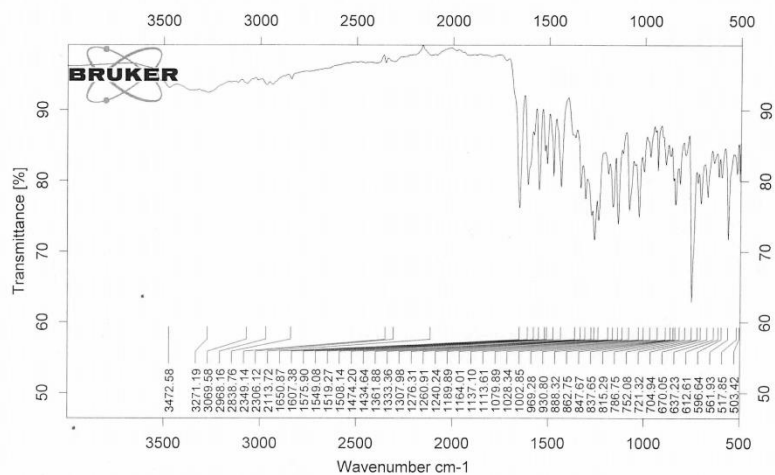

SAMPLE CODE : GIA-I-7g

USER: Administrator

SAMPLE SCANS : 16

SAMPLE NAME: POWDER

DATE : 7/28/2022

TIME: 11:45:04 AM

**(Compound 12)**

INDUSTRIAL ANALYTICAL CENTER

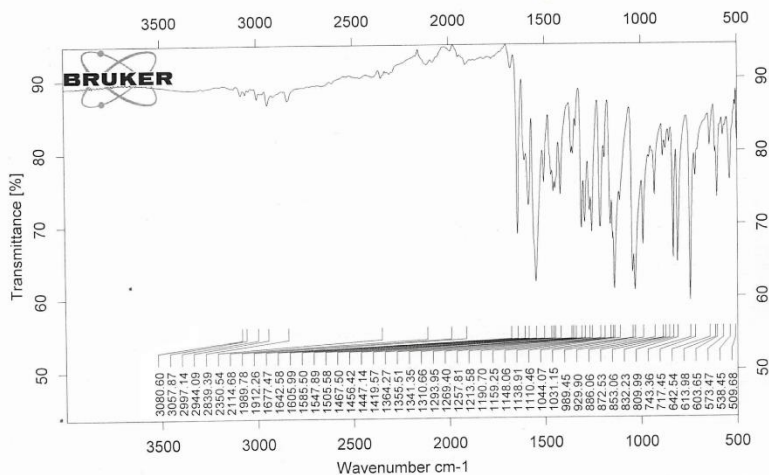

SAMPLE CODE : GIA-I-6n

USER: Administrator

SAMPLE SCANS : 16

SAMPLE NAME: POWDER

DATE : 7/28/2022

TIME: 11:34:17 AM

**(Compound 15)**

INDUSTRIAL ANALYTICAL CENTER

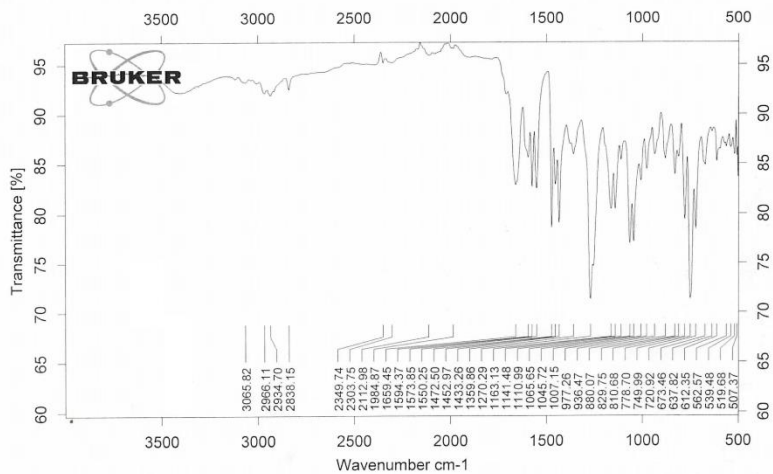

SAMPLE CODE : GIA-I-6P

USER: Administrator

SAMPLE SCANS : 16

SAMPLE NAME: POWDER

DATE : 7/28/2022

TIME: 11:41:04 AM

**(Compound 17)**

INDUSTRIAL ANALYTICAL CENTER

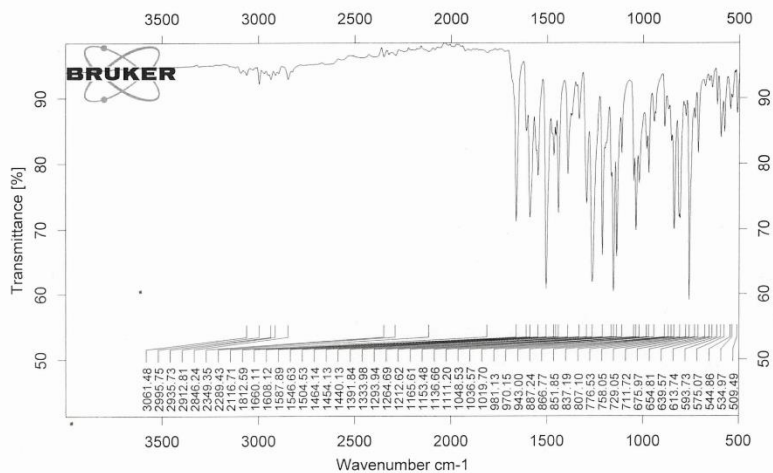

SAMPLE CODE : GIA-I-7t

USER: Administrator

SAMPLE SCANS : 16

SAMPLE NAME: POWDER

DATE : 7/28/2022

TIME: 11:46:42 AM

**(Compound 19)**

INDUSTRIAL ANALYTICAL CENTER

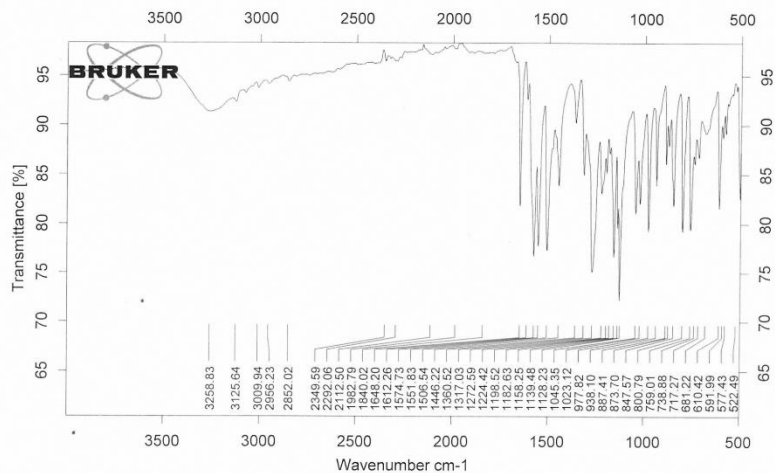

SAMPLE CODE : GIA-I-7a

USER: Administrator

SAMPLE SCANS : 16

SAMPLE NAME: POWDER

DATE : 7/28/2022

TIME: 12:01:29 PM

**(Compound 20)**

INDUSTRIAL ANALYTICAL CENTER

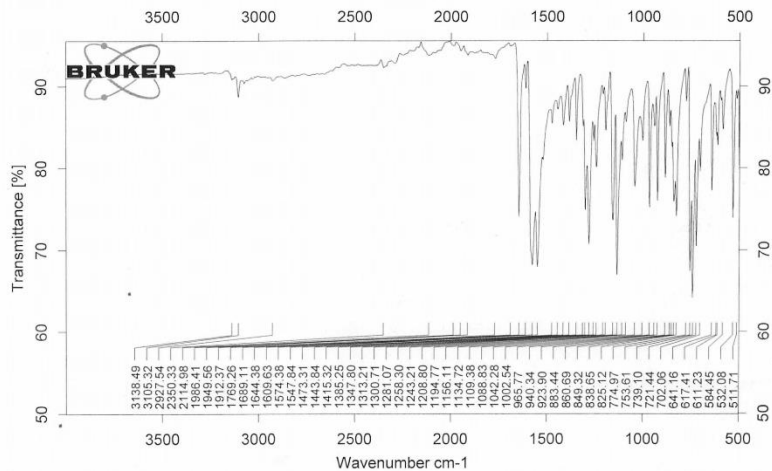

SAMPLE CODE : GIA-I-6e

USER: Administrator

SAMPLE SCANS : 16

SAMPLE NAME: POWDER

DATE : 7/28/2022

TIME: 11:36:02 AM

**(Compound 21)**

INDUSTRIAL ANALYTICAL CENTER

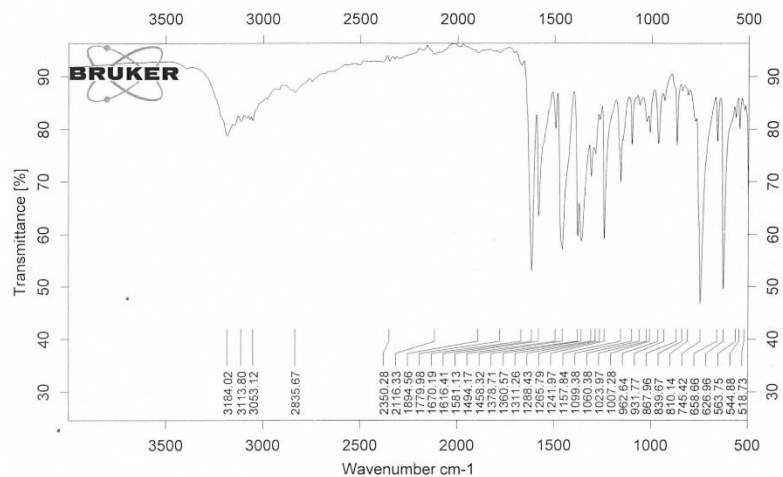

SAMPLE CODE : GIA-I-6W

USER: Administrator

SAMPLE SCANS : 16

SAMPLE NAME: POWDER

DATE : 7/28/2022

TIME: 11:39:32 AM

**(Compound 26)**

INDUSTRIAL ANALYTICAL CENTER

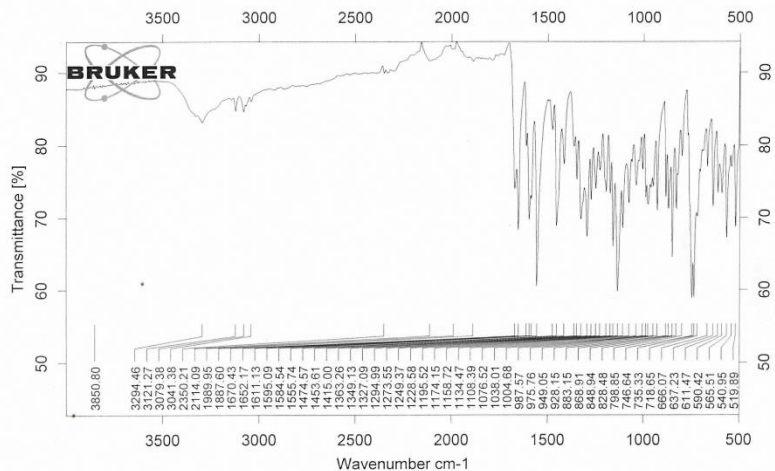

SAMPLE CODE : GIA-II-149a

USER: Administrator

SAMPLE SCANS : 16

SAMPLE NAME: POWDER

DATE : 7/28/2022

TIME: 11:48:21 AM

**(Compound 30)**

INDUSTRIAL ANALYTICAL CENTER

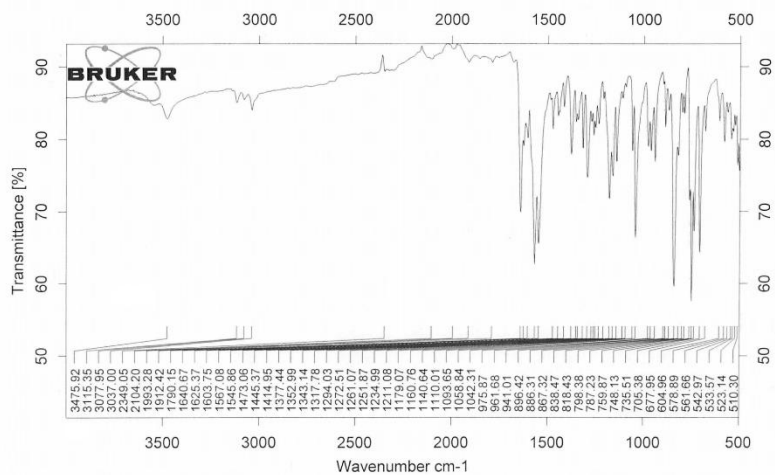

SAMPLE CODE : GIA-I-6K

SAMPLE SCANS : 16

DATE : 7/28/2022

USER: Administrator

SAMPLE NAME: POWDER

TIME: 11:42:39 AM

**(Compound 33)**

INDUSTRIAL ANALYTICAL CENTER

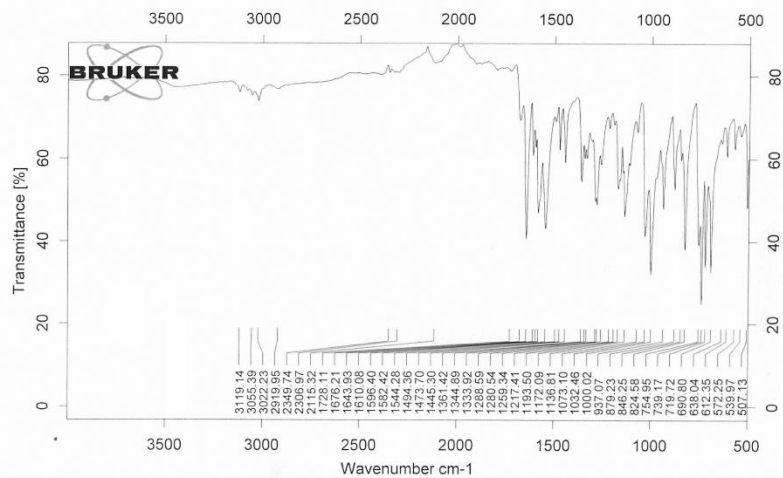

SAMPLE CODE : GIA-I-6Y

SAMPLE SCANS : 16

DATE : 7/28/2022

USER: Administrator

SAMPLE NAME: POWDER

TIME: 11:37:41 AM
